# Supplementary material
Source: publisher figshare collection journal article supplement (https://gsapubs.figshare.com/ndownloader/files/23312840)
Supplement: Supplementary file 1 [file 23312840]

## Sheet: Summary Sheet
Summary Table					1 decimal	1 decimal	1 decimal	1 decimal	3 decimals	3 decimals														KEY
Issues/ Notes	Project	Sample Name	No. of replicates	No. of acquisitions	δ13C PDB avg	1 s.d.	δ18O PDB avg	1 s.d.	Δ47 avg	1 s.e.	Winkelstern 2016 Average Temperature [°C]	1 s.e.	Defliese 2015 Average Temperature [°C]	1 s.e.	Kluge 2015 Average Temperature [°C]	1 s.e.	Kelson 2017 Average Temperature [°C]	1 s.e.	Tang 2014 Average Temperature [°C]	1 s.e.	Kele 2015 Average Temperature [°C]	1 s.e.		text highlight	Standard Error (x) of Temperature			cell highlight	# of replicates
High External D49 WG (Raw) SE	Nangqian	'16NQ02'	4	36	-2.64	0.0355903	-10.155	0.103763	0.68	0.00491596	33.7388	1.91964	30.9449	1.98344	27.9562	1.68992	28.1398	1.59275	28.0175	1.73463	31.241	1.57526		orange	10 > x > 5			orange	2
	Nangqian	'16NQ04'	2	18	-3.165	0.00707107	-11.5	0.0141421	0.6865	0.0025	31.1829	0.95224	28.3032	0.982839	25.7078	0.840439	26.0213	0.793143	25.7092	0.862167	29.1461	0.784782		green	5 > x > 2
High External D49 WG (Raw) SE	Nangqian	'16NQ05'	3	27	-0.03	0.0916515	-6.05667	0.323471	0.704333	0.00296273	24.6164	1.05348	21.5352	1.08427	19.8928	0.93615	20.5242	0.886545	19.7484	0.958849	23.7037	0.878245		black	2 > x > 0
	Nangqian	'16NQ08'	3	27	0.623333	0.051316	-1.81667	0.176163	0.690667	0.00635959	29.6599	2.38173	26.7341	2.45659	24.358	2.10558	24.7449	1.98877	24.3259	2.1592	27.8822	1.96838
	Nangqian	'16NQ11'	4	36	-10.8625	0.0275379	-7.6575	0.120934	0.55225	0.00366003	100.415	2.57398	100.886	2.74358	84.6228	2.10796	80.6336	1.91773	86.6463	2.19919	82.8577	1.87426
High T SE	Nangqian	'16NQ14'	2	18	-4.17	0.0707107	-10.96	0.0989949	0.5	0.021	145.164	20.6715	149.305	22.5925	120.1	16.0309	112.435	14.2251	123.92	16.9238	113.789	13.7899
High External D49 WG (Raw) SE	Nangqian	'16NQ19'	3	27	0.706667	0.023094	-9.67333	0.085049	0.603333	0.00328295	68.8796	1.78468	67.5317	1.87354	58.3384	1.5132	56.5184	1.39978	59.3315	1.56653	59.2226	1.37567
	Nangqian	'16NQ20'	5	45	0.74	0.0644205	-10.406	0.15225	0.5606	0.00692532	94.9491	4.70301	95.0869	5.00234	80.1007	3.87001	76.4997	3.52884	81.9391	4.03321	78.811	3.45149
	Nangqian	'16NQ21'	4	36	1.9475	0.015	-8.9675	0.146828	0.57675	0.00434693	84.2872	2.69478	83.7655	2.8501	71.2933	2.24606	68.4539	2.06057	72.7682	2.33414	70.9367	2.01948
	Nangqian	'16NQ22'	3	27	-2.59	0.0556776	-9.38	0.0655744	0.624	0.00378594	58.2307	1.8678	56.3836	1.95093	49.2505	1.60244	48.0848	1.49094	49.9372	1.65451	50.9254	1.46812
	Nangqian	'16NQ23'	3	27	-1.77	0.157162	-9.26	0.196977	0.631	0.0043589	54.8499	2.07186	52.8561	2.16008	46.3429	1.78524	45.3762	1.6646	46.9368	1.84145	48.2572	1.64031
High External D49 WG (Raw) SE	Nangqian	'16NQ25'	4	36	-5.765	0.0911043	-11.22	0.0948683	0.65975	0.0071458	42.0394	3.02096	39.5401	3.13234	35.2256	2.6372	34.9732	2.47505	35.488	2.71218	37.9934	2.44434
High External D49 WG (Raw) SE	Nangqian	'16NQ26'	3	27	-6.72	0.0888819	-8.32333	0.0378594	0.659	0.0051316	42.272	2.19357	39.7773	2.27554	35.4365	1.91271	35.1749	1.79406	35.7031	1.9676	38.1939	1.77144
	Nangqian	'16NQ34'	3	27	-0.716667	0.011547	-11.7167	0.0945163	0.678	0.00378594	34.4902	1.49377	31.72	1.5441	28.6204	1.31363	28.767	1.23743	28.6986	1.34871	31.8618	1.22362
	Nangqian	'16NQ35'	4	36	-2.72	0.0270801	-3.7625	0.07932	0.68075	0.00610157	33.4732	2.32326	30.6716	2.39794	27.7202	2.05046	27.9161	1.93506	27.7757	2.10347	31.0195	1.91466
High External D49 WG (Raw) SE	Nangqian	'16NQ36'	3	27	-0.52	0.0264575	-9.13	0.138924	0.659333	0.00523874	42.1327	2.23911	39.6329	2.32277	35.3147	1.95244	35.0605	1.83134	35.5779	2.00847	38.0809	1.80826
	Nangqian	'16NQ37'	2	18	-2.18	0.0282843	-10.065	0.0353553	0.6835	0.0065	32.3583	2.50433	29.5179	2.58607	26.7422	2.20771	26.9962	2.08222	26.7711	2.26539	30.1102	2.05986
Defliese, W.F., Hren, M.T., Lohmann, K.C., 2015. Compositional and temperature effects of phosphoric acid fractionation on Δ47 analysis and implications for discrepant calibrations. Chemical Geology 396, 51-60.
Kele, S., Breitenbach, S.F.M., Capezzuoli, E., Meckler, A.N., Ziegler, M., Millan, I.M., Kluge, T., Deák, J., Hanselmann, K., John, C.M., Yan, H., Liu, Z., Bernasconi, S.M., 2015. Temperature dependence of oxygen- and clumped isotope fractionation in carbonates: A study of travertines and tufas in the 6–95 °C temperature range. Geochimica et Cosmochimica Acta 168, 172-192.
Kelson, J.R., Huntington, K.W., Schauer, A.J., Saenger, C., Lechler, A.R., 2017. Toward a universal carbonate clumped isotope calibration: Diverse synthesis and preparatory methods suggest a single temperature relationship. Geochimica et Cosmochimica Acta 197, 104-131.
Kluge, T., John, C.M., Jourdan, A.-L., Davis, S., Crawshaw, J., 2015. Laboratory calibration of the calcium carbonate clumped isotope thermometer in the 25–250&#xa0;°C temperature range. Geochimica et Cosmochimica Acta 157, 213-227.
Tang, J.W., Dietzel, M., Fernandez, A., Tripati, A.K., Rosenheim, B.E., 2014. Evaluation of kinetic eﬀects on clumped isotope fractionation (Δ47) during inorganic calcite precipitation. Geochimica et Cosmochimica Acta 134, 120-136.
Winkelstern, I.Z., Kaczmarek, S.E., Lohmann, K.C., Humphrey, J.D., 2016. Calibration of dolomite clumped isotope thermometry. Chemical Geology 443, 32-38.

## Sheet: Data Calculations
Notes/		Run Date	Mass Spectrometer	Sample Name	Correction Interval	d13C VPDB (Raw)	d13C VPDB (Raw) SE	d18O VPDB (Raw)	d18O VPDB (Raw) SE	d18O VSMOW (Raw)	d18O VSMOW (Raw) SE	d47 WG (Raw)	d47 WG (Raw) SE	D47 WG (Raw)	D47 WG (Raw) SE	d48 WG (Raw)	d48 WG (Raw) SE	D48 WG (Raw)	D48 WG (Raw) SE	d49 WG (Raw)	d49 WG (Raw) SE	D49 WG (Raw)	D49 WG (Raw) SE	d13C VPDB (Final)	d13C VPDB (Final) SD	d18O VPDB (Final)	d18O VPDB (Final) SD	D47 CDES (Final)	D47 CDES (Final) SE	D47 Nonlinearity Slope	Non-linearity correction	D47 WG (HG)	ETF Slope	ETF Intercept	D47 CDES (ETF)	ARF (for 0.082, same as D47 CDES Final)		# of replicates	Standard Error Equations	Standard Deviation	Averages
Issues																										carbonate										acid dig corr [0.082]
	Project	Nangqian																																				1 replicate	#REF!	#REF!	#REF!
High External D49 WG (Raw) SE	'16NQ02'						0.0246644		0.0518813		0.0518813		1.63232		0.00744983		3.07147		0.230597		40.7356		36.8296	-2.64	0.0355903	-10.155	0.103763	0.68	0.00491596									8 replicates	#DIV/0!	#DIV/0!	#DIV/0!
	'R1'	'2016-11-09 16:48 PST'	'Chewbacca'	'16NQ02'	'2016-10-29 00:00:00 PDT'	-2.68	0	-2.74	0	28.04	0	3.573	0.008	-0.288	0.009	5.966	0.06	0.147	0.059	-0.978	0.378	-7.685	0.375	-2.67		-10.28		0.672		0.00372505	-0.30131	-0.301	1.33493	0.99107	0.59	0.672		9 replicates	#DIV/0!	#DIV/0!	#DIV/0!
																																						10 replicates	#DIV/0!	#DIV/0!	#DIV/0!
	'R3'	'2016-11-10 20:54 PST'	'Chewbacca'	'16NQ02'	'2016-10-29 00:00:00 PDT'	-2.63	0	-2.52	0	28.26	0	3.86	0.018	-0.273	0.018	6.145	0.057	-0.114	0.057	0.926	0.412	-6.28	0.408	-2.62		-10.06		0.689		0.00372505	-0.287379	-0.287	1.33493	0.99107	0.607	0.689		11 replicates	#DIV/0!	#DIV/0!	#DIV/0!
	'R4'	'2017-06-12 22:29 PDT'	'Chewbacca'	'16NQ02'	'2017-05-14 09:00:00 PDT'	-2.56	0	-2.54	0	28.24	0	9.469	0.011	-0.252	0.01	16.825	0.055	-0.748	0.055	140.016	0.881	119.374	0.869	-2.6		-10.08		0.688		0.00481564	-0.297599	-0.297	1.14934	0.947509	0.606	0.688		12 replicates	#DIV/0!	#DIV/0!	#DIV/0!
	'R5'	'2017-06-13 22:58 PDT'	'Chewbacca'	'16NQ02'	'2017-05-14 09:00:00 PDT'	-2.63	0	-2.66	0	28.12	0	9.262	0.015	-0.267	0.015	16.561	0.06	-0.773	0.058	142.128	0.51	121.793	0.502	-2.67		-10.2		0.671		0.00481564	-0.311602	-0.312	1.14934	0.947509	0.589	0.671
																																						1 replicate	#DIV/0!	#DIV/0!	#DIV/0!
	'16NQ04'						0.005		0.01		0.005		0.013		0.002		0.1115		0.129		0.924		0.897	-3.165	0.00707107	-11.5	0.0141421	0.6865	0.0025									2 replicates	#DIV/0!	#DIV/0!	#DIV/0!
	'R1'	'2016-11-07 00:11 PST'	'Chewbacca'	'16NQ04'	'2016-10-29 00:00:00 PDT'	-3.17	0	-3.95	0	26.79	0	1.855	0.014	-0.281	0.012	3.51	0.061	0.142	0.057	-1.707	0.54	-5.494	0.541	-3.17		-11.51		0.689		0.00372505	-0.28791	-0.288	1.33493	0.99107	0.607	0.689		3 replicates	#DIV/0!	#DIV/0!	#DIV/0!
																																						4 replicates	#DIV/0!	#DIV/0!	#DIV/0!
	'R3'	'2016-11-09 19:01 PST'	'Chewbacca'	'16NQ04'	'2016-10-29 00:00:00 PDT'	-3.16	0	-3.93	0	26.8	0	1.881	0.01	-0.285	0.011	3.287	0.057	-0.116	0.057	0.141	0.608	-3.7	0.605	-3.16		-11.49		0.684		0.00372505	-0.292007	-0.292	1.33493	0.99107	0.602	0.684		5 replicates	#DIV/0!	#DIV/0!	#DIV/0!
																																						6 replicates	#DIV/0!	#DIV/0!	#DIV/0!
High External D49 WG (Raw) SE	'16NQ05'						0.04		0.176918		0.180216		1.74138		0.0079652		3.22484		0.398027		48.3217		43.6356	-0.03	0.0916515	-6.05667	0.323471	0.704333	0.00296273									7 replicates	#DIV/0!	#DIV/0!	#DIV/0!
	'R1'	'2016-11-08 22:01 PST'	'Chewbacca'	'16NQ05'	'2016-10-29 00:00:00 PDT'	0.02	0	1.7	0	32.61	0	10.812	0.008	-0.232	0.007	15.618	0.068	0.819	0.067	-3.978	0.574	-22.056	0.564	0.05		-5.8		0.71		0.00372505	-0.272275	-0.272	1.33493	0.99107	0.628	0.71		8 replicates	#DIV/0!	#DIV/0!	#DIV/0!
																																						9 replicates	#DIV/0!	#DIV/0!	#DIV/0!
																																						10 replicates	#DIV/0!	#DIV/0!	#DIV/0!
	'R4'	'2017-06-13 00:38 PDT'	'Chewbacca'	'16NQ05'	'2017-05-14 09:00:00 PDT'	0.02	0	1.61	0	32.52	0	16.316	0.013	-0.206	0.013	25.87	0.068	-0.193	0.066	138.087	0.815	105.393	0.792	-0.01		-5.95		0.703		0.00481564	-0.284572	-0.284	1.14934	0.947509	0.621	0.703		11 replicates	#DIV/0!	#DIV/0!	#DIV/0!
	'R5'	'2017-06-13 18:45 PDT'	'Chewbacca'	'16NQ05'	'2017-05-14 09:00:00 PDT'	-0.1	0	1.13	0	32.03	0	15.702	0.016	-0.211	0.015	24.587	0.07	-0.498	0.069	143.723	0.78	112.054	0.759	-0.13		-6.42		0.7		0.00481564	-0.286615	-0.286	1.14934	0.947509	0.618	0.7		12 replicates	#DIV/0!	#DIV/0!	#DIV/0!
	'16NQ08'						0.0272845		0.100885		0.104083		0.0977758		0.00493288		0.307523		0.118926		0.173131		0.317956	0.623333	0.051316	-1.81667	0.176163	0.690667	0.00635959									1 replicate	#DIV/0!	#DIV/0!	#DIV/0!
	'R1'	'2016-11-09 02:32 PST'	'Chewbacca'	'16NQ08'	'2016-10-29 00:00:00 PDT'	0.65	0	5.49	0	36.52	0	15.315	0.016	-0.237	0.015	23.732	0.051	1.226	0.051	-3.75	0.581	-29.803	0.566	0.68		-1.96		0.68		0.00372505	-0.294049	-0.294	1.33493	0.99107	0.598	0.68		2 replicates	#DIV/0!	#DIV/0!	#DIV/0!
	'R2'	'2016-11-10 01:41 PST'	'Chewbacca'	'16NQ08'	'2016-10-29 00:00:00 PDT'	0.56	0	5.59	0	36.62	0	15.331	0.014	-0.23	0.013	23.745	0.043	1.045	0.043	-3.35	0.862	-29.51	0.84	0.58		-1.87		0.69		0.00372505	-0.287109	-0.287	1.33493	0.99107	0.608	0.69		3 replicates	#DIV/0!	#DIV/0!	#DIV/0!
	'R3'	'2016-11-13 19:28 PST'	'Chewbacca'	'16NQ08'	'2016-10-29 00:00:00 PDT'	0.58	0	5.83	0	36.87	0	15.616	0.008	-0.22	0.008	24.661	0.064	1.456	0.063	-3.937	0.592	-30.576	0.577	0.61		-1.62		0.702		0.00372505	-0.27817	-0.278	1.33493	0.99107	0.62	0.702		4 replicates	#DIV/0!	#DIV/0!	#DIV/0!
																																						5 replicates	#DIV/0!	#DIV/0!	#DIV/0!
	'16NQ11'						0.0119024		0.0596343		0.0627827		0.0621937		0.00267706		0.116049		0.00675154		0.407427		0.362816	-10.8625	0.0275379	-7.6575	0.120934	0.55225	0.00366003									6 replicates	#DIV/0!	#DIV/0!	#DIV/0!
																																						7 replicates	#DIV/0!	#DIV/0!	#DIV/0!
	'R2'	'2016-11-17 04:01 PST'	'Chewbacca'	'16NQ11'	'2016-10-29 00:00:00 PDT'	-10.8	0	-0.13	0	30.72	0	-1.784	0.015	-0.401	0.015	11.629	0.072	0.584	0.073	0.451	0.723	-3.324	0.72	-10.83		-7.65		0.546		0.00372505	-0.394355	-0.395	1.33493	0.99107	0.464	0.546		8 replicates	#DIV/0!	#DIV/0!	#DIV/0!
	'R3'	'2016-11-17 18:03 PST'	'Chewbacca'	'16NQ11'	'2016-10-29 00:00:00 PDT'	-10.84	0	0.02	0	30.89	0	-1.656	0.014	-0.391	0.014	11.941	0.059	0.578	0.059	-0.376	0.557	-4.418	0.552	-10.88		-7.49		0.56		0.00372505	-0.384831	-0.384	1.33493	0.99107	0.478	0.56		9 replicates	#DIV/0!	#DIV/0!	#DIV/0!
	'R4'	'2016-11-17 20:15 PST'	'Chewbacca'	'16NQ11'	'2016-10-29 00:00:00 PDT'	-10.85	0	-0.21	0	30.64	0	-1.914	0.011	-0.394	0.012	11.487	0.069	0.604	0.069	-1.528	0.679	-5.078	0.678	-10.89		-7.73		0.557		0.00372505	-0.38687	-0.387	1.33493	0.99107	0.475	0.557		10 replicates	#DIV/0!	#DIV/0!	#DIV/0!
	'R5'	'2016-11-18 02:57 PST'	'Chewbacca'	'16NQ11'	'2016-10-29 00:00:00 PDT'	-10.81	0	-0.25	0	30.61	0	-1.917	0.014	-0.402	0.013	11.418	0.061	0.604	0.06	-0.631	0.475	-4.158	0.476	-10.85		-7.76		0.546		0.00372505	-0.394859	-0.395	1.33493	0.99107	0.464	0.546		11 replicates	#DIV/0!	#DIV/0!	#DIV/0!
																																						12 replicates	#DIV/0!	#DIV/0!	#DIV/0!
High T SE	'16NQ14'						0.045		0.075		0.075		0.105		0.0155		0.296		0.1495		0.9025		1.0915	-4.17	0.0707107	-10.96	0.0989949	0.5	0.021
	'R1'	'2016-11-09 04:43 PST'	'Chewbacca'	'16NQ14'	'2016-10-29 00:00:00 PDT'	-4.13	0	-3.34	0	27.42	0	1.397	0.013	-0.44	0.013	4.678	0.072	0.082	0.073	-1.357	0.702	-5.417	0.7	-4.12		-10.89		0.479		0.00372505	-0.445204	-0.445	1.33493	0.99107	0.397	0.479		1 replicate	#DIV/0!	#DIV/0!	#DIV/0!
	'R2'	'2016-11-11 07:05 PST'	'Chewbacca'	'16NQ14'	'2016-10-29 00:00:00 PDT'	-4.22	0	-3.49	0	27.27	0	1.187	0.013	-0.409	0.012	4.086	0.075	-0.217	0.077	0.448	0.585	-3.234	0.585	-4.22		-11.03		0.521		0.00372505	-0.413422	-0.414	1.33493	0.99107	0.439	0.521		2 replicates	#DIV/0!	#DIV/0!	#DIV/0!
																																						3 replicates	#DIV/0!	#DIV/0!	#DIV/0!
																																						4 replicates	#DIV/0!	#DIV/0!	#DIV/0!
High External D49 WG (Raw) SE	'16NQ19'						0.0152753		0.0493288		0.0493288		1.83059		0.00768838		3.36165		0.350423		47.6084		43.0244	0.706667	0.023094	-9.67333	0.085049	0.603333	0.00328295									5 replicates	#DIV/0!	#DIV/0!	#DIV/0!
																																						6 replicates	#DIV/0!	#DIV/0!	#DIV/0!
																																						7 replicates	#DIV/0!	#DIV/0!	#DIV/0!
	'R3'	'2016-11-14 17:15 PST'	'Chewbacca'	'16NQ19'	'2016-10-29 00:00:00 PDT'	0.7	0	-2.05	0	28.74	0	7.515	0.009	-0.329	0.01	7.567	0.052	0.357	0.053	-2.451	0.369	-13.84	0.365	0.72		-9.59		0.597		0.00372505	-0.356994	-0.357	1.33493	0.99107	0.515	0.597		8 replicates	#DIV/0!	#DIV/0!	#DIV/0!
	'R4'	'2017-06-14 01:08 PDT'	'Chewbacca'	'16NQ19'	'2017-05-14 09:00:00 PDT'	0.71	0	-2.22	0	28.57	0	12.937	0.012	-0.305	0.011	17.485	0.069	-0.752	0.067	141.198	0.683	116.165	0.668	0.68		-9.76		0.608		0.00481564	-0.3673	-0.367	1.14934	0.947509	0.526	0.608		9 replicates	#DIV/0!	#DIV/0!	#DIV/0!
	'R5'	'2017-06-14 15:53 PDT'	'Chewbacca'	'16NQ19'	'2017-05-14 09:00:00 PDT'	0.75	0	-2.12	0	28.67	0	13.074	0.018	-0.307	0.017	17.811	0.077	-0.625	0.076	139.536	0.622	114.281	0.61	0.72		-9.67		0.605		0.00481564	-0.36996	-0.37	1.14934	0.947509	0.523	0.605		10 replicates	#DIV/0!	#DIV/0!	#DIV/0!
																																						11 replicates	#DIV/0!	#DIV/0!	#DIV/0!
	'16NQ20'						0.0248193		0.056		0.0595483		1.36494		0.00788416		2.55585		0.225732		32.832		29.5447	0.74	0.0644205	-10.406	0.15225	0.5606	0.00692532									12 replicates	#DIV/0!	#DIV/0!	#DIV/0!
	'R1'	'2016-11-12 17:42 PST'	'Chewbacca'	'16NQ20'	'2016-10-29 00:00:00 PDT'	0.81	0	-2.72	0	28.06	0	6.926	0.018	-0.348	0.017	6.068	0.061	0.191	0.061	-1.824	0.435	-12.023	0.431	0.84		-10.26		0.574		0.00372505	-0.3738	-0.374	1.33493	0.99107	0.492	0.574
	'R2'	'2016-11-13 05:00 PST'	'Chewbacca'	'16NQ20'	'2016-10-29 00:00:00 PDT'	0.67	0	-3.04	0	27.72	0	6.43	0.016	-0.37	0.016	5.454	0.053	0.239	0.051	-1.095	0.701	-10.512	0.697	0.7		-10.59		0.547		0.00372505	-0.393952	-0.394	1.33493	0.99107	0.465	0.547		1 replicate	#DIV/0!	#DIV/0!	#DIV/0!
																																						2 replicates	#DIV/0!	#DIV/0!	#DIV/0!
	'R4'	'2017-03-25 01:30 PDT'	'Chewbacca'	'16NQ20'	'2017-02-23 01:53:00 PST'	0.71	0	-2.81	0	27.97	0	12.263	0.019	-0.378	0.017	16.469	0.083	-0.578	0.078	111.884	2.151	88.768	2.111	0.67		-10.24		0.542		0.00482912	-0.437219	-0.437	1.15636	0.964608	0.46	0.542		3 replicates	#DIV/0!	#DIV/0!	#DIV/0!
	'R5'	'2017-06-14 03:19 PDT'	'Chewbacca'	'16NQ20'	'2017-05-14 09:00:00 PDT'	0.77	0	-2.9	0	27.87	0	12.252	0.012	-0.346	0.012	16.113	0.082	-0.743	0.083	141.666	0.448	118.077	0.44	0.74		-10.44		0.564		0.00481564	-0.405001	-0.405	1.14934	0.947509	0.482	0.564		4 replicates	#DIV/0!	#DIV/0!	#DIV/0!
	'R6'	'2017-06-14 22:18 PDT'	'Chewbacca'	'16NQ20'	'2017-05-14 09:00:00 PDT'	0.77	0	-2.96	0	27.81	0	12.208	0.013	-0.336	0.012	15.965	0.044	-0.768	0.042	139.069	0.791	115.66	0.777	0.75		-10.5		0.576		0.00481564	-0.394789	-0.394	1.14934	0.947509	0.494	0.576		5 replicates	#DIV/0!	#DIV/0!	#DIV/0!
																																						6 replicates	#DIV/0!	#DIV/0!	#DIV/0!
	'16NQ21'						0.0125		0.0655744		0.0666458		1.42446		0.00388104		2.6777		0.205737		30.0343		26.5537	1.9475	0.015	-8.9675	0.146828	0.57675	0.00434693									7 replicates	#DIV/0!	#DIV/0!	#DIV/0!
	'R1'	'2016-11-12 19:53 PST'	'Chewbacca'	'16NQ21'	'2016-10-29 00:00:00 PDT'	1.93	0	-1.35	0	29.46	0	9.431	0.017	-0.33	0.016	9.053	0.048	0.425	0.045	-3.467	0.533	-17.433	0.528	1.96		-8.88		0.586		0.00372505	-0.365131	-0.365	1.33493	0.99107	0.504	0.586		8 replicates	#DIV/0!	#DIV/0!	#DIV/0!
	'R2'	'2016-11-14 22:07 PST'	'Chewbacca'	'16NQ21'	'2016-10-29 00:00:00 PDT'	1.9	0	-1.43	0	29.39	0	9.325	0.01	-0.339	0.009	8.914	0.059	0.43	0.057	-2.242	0.553	-16.062	0.544	1.94		-8.95		0.574		0.00372505	-0.373736	-0.374	1.33493	0.99107	0.492	0.574		9 replicates	#DIV/0!	#DIV/0!	#DIV/0!
	'R3'	'2016-11-16 18:57 PST'	'Chewbacca'	'16NQ21'	'2016-10-29 00:00:00 PDT'	1.92	0	-1.65	0	29.16	0	9.112	0.01	-0.346	0.011	8.434	0.065	0.394	0.066	-2.6	0.496	-16.001	0.491	1.96		-9.18		0.566		0.00372505	-0.379943	-0.38	1.33493	0.99107	0.484	0.566		10 replicates	#DIV/0!	#DIV/0!	#DIV/0!
	'R4'	'2017-03-25 20:38 PDT'	'Chewbacca'	'16NQ21'	'2017-02-23 01:53:00 PST'	1.96	0	-1.41	0	29.41	0	14.981	0.01	-0.33	0.01	19.498	0.065	-0.406	0.064	117.363	0.704	89.708	0.686	1.93		-8.86		0.581		0.00482912	-0.402345	-0.402	1.15636	0.964608	0.499	0.581		11 replicates	#DIV/0!	#DIV/0!	#DIV/0!
																																						12 replicates	#DIV/0!	#DIV/0!	#DIV/0!
	'16NQ22'						0.0321455		0.0409607		0.0409607		0.0696427		0.00328295		0.0342264		0.0458851		2.17209		2.03117	-2.59	0.0556776	-9.38	0.0655744	0.624	0.00378594
																																						1 replicate	#DIV/0!	#DIV/0!	#DIV/0!
	'R2'	'2017-03-21 17:09 PDT'	'Chewbacca'	'16NQ22'	'2017-02-23 01:53:00 PST'	-2.48	0	-1.87	0	28.93	0	10.169	0.016	-0.315	0.015	18.322	0.078	-0.619	0.077	120.38	0.733	98.535	0.719	-2.53		-9.32		0.625		0.00482912	-0.364107	-0.364	1.15636	0.964608	0.543	0.625		2 replicates	#DIV/0!	#DIV/0!	#DIV/0!
	'R3'	'2017-03-22 04:08 PDT'	'Chewbacca'	'16NQ22'	'2017-02-23 01:53:00 PST'	-2.59	0	-2.01	0	28.79	0	9.928	0.008	-0.312	0.008	18.204	0.06	-0.462	0.058	114.306	2.29	92.994	2.248	-2.64		-9.45		0.63		0.00482912	-0.359943	-0.36	1.15636	0.964608	0.548	0.63		3 replicates	#DIV/0!	#DIV/0!	#DIV/0!
	'R4'	'2017-03-23 01:06 PDT'	'Chewbacca'	'16NQ22'	'2017-02-23 01:53:00 PST'	-2.55	0	-1.92	0	28.88	0	10.039	0.014	-0.323	0.013	18.273	0.039	-0.562	0.039	121.189	0.891	99.52	0.876	-2.6		-9.37		0.617		0.00482912	-0.37148	-0.372	1.15636	0.964608	0.535	0.617		4 replicates	#DIV/0!	#DIV/0!	#DIV/0!
																																						5 replicates	#DIV/0!	#DIV/0!	#DIV/0!
	'16NQ23'						0.112151		0.0881917		0.0907377		2.03867		0.00366667		3.69334		0.267142		39.9915		35.2799	-1.77	0.157162	-9.26	0.196977	0.631	0.0043589									6 replicates	#DIV/0!	#DIV/0!	#DIV/0!
																																						7 replicates	#DIV/0!	#DIV/0!	#DIV/0!
	'R2'	'2016-11-15 02:41 PST'	'Chewbacca'	'16NQ23'	'2016-10-29 00:00:00 PDT'	-1.93	0	-1.79	0	29.02	0	5.258	0.013	-0.306	0.013	8.026	0.05	0.291	0.05	-2.176	0.585	-11.502	0.581	-1.91		-9.32		0.639		0.00372505	-0.325586	-0.325	1.33493	0.99107	0.557	0.639		8 replicates	#DIV/0!	#DIV/0!	#DIV/0!
	'R3'	'2016-11-16 21:09 PST'	'Chewbacca'	'16NQ23'	'2016-10-29 00:00:00 PDT'	-1.81	0	-1.89	0	28.91	0	5.254	0.012	-0.317	0.011	7.901	0.06	0.37	0.06	-2.836	0.659	-12.067	0.654	-1.8		-9.42		0.624		0.00372505	-0.336571	-0.336	1.33493	0.99107	0.542	0.624		9 replicates	#DIV/0!	#DIV/0!	#DIV/0!
	'R4'	'2017-03-25 22:43 PDT'	'Chewbacca'	'16NQ23'	'2017-02-23 01:53:00 PST'	-1.55	0	-1.59	0	29.22	0	11.372	0.012	-0.306	0.012	19.043	0.057	-0.468	0.055	117.467	0.457	94.054	0.446	-1.6		-9.04		0.63		0.00482912	-0.360917	-0.361	1.15636	0.964608	0.548	0.63		10 replicates	#DIV/0!	#DIV/0!	#DIV/0!
																																						11 replicates	#DIV/0!	#DIV/0!	#DIV/0!
High External D49 WG (Raw) SE	'16NQ25'						0.0462556		0.0227303		0.0209662		0.0652359		0.00474342		0.100175		0.0817928		5.85177		5.86545	-5.765	0.0911043	-11.22	0.0948683	0.65975	0.0071458									12 replicates	#DIV/0!	#DIV/0!	#DIV/0!
	'R2'	'2017-03-21 19:20 PDT'	'Chewbacca'	'16NQ25'	'2017-02-23 01:53:00 PST'	-5.66	0	-3.76	0.01	26.99	0.01	5.136	0.011	-0.298	0.009	14.327	0.045	-0.758	0.041	126.958	2.146	112.721	2.097	-5.73		-11.18		0.674		0.00482912	-0.322802	-0.322	1.15636	0.964608	0.592	0.674		1 replicate	#DIV/0!	#DIV/0!	#DIV/0!
	'R3'	'2017-03-22 16:24 PDT'	'Chewbacca'	'16NQ25'	'2017-02-23 01:53:00 PST'	-5.67	0	-3.72	0.01	27.02	0.01	5.165	0.018	-0.301	0.015	14.601	0.095	-0.557	0.072	112.55	0.79	98.423	0.761	-5.73		-11.15		0.67		0.00482912	-0.325942	-0.326	1.15636	0.964608	0.588	0.67		2 replicates	#DIV/0!	#DIV/0!	#DIV/0!
	'R4'	'2017-03-24 16:44 PDT'	'Chewbacca'	'16NQ25'	'2017-02-23 01:53:00 PST'	-5.64	0	-3.77	0.02	26.98	0.02	5.128	0.015	-0.319	0.015	14.696	0.115	-0.373	0.087	117.122	0.86	103.005	0.864	-5.7		-11.19		0.649		0.00482912	-0.343764	-0.344	1.15636	0.964608	0.567	0.649		3 replicates	#DIV/0!	#DIV/0!	#DIV/0!
	'R5'	'2017-06-13 02:51 PDT'	'Chewbacca'	'16NQ25'	'2017-05-14 09:00:00 PDT'	-5.84	0	-3.83	0	26.92	0	4.884	0.012	-0.31	0.013	14.291	0.055	-0.653	0.056	138.96	0.786	124.923	0.779	-5.9		-11.36		0.646		0.00481564	-0.33352	-0.334	1.14934	0.947509	0.564	0.646		4 replicates	#DIV/0!	#DIV/0!	#DIV/0!
																																						5 replicates	#DIV/0!	#DIV/0!	#DIV/0!
High External D49 WG (Raw) SE	'16NQ26'						0.0404145		0.0176383		0.0185592		1.82981		0.0072188		3.43188		0.356649		47.4402		43.0155	-6.72	0.0888819	-8.32333	0.0378594	0.659	0.0051316									6 replicates	#DIV/0!	#DIV/0!	#DIV/0!
	'R1'	'2016-11-17 01:34 PST'	'Chewbacca'	'16NQ26'	'2016-10-29 00:00:00 PDT'	-6.61	0	-0.82	0	30.02	0	1.698	0.014	-0.298	0.015	10.216	0.06	0.537	0.058	-1.596	0.507	-8.195	0.503	-6.62		-8.34		0.666		0.00372505	-0.304325	-0.305	1.33493	0.99107	0.584	0.666		7 replicates	#DIV/0!	#DIV/0!	#DIV/0!
	'R2'	'2016-11-17 22:26 PST'	'Chewbacca'	'16NQ26'	'2016-10-29 00:00:00 PDT'	-6.74	0	-0.76	0	30.08	0	1.62	0.013	-0.311	0.013	10.277	0.056	0.485	0.055	-2.072	0.52	-8.653	0.518	-6.75		-8.28		0.649		0.00372505	-0.317035	-0.318	1.33493	0.99107	0.567	0.649		8 replicates	#DIV/0!	#DIV/0!	#DIV/0!
																																						9 replicates	#DIV/0!	#DIV/0!	#DIV/0!
																																						10 replicates	#DIV/0!	#DIV/0!	#DIV/0!
	'R5'	'2017-06-15 02:33 PDT'	'Chewbacca'	'16NQ26'	'2017-05-14 09:00:00 PDT'	-6.72	0	-0.8	0	30.03	0	7.148	0.01	-0.286	0.01	20.542	0.074	-0.558	0.074	140.486	0.748	120.622	0.736	-6.79		-8.35		0.662		0.00481564	-0.320422	-0.32	1.14934	0.947509	0.58	0.662		11 replicates	#DIV/0!	#DIV/0!	#DIV/0!
																																						12 replicates	#DIV/0!	#DIV/0!	#DIV/0!
	'16NQ34'						0.00666667		0.054569		0.054569		0.0587689		0.00296273		0.129832		0.0592209		4.64002		4.43683	-0.716667	0.011547	-11.7167	0.0945163	0.678	0.00378594
	'R1'	'2017-03-20 00:05 PDT'	'Chewbacca'	'16NQ34'	'2017-02-23 01:53:00 PST'	-0.68	0	-4.37	0.01	26.36	0.01	9.401	0.016	-0.269	0.017	13.227	0.111	-0.634	0.095	108.639	0.622	90.515	0.622	-0.73		-11.79		0.684		0.00482912	-0.314399	-0.314	1.15636	0.964608	0.602	0.684		1 replicate	#DIV/0!	#DIV/0!	#DIV/0!
																																						2 replicates	#DIV/0!	#DIV/0!	#DIV/0!
	'R3'	'2017-03-22 18:34 PDT'	'Chewbacca'	'16NQ34'	'2017-02-23 01:53:00 PST'	-0.66	0	-4.33	0.01	26.4	0.01	9.459	0.014	-0.272	0.011	13.52	0.065	-0.432	0.059	112.165	2.173	93.87	2.128	-0.71		-11.75		0.679		0.00482912	-0.317679	-0.318	1.15636	0.964608	0.597	0.679		3 replicates	#DIV/0!	#DIV/0!	#DIV/0!
	'R4'	'2017-03-24 18:56 PDT'	'Chewbacca'	'16NQ34'	'2017-02-23 01:53:00 PST'	-0.66	0	-4.19	0	26.54	0	9.599	0.017	-0.279	0.017	13.669	0.044	-0.564	0.045	123.983	2.184	105.182	2.141	-0.71		-11.61		0.671		0.00482912	-0.325355	-0.325	1.15636	0.964608	0.589	0.671		4 replicates	#DIV/0!	#DIV/0!	#DIV/0!
																																						5 replicates	#DIV/0!	#DIV/0!	#DIV/0!
	'16NQ35'						0.0135401		0.03966		0.0414327		0.0555403		0.00536967		0.333529		0.25993		1.62808		1.60466	-2.72	0.0270801	-3.7625	0.07932	0.68075	0.00610157									6 replicates	#DIV/0!	#DIV/0!	#DIV/0!
	'R1'	'2017-03-20 02:30 PDT'	'Chewbacca'	'16NQ35'	'2017-02-23 01:53:00 PST'	-2.69	0	3.67	0.01	34.64	0.01	15.737	0.015	-0.247	0.008	29.273	0.226	-0.973	0.206	124.402	1.463	90.578	1.434	-2.74		-3.84		0.674		0.00482912	-0.322996	-0.323	1.15636	0.964608	0.592	0.674		7 replicates	#DIV/0!	#DIV/0!	#DIV/0!
	'R2'	'2017-03-22 01:59 PDT'	'Chewbacca'	'16NQ35'	'2017-02-23 01:53:00 PST'	-2.68	0	3.69	0	34.66	0	15.774	0.007	-0.244	0.007	30.312	0.063	-0.005	0.061	131.767	0.905	97.661	0.878	-2.73		-3.82		0.676		0.00482912	-0.320174	-0.321	1.15636	0.964608	0.594	0.676		8 replicates	#DIV/0!	#DIV/0!	#DIV/0!
	'R3'	'2017-03-22 22:59 PDT'	'Chewbacca'	'16NQ35'	'2017-02-23 01:53:00 PST'	-2.68	0	3.8	0	34.77	0	15.91	0.009	-0.224	0.009	30.597	0.05	0.051	0.048	125.612	0.934	91.448	0.906	-2.73		-3.71		0.699		0.00482912	-0.300831	-0.301	1.15636	0.964608	0.617	0.699		9 replicates	#DIV/0!	#DIV/0!	#DIV/0!
	'R4'	'2017-03-24 23:22 PDT'	'Chewbacca'	'16NQ35'	'2017-02-23 01:53:00 PST'	-2.63	0	3.83	0	34.81	0	15.972	0.011	-0.245	0.01	30.757	0.065	0.135	0.064	126.358	1.415	92.042	1.372	-2.68		-3.68		0.674		0.00482912	-0.322131	-0.322	1.15636	0.964608	0.592	0.674		10 replicates	#DIV/0!	#DIV/0!	#DIV/0!
																																						11 replicates	#DIV/0!	#DIV/0!	#DIV/0!
High External D49 WG (Raw) SE	'16NQ36'						0.00333333		0.0817177		0.0866667		1.9081		0.00986577		3.57868		0.302833		48.8709		44.1024	-0.52	0.0264575	-9.13	0.138924	0.659333	0.00523874									12 replicates	#DIV/0!	#DIV/0!	#DIV/0!
	'R1'	'2016-11-07 02:33 PST'	'Chewbacca'	'16NQ36'	'2016-10-29 00:00:00 PDT'	-0.53	0	-1.51	0	29.3	0	6.932	0.01	-0.279	0.01	8.598	0.047	0.299	0.047	-2.11	0.716	-13.369	0.711	-0.51		-9.04		0.666		0.00372505	-0.304822	-0.305	1.33493	0.99107	0.584	0.666
	'R2'	'2016-11-08 17:42 PST'	'Chewbacca'	'16NQ36'	'2016-10-29 00:00:00 PDT'	-0.53	0	-1.76	0	29.04	0	6.661	0.013	-0.293	0.013	7.999	0.058	0.207	0.059	-3.245	0.676	-13.995	0.671	-0.5		-9.29		0.649		0.00372505	-0.317813	-0.318	1.33493	0.99107	0.567	0.649		1 replicate	#DIV/0!	#DIV/0!	#DIV/0!
																																						2 replicates	#DIV/0!	#DIV/0!	#DIV/0!
	'R4'	'2017-06-13 16:36 PDT'	'Chewbacca'	'16NQ36'	'2017-05-14 09:00:00 PDT'	-0.52	0	-1.52	0	29.3	0	12.516	0.011	-0.259	0.011	19.022	0.048	-0.652	0.047	143.932	0.985	118.624	0.964	-0.55		-9.06		0.663		0.00481564	-0.319273	-0.319	1.14934	0.947509	0.581	0.663		3 replicates	#DIV/0!	#DIV/0!	#DIV/0!
																																						4 replicates	#DIV/0!	#DIV/0!	#DIV/0!
	'16NQ37'						0.02		0.02		0.025		0.0055		0.005		0.198		0.238		1.3095		1.2805	-2.18	0.0282843	-10.065	0.0353553	0.6835	0.0065									5 replicates	#DIV/0!	#DIV/0!	#DIV/0!
	'R1'	'2016-11-10 23:04 PST'	'Chewbacca'	'16NQ37'	'2016-10-29 00:00:00 PDT'	-2.21	0	-2.51	0	28.28	0	4.27	0.008	-0.281	0.007	6.151	0.056	-0.132	0.057	0.394	0.7	-7.245	0.694	-2.2		-10.04		0.677		0.00372505	-0.296906	-0.297	1.33493	0.99107	0.595	0.677		6 replicates	#DIV/0!	#DIV/0!	#DIV/0!
	'R2'	'2016-11-14 04:39 PST'	'Chewbacca'	'16NQ37'	'2016-10-29 00:00:00 PDT'	-2.17	0	-2.55	0	28.23	0	4.281	0.016	-0.271	0.014	6.547	0.028	0.344	0.026	-2.225	0.747	-9.806	0.745	-2.16		-10.09		0.69		0.00372505	-0.286947	-0.287	1.33493	0.99107	0.608	0.69		7 replicates	#DIV/0!	#DIV/0!	#DIV/0!
																																						8 replicates	#DIV/0!	#DIV/0!	#DIV/0!
																																						9 replicates	#DIV/0!	#DIV/0!	#DIV/0!
																																						10 replicates	#DIV/0!	#DIV/0!	#DIV/0!
																																						11 replicates	#DIV/0!	#DIV/0!	#DIV/0!
																																						12 replicates	#DIV/0!	#DIV/0!	#DIV/0!

## Sheet: Temperature Estimates
Notes/ Issues	Calibration Type:	Dolomite - syn		Calcite - syn		Calcite - syn		Calcite - syn		Calcite - syn		Calcite - natural			# of replicates
	Study author(s):	Winkelstern et al. 2016		Defliese et al. 2015		Kluge et al. 2015		Kelson et al. 2017		Tang et al. 2014		Kele et al. 2015						Kelson: x < 15
		slope	intercept	slope	intercept	slope	intercept	slope	intercept	slope	intercept	slope	intercept					Defliese: 15 < x < 30
		0.037	-0.287	0.03484	-0.3031	0.0397	-0.242	0.0422	-0.215	0.0387	-0.2532	0.044	-0.205					Kele: 30 < x < 50
		Temp [°C]	+/- SE	Temp [°C]	+/- SE	Temp [°C]	+/- SE	Temp [°C]	+/- SE	Temp [°C]	+/- SE	Temp [°C]	+/- SE					Kelson2: x > 50
	Project	Nangqian													1 replicate
	'16NQ02'	33.7388	1.91964	30.9449	1.98344	27.9562	1.68992	28.1398	1.59275	28.0175	1.73463	31.241	1.57526		8 replicates
	'R1'	36.8563		34.1657		30.7012		30.7272		30.835		33.8002			9 replicates
	'R2'														10 replicates
	'R3'	30.2306		27.3204		24.8673		25.2282		24.847		28.3613			11 replicates
	'R4'	30.6087		27.7105		25.2012		25.5434		25.1895		28.6733			12 replicates
	'R5'	37.2597		34.5831		31.0552		31.0602		31.1986		34.1294
															1 replicate
	'16NQ04'	31.1829	0.95224	28.3032	0.982839	25.7078	0.840439	26.0213	0.793143	25.7092	0.862167	29.1461	0.784782		2 replicates
	'R1'	30.2306		27.3204		24.8673		25.2282		24.847		28.3613			3 replicates
	'R2'														4 replicates
	'R3'	32.1351		29.2861		26.5482		26.8145		26.5713		29.9309			5 replicates
															6 replicates
	'16NQ05'	24.6164	1.05348	21.5352	1.08427	19.8928	0.93615	20.5242	0.886545	19.7484	0.958849	23.7037	0.878245		7 replicates
	'R1'	22.604		19.4641		18.1043		18.8304		17.9166		22.0257			8 replicates
	'R2'														9 replicates
	'R3'														10 replicates
	'R4'	25.082		22.014		20.3072		20.917		20.1728		24.093			11 replicates
	'R5'	26.1632		23.1274		21.2668		21.8251		21.1559		24.9924			12 replicates
	'16NQ08'	29.6599	2.38173	26.7341	2.45659	24.358	2.10558	24.7449	1.98877	24.3259	2.1592	27.8822	1.96838		1 replicate
	'R1'	33.6848		30.8867		27.9136		28.1019		27.9725		31.2044			2 replicates
	'R2'	29.854		26.9318		24.5345		24.9139		24.5057		28.0503			3 replicates
	'R3'	25.4411		22.3837		20.626		21.2188		20.4994		24.3919			4 replicates
															5 replicates
	'16NQ11'	100.415	2.57398	100.886	2.74358	84.6228	2.10796	80.6336	1.91773	86.6463	2.19919	82.8577	1.87426		6 replicates
	'R1'														7 replicates
	'R2'	104.814		105.576		88.2253		83.9108		90.4049		86.0606			8 replicates
	'R3'	94.9955		95.1121		80.181		76.5911		82.0131		78.9063			9 replicates
	'R4'	97.0351		97.2813		81.8595		78.1217		83.7624		80.4034			10 replicates
	'R5'	104.814		105.576		88.2253		83.9108		90.4049		86.0606			11 replicates
															12 replicates
High T SE	'16NQ14'	145.164	20.6715	149.305	22.5925	120.1	16.0309	112.435	14.2251	123.92	16.9238	113.789	13.7899
	'R1'	165.836		171.897		136.131		126.661		140.843		127.579			1 replicate
	'R2'	124.493		126.712		104.069		98.2103		106.996		99.9994			2 replicates
	'R3'														3 replicates
															4 replicates
	'16NQ19'	68.8796	1.78468	67.5317	1.87354	58.3384	1.5132	56.5184	1.39978	59.3315	1.56653	59.2226	1.37567		5 replicates
	'R1'														6 replicates
	'R2'														7 replicates
	'R3'	72.3277		71.1518		61.2614		59.2221		62.3577		61.8797			8 replicates
	'R4'	66.3567		64.884		56.1978		54.5376		57.1159		57.2757			9 replicates
	'R5'	67.9544		66.5594		57.5559		55.7955		58.521		58.5125			10 replicates
															11 replicates
	'16NQ20'	94.9491	4.70301	95.0869	5.00234	80.1007	3.87001	76.4997	3.52884	81.9391	4.03321	78.811	3.45149		12 replicates
	'R1'	85.9041		85.4701		72.651		69.7038		74.1768		72.1632
	'R2'	104.087		104.799		87.6324		83.3727		89.7856		85.5351			1 replicate
	'R3'														2 replicates
	'R4'	107.767		108.734		90.6265		86.0881		92.9139		88.1861			3 replicates
	'R5'	92.3278		92.2782		77.9795		74.5811		79.7202		76.9395			4 replicates
	'R6'	84.6596		84.1535		71.6141		68.7528		73.0992		71.2312			5 replicates
															6 replicates
	'16NQ21'	84.2872	2.69478	83.7655	2.8501	71.2933	2.24606	68.4539	2.06057	72.7682	2.33414	70.9367	2.01948		7 replicates
	'R1'	78.6252		77.7817		66.566		64.1134		67.8574		66.6817			8 replicates
	'R2'	85.9041		85.4701		72.651		69.7038		74.1768		72.1632			9 replicates
	'R3'	91.0155		90.8855		76.8941		73.589		78.5903		75.9684			10 replicates
	'R4'	81.6039		80.9246		69.0621		66.4093		70.4483		68.9337			11 replicates
															12 replicates
	'16NQ22'	58.2307	1.8678	56.3836	1.95093	49.2505	1.60244	48.0848	1.49094	49.9372	1.65451	50.9254	1.46812
	'R1'														1 replicate
	'R2'	57.7087		55.8369		48.8055		47.6721		49.4771		50.5194			2 replicates
	'R3'	55.2883		53.3112		46.7243		45.7336		47.3293		48.6099			3 replicates
	'R4'	61.6951		60.0028		52.2216		50.8486		53.0051		53.6468			4 replicates
															5 replicates
	'16NQ23'	54.8499	2.07186	52.8561	2.16008	46.3429	1.78524	45.3762	1.6646	46.9368	1.84145	48.2572	1.64031		6 replicates
	'R1'														7 replicates
	'R2'	51.0623		48.908		43.0778		42.3311		43.5692		45.2562			8 replicates
	'R3'	58.1992		56.3491		49.2266		48.0641		49.9118		50.9054			9 replicates
	'R4'	55.2883		53.3112		46.7243		45.7336		47.3293		48.6099			10 replicates
															11 replicates
	'16NQ25'	42.0394	3.02096	39.5401	3.13234	35.2256	2.6372	34.9732	2.47505	35.488	2.71218	37.9934	2.44434		12 replicates
	'R1'
	'R2'	36.0542		33.336		29.9971		30.0644		30.1117		33.145			1 replicate
	'R3'	37.6646		35.0022		31.4104		31.3943		31.5635		34.4596			2 replicates
	'R4'	46.5529		44.2185		39.1687		38.6753		39.5426		41.6501			3 replicates
	'R5'	47.8859		45.6038		40.3262		39.7587		40.7344		42.719			4 replicates
															5 replicates
	'16NQ26'	42.272	2.19357	39.7773	2.27554	35.4365	1.91271	35.1749	1.79406	35.7031	1.9676	38.1939	1.77144		6 replicates
	'R1'	39.3005		36.6958		32.8436		32.7419		33.0362		35.7912			7 replicates
	'R2'	46.5529		44.2185		39.1687		38.6753		39.5426		41.6501			8 replicates
	'R3'														9 replicates
	'R4'														10 replicates
	'R5'	40.9625		38.4176		34.2972		34.1075		34.5305		37.1403			11 replicates
															12 replicates
	'16NQ34'	34.4902	1.49377	31.72	1.5441	28.6204	1.31363	28.767	1.23743	28.6986	1.34871	31.8618	1.22362
	'R1'	32.1351		29.2861		26.5482		26.8145		26.5713		29.9309			1 replicate
	'R2'														2 replicates
	'R3'	34.0759		31.2908		28.2578		28.4263		28.3259		31.5252			3 replicates
	'R4'	37.2597		34.5831		31.0552		31.0602		31.1986		34.1294			4 replicates
															5 replicates
	'16NQ35'	33.4732	2.32326	30.6716	2.39794	27.7202	2.05046	27.9161	1.93506	27.7757	2.10347	31.0195	1.91466		6 replicates
	'R1'	36.0542		33.336		29.9971		30.0644		30.1117		33.145			7 replicates
	'R2'	35.2583		32.513		29.2978		29.406		29.3936		32.494			8 replicates
	'R3'	26.5262		23.5013		21.5887		22.1297		21.4858		25.294			9 replicates
	'R4'	36.0542		33.336		29.9971		30.0644		30.1117		33.145			10 replicates
															11 replicates
	'16NQ36'	42.1327	2.23911	39.6329	2.32277	35.3147	1.95244	35.0605	1.83134	35.5779	2.00847	38.0809	1.80826		12 replicates
	'R1'	39.3005		36.6958		32.8436		32.7419		33.0362		35.7912
	'R2'	46.5529		44.2185		39.1687		38.6753		39.5426		41.6501			1 replicate
	'R3'														2 replicates
	'R4'	40.5445		37.9845		33.9319		33.7644		34.1549		36.8014			3 replicates
															4 replicates
	'16NQ37'	32.3583	2.50433	29.5179	2.58607	26.7422	2.20771	26.9962	2.08222	26.7711	2.26539	30.1102	2.05986		5 replicates
	'R1'	34.8627		32.104		28.9499		29.0784		29.0365		32.1701			6 replicates
	'R2'	29.854		26.9318		24.5345		24.9139		24.5057		28.0503			7 replicates
	'R3'														8 replicates
	'R4'														9 replicates
															10 replicates
															11 replicates
															12 replicates

## Sheet: Exclusions
Notes/		Run Date	Mass Spectrometer	Sample Name	Correction Interval	d13C VPDB (Raw)	d13C VPDB (Raw) SE	d18O VPDB (Raw)	d18O VPDB (Raw) SE	d18O VSMOW (Raw)	d18O VSMOW (Raw) SE	d47 WG (Raw)	d47 WG (Raw) SE	D47 WG (Raw)	D47 WG (Raw) SE	d48 WG (Raw)	d48 WG (Raw) SE	D48 WG (Raw)	D48 WG (Raw) SE	d49 WG (Raw)	d49 WG (Raw) SE	D49 WG (Raw)	D49 WG (Raw) SE	d13C VPDB (Final)	d13C VPDB (Final) SD	d18O VPDB (Final)	d18O VPDB (Final) SD	D47 CDES (Final)	D47 CDES (Final) SE	D47 Nonlinearity Slope	Non-linearity correction	D47 WG (HG)	ETF Slope	ETF Intercept	D47 CDES (ETF)	ARF (for 0.082, same as D47 CDES Final)		Winkelstern et al. 2017		Fernandez et al. 2014		Defliese et al. 2015		Kluge et al. 2015		Kelson et al. 2017		Kelson2 et al. 2017
Issues																										carbonate										acid dig corr [0.082]		Temp [°C]	+/- SE	Temp [°C]	+/- SE	Temp [°C]	+/- SE	Temp [°C]	+/- SE	Temp [°C]	+/- SE	Temp [°C]	+/- SE
	'16NQ02'
High water d18O VSMOW SD	'R2'	'2016-11-10 18:40 PST'	'Chewbacca'	'16NQ02'	'2016-10-29 00:00:00 PDT'	-2.69	0	-2.74	0	28.04	0	3.597	0.013	-0.249	0.013	5.848	0.086	0.032	0.085	-0.844	0.705	-7.535	0.703	-2.68		-10.28		0.723		0.00372505	-0.262399	-0.262	1.33493	0.99107	0.641	0.723		18.1615		#REF!		14.8988		14.1415		#REF!		15.0702
	'16NQ04'
High water d18O VSMOW SD	'R2'	'2016-11-08 19:52 PST'	'Chewbacca'	'16NQ04'	'2016-10-29 00:00:00 PDT'	-3.09	0	-3.73	0	27.01	0	2.143	0.011	-0.298	0.009	3.878	0.084	0.066	0.081	-0.623	0.644	-4.937	0.64	-3.08		-11.28		0.665		0.00372505	-0.305983	-0.306	1.33493	0.99107	0.583	0.665		39.7135		#REF!		37.1236		33.2051		#REF!		33.0816
	'16NQ05'
Low T	'R3'	'2016-11-13 17:19 PST'	'Chewbacca'	'16NQ05'	'2016-10-29 00:00:00 PDT'	-0.09	0	1.46	0	32.37	0	10.489	0.012	-0.205	0.012	15.129	0.042	0.803	0.041	-3.736	0.643	-21.252	0.632	-0.07		-6.03		0.747		0.00372505	-0.244072	-0.244	1.33493	0.99107	0.665	0.747		10.4603		#REF!		7.00379		7.23164		#REF!		8.49394
High water d18O VSMOW SD	'R2'	'2016-11-09 21:11 PST'	'Chewbacca'	'16NQ05'	'2016-10-29 00:00:00 PDT'	0.04	0	1.73	0	32.65	0	10.886	0.012	-0.21	0.011	15.59	0.067	0.72	0.065	-1.537	1.222	-19.744	1.202	0.06		-5.76		0.739		0.00372505	-0.250551	-0.25	1.33493	0.99107	0.657	0.739		12.9591		#REF!		9.56291		9.47922		#REF!		10.6357
	'16NQ08'
	'16NQ11'
High water d18O VSMOW SD	'R1'	'2016-11-16 05:51 PST'	'Chewbacca'	'16NQ11'	'2016-10-29 00:00:00 PDT'	-10.7	0	-0.22	0	30.63	0	-1.821	0.018	-0.44	0.017	11.324	0.082	0.46	0.079	2.147	0.833	-1.551	0.829	-10.74		-7.74		0.495		0.00372505	-0.433217	-0.433	1.33493	0.99107	0.413	0.495		148.614		#REF!		152.94		122.977		#REF!		115.069
	'16NQ14'
High T	'R3'	'2016-11-15 22:03 PST'	'Chewbacca'	'16NQ14'	'2016-10-29 00:00:00 PDT'	-4.16	0	-3.09	0	27.67	0	1.58	0.016	-0.479	0.016	5.192	0.069	0.096	0.068	0.059	0.609	-4.47	0.605	-4.16		-10.64		0.426		0.00372505	-0.484886	-0.485	1.33493	0.99107	0.344	0.426		242.783		#REF!		259.281		191.351		#REF!		174.064
	'16NQ19'
High water d18O VSMOW SD	'R1'	'2016-11-11 19:02 PST'	'Chewbacca'	'16NQ19'	'2016-10-29 00:00:00 PDT'	0.68	0	-2.27	0	28.52	0	7.253	0.013	-0.356	0.013	7.067	0.063	0.29	0.063	-1.712	0.836	-12.671	0.827	0.71		-9.8		0.562		0.00372505	-0.383018	-0.383	1.33493	0.99107	0.48	0.562		93.6544		#REF!		93.6869		79.0751		#REF!		75.5817
High water d18O VSMOW SD	'R2'	'2016-11-13 02:39 PST'	'Chewbacca'	'16NQ19'	'2016-10-29 00:00:00 PDT'	0.67	0	-2.2	0	28.59	0	7.327	0.01	-0.344	0.011	7.234	0.071	0.312	0.07	-1.844	0.393	-12.931	0.388	0.7		-9.73		0.578		0.00372505	-0.371293	-0.371	1.33493	0.99107	0.496	0.578		83.4279		#REF!		82.8514		70.5865		#REF!		67.8096
	'16NQ20'
High water d18O VSMOW SD	'R3'	'2016-11-16 16:47 PST'	'Chewbacca'	'16NQ20'	'2016-10-29 00:00:00 PDT'	0.74	0	-2.9	0	27.87	0	6.684	0.014	-0.331	0.014	5.739	0.044	0.234	0.042	-3.571	0.735	-13.317	0.728	0.76		-10.44		0.598		0.00372505	-0.355898	-0.356	1.33493	0.99107	0.516	0.598		71.7718		#REF!		70.5675		60.7914		#REF!		58.7879
	'16NQ21'
	'16NQ22'
High water d18O VSMOW SD	'R1'	'2017-03-19 19:24 PDT'	'Chewbacca'	'16NQ22'	'2017-02-23 01:53:00 PST'	-2.45	0	-1.87	0	28.94	0	10.186	0.013	-0.336	0.012	18.507	0.058	-0.446	0.056	113.48	0.565	91.722	0.555	-2.5		-9.31		0.601		0.00482912	-0.385189	-0.385	1.15636	0.964608	0.519	0.601		70.1201		#REF!		68.8325		59.3932		#REF!		57.4955
	'16NQ23'
High water d18O VSMOW SD	'R1'	'2016-11-12 22:04 PST'	'Chewbacca'	'16NQ23'	'2016-10-29 00:00:00 PDT'	-1.93	0	-1.41	0	29.41	0	5.67	0.014	-0.282	0.014	8.875	0.066	0.375	0.067	-1.729	0.834	-11.808	0.826	-1.91		-8.94		0.669		0.00372505	-0.303121	-0.303	1.33493	0.99107	0.587	0.669		38.0712		#REF!		35.423		31.7668		#REF!		31.7296
	'16NQ25'
High water d18O VSMOW SD	'R1'	'2017-03-19 21:41 PDT'	'Chewbacca'	'16NQ25'	'2017-02-23 01:53:00 PST'	-5.75	0	-3.8	0	26.94	0	5.054	0.011	-0.248	0.012	14.254	0.076	-0.732	0.077	112.348	0.445	98.496	0.438	-5.81		-11.23		0.732		0.00482912	-0.272406	-0.272	1.15636	0.964608	0.65	0.732		15.2006		#REF!		11.8606		11.4908		#REF!		12.5505
	'16NQ26'
High water d18O VSMOW SD	'R3'	'2016-11-18 05:23 PST'	'Chewbacca'	'16NQ26'	'2016-10-29 00:00:00 PDT'	-6.71	0	-0.83	0	30	0	1.606	0.008	-0.281	0.009	10.158	0.055	0.511	0.055	-1.422	0.26	-7.895	0.259	-6.72		-8.35		0.69		0.00372505	-0.286982	-0.287	1.33493	0.99107	0.608	0.69		29.854		#REF!		26.9318		24.5345		#REF!		24.9139
High water d18O VSMOW SD	'R4'	'2017-06-14 18:00 PDT'	'Chewbacca'	'16NQ26'	'2017-05-14 09:00:00 PDT'	-6.68	0	-0.78	0	30.05	0	7.259	0.02	-0.236	0.019	20.563	0.082	-0.576	0.08	139.099	0.835	119.169	0.824	-6.75		-8.33		0.719		0.00481564	-0.270957	-0.27	1.14934	0.947509	0.637	0.719		19.507		#REF!		16.2807		15.3435		#REF!		16.2116
	'16NQ34'
High water d18O VSMOW SD	'R2'	'2017-03-21 23:41 PDT'	'Chewbacca'	'16NQ34'	'2017-02-23 01:53:00 PST'	-0.72	0	-4.45	0.01	26.27	0.01	9.323	0.013	-0.222	0.014	13.042	0.059	-0.651	0.052	123.013	1.068	104.882	1.038	-0.77		-11.87		0.737		0.00482912	-0.267022	-0.267	1.15636	0.964608	0.655	0.737		13.5942		#REF!		10.2137		10.0496		#REF!		11.1789
	'16NQ35'
	'16NQ36'
High water d18O VSMOW SD	'R3'	'2016-11-11 16:54 PST'	'Chewbacca'	'16NQ36'	'2016-10-29 00:00:00 PDT'	-0.55	0	-1.57	0	29.24	0	6.863	0.024	-0.261	0.024	8.689	0.064	0.51	0.064	-3.32	0.651	-14.42	0.643	-0.53		-9.1		0.691		0.00372505	-0.286565	-0.286	1.33493	0.99107	0.609	0.691		29.4787		#REF!		26.5448		24.2028		#REF!		24.6007
	'16NQ37'
High water d18O VSMOW SD	'R3'	'2016-11-15 19:54 PST'	'Chewbacca'	'16NQ37'	'2016-10-29 00:00:00 PDT'	-1.95	0	-2.08	0	28.71	0	4.919	0.017	-0.323	0.016	7.412	0.061	0.272	0.059	-1.11	0.563	-9.841	0.557	-1.93		-9.62		0.617		0.00372505	-0.341324	-0.341	1.33493	0.99107	0.535	0.617		61.6951		#REF!		60.0028		52.2216		#REF!		50.8486
High water d18O VSMOW SD	'R4'	'2017-06-15 00:24 PDT'	'Chewbacca'	'16NQ37'	'2017-05-14 09:00:00 PDT'	-2.14	0	-2.46	0	28.33	0	9.94	0.017	-0.277	0.017	16.964	0.047	-0.78	0.048	138.519	0.326	117.247	0.318	-2.18		-10		0.656		0.00481564	-0.324867	-0.325	1.14934	0.947509	0.574	0.656		43.506		#REF!		41.0551		36.5171		#REF!		36.1906
[truncated: 98 more columns]

## Sheet: Names and Replicates
Project	Sample Name	Replicates	Excluded	Corrected Replicates
Nangqian	'16NQ02'	5	1	4
Nangqian	'16NQ04'	3	1	2
Nangqian	'16NQ05'	5	2	3
Nangqian	'16NQ08'	3	0	3
Nangqian	'16NQ11'	5	1	4
Nangqian	'16NQ14'	3	1	2
Nangqian	'16NQ19'	5	2	3
Nangqian	'16NQ20'	6	1	5
Nangqian	'16NQ21'	4	0	4
Nangqian	'16NQ22'	4	1	3
Nangqian	'16NQ23'	4	1	3
Nangqian	'16NQ25'	5	1	4
Nangqian	'16NQ26'	5	2	3
Nangqian	'16NQ34'	4	1	3
Nangqian	'16NQ35'	4	0	4
Nangqian	'16NQ36'	4	1	3
Nangqian	'16NQ37'	4	2	2

## Sheet: Culled Data
	Run Date	Mass Spectrometer	Sample Name	Correction Interval	d13C VPDB (Raw)	d13C VPDB (Raw) SE	d18O VPDB (Raw)	d18O VPDB (Raw) SE	d18O VSMOW (Raw)	d18O VSMOW (Raw) SE	d47 WG (Raw)	d47 WG (Raw) SE	D47 WG (Raw)	D47 WG (Raw) SE	d48 WG (Raw)	d48 WG (Raw) SE	D48 WG (Raw)	D48 WG (Raw) SE	d49 WG (Raw)	d49 WG (Raw) SE	D49 WG (Raw)	D49 WG (Raw) SE	d13C VPDB (Final)	d13C VPDB (Final) SE	d18O VPDB (Final)	d18O VPDB (Final) SE	D47 CDES (Final)	D47 CDES (Final) SE	D47 Nonlinearity Slope	Non-linearity correction	D47 WG (HG)	ETF Slope	ETF Intercept	D47 CDES (ETF)	ARF (for 0.082, same as D47 CDES Final)	Ghosh	Temp [deg. C]	Temp [deg. C]	Temp [deg. C]	+/- 1 SE	Temp [deg. C]	Temp [deg. C]	+/- 1 SE
[]	[]	[]	[]	[]	[]	[]	[]	[]	[]	[]	[]	[]	[]	[]	[]	[]	[]	[]	[]	[]	[]	[]	[]	[]	[]	[]	[]	[]	[]	[]	[]	[]	[]	[]
'R1'	'2016-11-09 16:48 PST'	'Chewbacca'	'16NQ02'	'2016-10-29 00:00:00 PDT'	-2.68	0	-2.74	0	28.04	0	3.573	0.008	-0.288	0.009	5.966	0.06	0.147	0.059	-0.978	0.378	-7.685	0.375	-2.67	[]	-10.28	[]	0.672	[]	0.00372505	[]	-0.301	1.33493	0.99107	0.59
'R2'	'2016-11-10 18:40 PST'	'Chewbacca'	'16NQ02'	'2016-10-29 00:00:00 PDT'	-2.69	0	-2.74	0	28.04	0	3.597	0.013	-0.249	0.013	5.848	0.086	0.032	0.085	-0.844	0.705	-7.535	0.703	-2.68	[]	-10.28	[]	0.723	[]	0.00372505	[]	-0.262	1.33493	0.99107	0.641
'R3'	'2016-11-10 20:54 PST'	'Chewbacca'	'16NQ02'	'2016-10-29 00:00:00 PDT'	-2.63	0	-2.52	0	28.26	0	3.86	0.018	-0.273	0.018	6.145	0.057	-0.114	0.057	0.926	0.412	-6.28	0.408	-2.62	[]	-10.06	[]	0.689	[]	0.00372505	[]	-0.287	1.33493	0.99107	0.607
'R4'	'2017-06-12 22:29 PDT'	'Chewbacca'	'16NQ02'	'2017-05-14 09:00:00 PDT'	-2.56	0	-2.54	0	28.24	0	9.469	0.011	-0.252	0.01	16.825	0.055	-0.748	0.055	140.016	0.881	119.374	0.869	-2.6	[]	-10.08	[]	0.688	[]	0.00481564	[]	-0.297	1.14934	0.947509	0.606
'R5'	'2017-06-13 22:58 PDT'	'Chewbacca'	'16NQ02'	'2017-05-14 09:00:00 PDT'	-2.63	0	-2.66	0	28.12	0	9.262	0.015	-0.267	0.015	16.561	0.06	-0.773	0.058	142.128	0.51	121.793	0.502	-2.67	[]	-10.2	[]	0.671	[]	0.00481564	[]	-0.312	1.14934	0.947509	0.589
[]	[]	[]	[]	[]	[]	[]	[]	[]	[]	[]	[]	[]	[]	[]	[]	[]	[]	[]	[]	[]	[]	[]	[]	[]	[]	[]	[]	[]	[]	[]	[]	[]	[]	[]
[]	[]	[]	[]	[]	[]	[]	[]	[]	[]	[]	[]	[]	[]	[]	[]	[]	[]	[]	[]	[]	[]	[]	[]	[]	[]	[]	[]	[]	[]	[]	[]	[]	[]	[]
'R1'	'2016-11-07 00:11 PST'	'Chewbacca'	'16NQ04'	'2016-10-29 00:00:00 PDT'	-3.17	0	-3.95	0	26.79	0	1.855	0.014	-0.281	0.012	3.51	0.061	0.142	0.057	-1.707	0.54	-5.494	0.541	-3.17	[]	-11.51	[]	0.689	[]	0.00372505	[]	-0.288	1.33493	0.99107	0.607
'R2'	'2016-11-08 19:52 PST'	'Chewbacca'	'16NQ04'	'2016-10-29 00:00:00 PDT'	-3.09	0	-3.73	0	27.01	0	2.143	0.011	-0.298	0.009	3.878	0.084	0.066	0.081	-0.623	0.644	-4.937	0.64	-3.08	[]	-11.28	[]	0.665	[]	0.00372505	[]	-0.306	1.33493	0.99107	0.583
'R3'	'2016-11-09 19:01 PST'	'Chewbacca'	'16NQ04'	'2016-10-29 00:00:00 PDT'	-3.16	0	-3.93	0	26.8	0	1.881	0.01	-0.285	0.011	3.287	0.057	-0.116	0.057	0.141	0.608	-3.7	0.605	-3.16	[]	-11.49	[]	0.684	[]	0.00372505	[]	-0.292	1.33493	0.99107	0.602
[]	[]	[]	[]	[]	[]	[]	[]	[]	[]	[]	[]	[]	[]	[]	[]	[]	[]	[]	[]	[]	[]	[]	[]	[]	[]	[]	[]	[]	[]	[]	[]	[]	[]	[]
[]	[]	[]	[]	[]	[]	[]	[]	[]	[]	[]	[]	[]	[]	[]	[]	[]	[]	[]	[]	[]	[]	[]	[]	[]	[]	[]	[]	[]	[]	[]	[]	[]	[]	[]
'R1'	'2016-11-08 22:01 PST'	'Chewbacca'	'16NQ05'	'2016-10-29 00:00:00 PDT'	0.02	0	1.7	0	32.61	0	10.812	0.008	-0.232	0.007	15.618	0.068	0.819	0.067	-3.978	0.574	-22.056	0.564	0.05	[]	-5.8	[]	0.71	[]	0.00372505	[]	-0.272	1.33493	0.99107	0.628
'R2'	'2016-11-09 21:11 PST'	'Chewbacca'	'16NQ05'	'2016-10-29 00:00:00 PDT'	0.04	0	1.73	0	32.65	0	10.886	0.012	-0.21	0.011	15.59	0.067	0.72	0.065	-1.537	1.222	-19.744	1.202	0.06	[]	-5.76	[]	0.739	[]	0.00372505	[]	-0.25	1.33493	0.99107	0.657
'R3'	'2016-11-13 17:19 PST'	'Chewbacca'	'16NQ05'	'2016-10-29 00:00:00 PDT'	-0.09	0	1.46	0	32.37	0	10.489	0.012	-0.205	0.012	15.129	0.042	0.803	0.041	-3.736	0.643	-21.252	0.632	-0.07	[]	-6.03	[]	0.747	[]	0.00372505	[]	-0.244	1.33493	0.99107	0.665
'R4'	'2017-06-13 00:38 PDT'	'Chewbacca'	'16NQ05'	'2017-05-14 09:00:00 PDT'	0.02	0	1.61	0	32.52	0	16.316	0.013	-0.206	0.013	25.87	0.068	-0.193	0.066	138.087	0.815	105.393	0.792	-0.01	[]	-5.95	[]	0.703	[]	0.00481564	[]	-0.284	1.14934	0.947509	0.621
'R5'	'2017-06-13 18:45 PDT'	'Chewbacca'	'16NQ05'	'2017-05-14 09:00:00 PDT'	-0.1	0	1.13	0	32.03	0	15.702	0.016	-0.211	0.015	24.587	0.07	-0.498	0.069	143.723	0.78	112.054	0.759	-0.13	[]	-6.42	[]	0.7	[]	0.00481564	[]	-0.286	1.14934	0.947509	0.618
[]	[]	[]	[]	[]	[]	[]	[]	[]	[]	[]	[]	[]	[]	[]	[]	[]	[]	[]	[]	[]	[]	[]	[]	[]	[]	[]	[]	[]	[]	[]	[]	[]	[]	[]
[]	[]	[]	[]	[]	[]	[]	[]	[]	[]	[]	[]	[]	[]	[]	[]	[]	[]	[]	[]	[]	[]	[]	[]	[]	[]	[]	[]	[]	[]	[]	[]	[]	[]	[]
'R1'	'2016-11-09 02:32 PST'	'Chewbacca'	'16NQ08'	'2016-10-29 00:00:00 PDT'	0.65	0	5.49	0	36.52	0	15.315	0.016	-0.237	0.015	23.732	0.051	1.226	0.051	-3.75	0.581	-29.803	0.566	0.68	[]	-1.96	[]	0.68	[]	0.00372505	[]	-0.294	1.33493	0.99107	0.598
'R2'	'2016-11-10 01:41 PST'	'Chewbacca'	'16NQ08'	'2016-10-29 00:00:00 PDT'	0.56	0	5.59	0	36.62	0	15.331	0.014	-0.23	0.013	23.745	0.043	1.045	0.043	-3.35	0.862	-29.51	0.84	0.58	[]	-1.87	[]	0.69	[]	0.00372505	[]	-0.287	1.33493	0.99107	0.608
'R3'	'2016-11-13 19:28 PST'	'Chewbacca'	'16NQ08'	'2016-10-29 00:00:00 PDT'	0.58	0	5.83	0	36.87	0	15.616	0.008	-0.22	0.008	24.661	0.064	1.456	0.063	-3.937	0.592	-30.576	0.577	0.61	[]	-1.62	[]	0.702	[]	0.00372505	[]	-0.278	1.33493	0.99107	0.62
[]	[]	[]	[]	[]	[]	[]	[]	[]	[]	[]	[]	[]	[]	[]	[]	[]	[]	[]	[]	[]	[]	[]	[]	[]	[]	[]	[]	[]	[]	[]	[]	[]	[]	[]
[]	[]	[]	[]	[]	[]	[]	[]	[]	[]	[]	[]	[]	[]	[]	[]	[]	[]	[]	[]	[]	[]	[]	[]	[]	[]	[]	[]	[]	[]	[]	[]	[]	[]	[]
'R1'	'2016-11-16 05:51 PST'	'Chewbacca'	'16NQ11'	'2016-10-29 00:00:00 PDT'	-10.7	0	-0.22	0	30.63	0	-1.821	0.018	-0.44	0.017	11.324	0.082	0.46	0.079	2.147	0.833	-1.551	0.829	-10.74	[]	-7.74	[]	0.495	[]	0.00372505	[]	-0.433	1.33493	0.99107	0.413
'R2'	'2016-11-17 04:01 PST'	'Chewbacca'	'16NQ11'	'2016-10-29 00:00:00 PDT'	-10.8	0	-0.13	0	30.72	0	-1.784	0.015	-0.401	0.015	11.629	0.072	0.584	0.073	0.451	0.723	-3.324	0.72	-10.83	[]	-7.65	[]	0.546	[]	0.00372505	[]	-0.395	1.33493	0.99107	0.464
'R3'	'2016-11-17 18:03 PST'	'Chewbacca'	'16NQ11'	'2016-10-29 00:00:00 PDT'	-10.84	0	0.02	0	30.89	0	-1.656	0.014	-0.391	0.014	11.941	0.059	0.578	0.059	-0.376	0.557	-4.418	0.552	-10.88	[]	-7.49	[]	0.56	[]	0.00372505	[]	-0.384	1.33493	0.99107	0.478
'R4'	'2016-11-17 20:15 PST'	'Chewbacca'	'16NQ11'	'2016-10-29 00:00:00 PDT'	-10.85	0	-0.21	0	30.64	0	-1.914	0.011	-0.394	0.012	11.487	0.069	0.604	0.069	-1.528	0.679	-5.078	0.678	-10.89	[]	-7.73	[]	0.557	[]	0.00372505	[]	-0.387	1.33493	0.99107	0.475
'R5'	'2016-11-18 02:57 PST'	'Chewbacca'	'16NQ11'	'2016-10-29 00:00:00 PDT'	-10.81	0	-0.25	0	30.61	0	-1.917	0.014	-0.402	0.013	11.418	0.061	0.604	0.06	-0.631	0.475	-4.158	0.476	-10.85	[]	-7.76	[]	0.546	[]	0.00372505	[]	-0.395	1.33493	0.99107	0.464
[]	[]	[]	[]	[]	[]	[]	[]	[]	[]	[]	[]	[]	[]	[]	[]	[]	[]	[]	[]	[]	[]	[]	[]	[]	[]	[]	[]	[]	[]	[]	[]	[]	[]	[]
[]	[]	[]	[]	[]	[]	[]	[]	[]	[]	[]	[]	[]	[]	[]	[]	[]	[]	[]	[]	[]	[]	[]	[]	[]	[]	[]	[]	[]	[]	[]	[]	[]	[]	[]
'R1'	'2016-11-09 04:43 PST'	'Chewbacca'	'16NQ14'	'2016-10-29 00:00:00 PDT'	-4.13	0	-3.34	0	27.42	0	1.397	0.013	-0.44	0.013	4.678	0.072	0.082	0.073	-1.357	0.702	-5.417	0.7	-4.12	[]	-10.89	[]	0.479	[]	0.00372505	[]	-0.445	1.33493	0.99107	0.397
'R2'	'2016-11-11 07:05 PST'	'Chewbacca'	'16NQ14'	'2016-10-29 00:00:00 PDT'	-4.22	0	-3.49	0	27.27	0	1.187	0.013	-0.409	0.012	4.086	0.075	-0.217	0.077	0.448	0.585	-3.234	0.585	-4.22	[]	-11.03	[]	0.521	[]	0.00372505	[]	-0.414	1.33493	0.99107	0.439
'R3'	'2016-11-15 22:03 PST'	'Chewbacca'	'16NQ14'	'2016-10-29 00:00:00 PDT'	-4.16	0	-3.09	0	27.67	0	1.58	0.016	-0.479	0.016	5.192	0.069	0.096	0.068	0.059	0.609	-4.47	0.605	-4.16	[]	-10.64	[]	0.426	[]	0.00372505	[]	-0.485	1.33493	0.99107	0.344
[]	[]	[]	[]	[]	[]	[]	[]	[]	[]	[]	[]	[]	[]	[]	[]	[]	[]	[]	[]	[]	[]	[]	[]	[]	[]	[]	[]	[]	[]	[]	[]	[]	[]	[]
[]	[]	[]	[]	[]	[]	[]	[]	[]	[]	[]	[]	[]	[]	[]	[]	[]	[]	[]	[]	[]	[]	[]	[]	[]	[]	[]	[]	[]	[]	[]	[]	[]	[]	[]
'R1'	'2016-11-11 19:02 PST'	'Chewbacca'	'16NQ19'	'2016-10-29 00:00:00 PDT'	0.68	0	-2.27	0	28.52	0	7.253	0.013	-0.356	0.013	7.067	0.063	0.29	0.063	-1.712	0.836	-12.671	0.827	0.71	[]	-9.8	[]	0.562	[]	0.00372505	[]	-0.383	1.33493	0.99107	0.48
'R2'	'2016-11-13 02:39 PST'	'Chewbacca'	'16NQ19'	'2016-10-29 00:00:00 PDT'	0.67	0	-2.2	0	28.59	0	7.327	0.01	-0.344	0.011	7.234	0.071	0.312	0.07	-1.844	0.393	-12.931	0.388	0.7	[]	-9.73	[]	0.578	[]	0.00372505	[]	-0.371	1.33493	0.99107	0.496
'R3'	'2016-11-14 17:15 PST'	'Chewbacca'	'16NQ19'	'2016-10-29 00:00:00 PDT'	0.7	0	-2.05	0	28.74	0	7.515	0.009	-0.329	0.01	7.567	0.052	0.357	0.053	-2.451	0.369	-13.84	0.365	0.72	[]	-9.59	[]	0.597	[]	0.00372505	[]	-0.357	1.33493	0.99107	0.515
'R4'	'2017-06-14 01:08 PDT'	'Chewbacca'	'16NQ19'	'2017-05-14 09:00:00 PDT'	0.71	0	-2.22	0	28.57	0	12.937	0.012	-0.305	0.011	17.485	0.069	-0.752	0.067	141.198	0.683	116.165	0.668	0.68	[]	-9.76	[]	0.608	[]	0.00481564	[]	-0.367	1.14934	0.947509	0.526
'R5'	'2017-06-14 15:53 PDT'	'Chewbacca'	'16NQ19'	'2017-05-14 09:00:00 PDT'	0.75	0	-2.12	0	28.67	0	13.074	0.018	-0.307	0.017	17.811	0.077	-0.625	0.076	139.536	0.622	114.281	0.61	0.72	[]	-9.67	[]	0.605	[]	0.00481564	[]	-0.37	1.14934	0.947509	0.523
[]	[]	[]	[]	[]	[]	[]	[]	[]	[]	[]	[]	[]	[]	[]	[]	[]	[]	[]	[]	[]	[]	[]	[]	[]	[]	[]	[]	[]	[]	[]	[]	[]	[]	[]
[]	[]	[]	[]	[]	[]	[]	[]	[]	[]	[]	[]	[]	[]	[]	[]	[]	[]	[]	[]	[]	[]	[]	[]	[]	[]	[]	[]	[]	[]	[]	[]	[]	[]	[]
'R1'	'2016-11-12 17:42 PST'	'Chewbacca'	'16NQ20'	'2016-10-29 00:00:00 PDT'	0.81	0	-2.72	0	28.06	0	6.926	0.018	-0.348	0.017	6.068	0.061	0.191	0.061	-1.824	0.435	-12.023	0.431	0.84	[]	-10.26	[]	0.574	[]	0.00372505	[]	-0.374	1.33493	0.99107	0.492
'R2'	'2016-11-13 05:00 PST'	'Chewbacca'	'16NQ20'	'2016-10-29 00:00:00 PDT'	0.67	0	-3.04	0	27.72	0	6.43	0.016	-0.37	0.016	5.454	0.053	0.239	0.051	-1.095	0.701	-10.512	0.697	0.7	[]	-10.59	[]	0.547	[]	0.00372505	[]	-0.394	1.33493	0.99107	0.465
'R3'	'2016-11-16 16:47 PST'	'Chewbacca'	'16NQ20'	'2016-10-29 00:00:00 PDT'	0.74	0	-2.9	0	27.87	0	6.684	0.014	-0.331	0.014	5.739	0.044	0.234	0.042	-3.571	0.735	-13.317	0.728	0.76	[]	-10.44	[]	0.598	[]	0.00372505	[]	-0.356	1.33493	0.99107	0.516
'R4'	'2017-03-25 01:30 PDT'	'Chewbacca'	'16NQ20'	'2017-02-23 01:53:00 PST'	0.71	0	-2.81	0	27.97	0	12.263	0.019	-0.378	0.017	16.469	0.083	-0.578	0.078	111.884	2.151	88.768	2.111	0.67	[]	-10.24	[]	0.542	[]	0.00482912	[]	-0.437	1.15636	0.964608	0.46
'R5'	'2017-06-14 03:19 PDT'	'Chewbacca'	'16NQ20'	'2017-05-14 09:00:00 PDT'	0.77	0	-2.9	0	27.87	0	12.252	0.012	-0.346	0.012	16.113	0.082	-0.743	0.083	141.666	0.448	118.077	0.44	0.74	[]	-10.44	[]	0.564	[]	0.00481564	[]	-0.405	1.14934	0.947509	0.482
'R6'	'2017-06-14 22:18 PDT'	'Chewbacca'	'16NQ20'	'2017-05-14 09:00:00 PDT'	0.77	0	-2.96	0	27.81	0	12.208	0.013	-0.336	0.012	15.965	0.044	-0.768	0.042	139.069	0.791	115.66	0.777	0.75	[]	-10.5	[]	0.576	[]	0.00481564	[]	-0.394	1.14934	0.947509	0.494
[]	[]	[]	[]	[]	[]	[]	[]	[]	[]	[]	[]	[]	[]	[]	[]	[]	[]	[]	[]	[]	[]	[]	[]	[]	[]	[]	[]	[]	[]	[]	[]	[]	[]	[]
[]	[]	[]	[]	[]	[]	[]	[]	[]	[]	[]	[]	[]	[]	[]	[]	[]	[]	[]	[]	[]	[]	[]	[]	[]	[]	[]	[]	[]	[]	[]	[]	[]	[]	[]
'R1'	'2016-11-12 19:53 PST'	'Chewbacca'	'16NQ21'	'2016-10-29 00:00:00 PDT'	1.93	0	-1.35	0	29.46	0	9.431	0.017	-0.33	0.016	9.053	0.048	0.425	0.045	-3.467	0.533	-17.433	0.528	1.96	[]	-8.88	[]	0.586	[]	0.00372505	[]	-0.365	1.33493	0.99107	0.504
'R2'	'2016-11-14 22:07 PST'	'Chewbacca'	'16NQ21'	'2016-10-29 00:00:00 PDT'	1.9	0	-1.43	0	29.39	0	9.325	0.01	-0.339	0.009	8.914	0.059	0.43	0.057	-2.242	0.553	-16.062	0.544	1.94	[]	-8.95	[]	0.574	[]	0.00372505	[]	-0.374	1.33493	0.99107	0.492
'R3'	'2016-11-16 18:57 PST'	'Chewbacca'	'16NQ21'	'2016-10-29 00:00:00 PDT'	1.92	0	-1.65	0	29.16	0	9.112	0.01	-0.346	0.011	8.434	0.065	0.394	0.066	-2.6	0.496	-16.001	0.491	1.96	[]	-9.18	[]	0.566	[]	0.00372505	[]	-0.38	1.33493	0.99107	0.484
'R4'	'2017-03-25 20:38 PDT'	'Chewbacca'	'16NQ21'	'2017-02-23 01:53:00 PST'	1.96	0	-1.41	0	29.41	0	14.981	0.01	-0.33	0.01	19.498	0.065	-0.406	0.064	117.363	0.704	89.708	0.686	1.93	[]	-8.86	[]	0.581	[]	0.00482912	[]	-0.402	1.15636	0.964608	0.499
[]	[]	[]	[]	[]	[]	[]	[]	[]	[]	[]	[]	[]	[]	[]	[]	[]	[]	[]	[]	[]	[]	[]	[]	[]	[]	[]	[]	[]	[]	[]	[]	[]	[]	[]
[]	[]	[]	[]	[]	[]	[]	[]	[]	[]	[]	[]	[]	[]	[]	[]	[]	[]	[]	[]	[]	[]	[]	[]	[]	[]	[]	[]	[]	[]	[]	[]	[]	[]	[]
'R1'	'2017-03-19 19:24 PDT'	'Chewbacca'	'16NQ22'	'2017-02-23 01:53:00 PST'	-2.45	0	-1.87	0	28.94	0	10.186	0.013	-0.336	0.012	18.507	0.058	-0.446	0.056	113.48	0.565	91.722	0.555	-2.5	[]	-9.31	[]	0.601	[]	0.00482912	[]	-0.385	1.15636	0.964608	0.519
'R2'	'2017-03-21 17:09 PDT'	'Chewbacca'	'16NQ22'	'2017-02-23 01:53:00 PST'	-2.48	0	-1.87	0	28.93	0	10.169	0.016	-0.315	0.015	18.322	0.078	-0.619	0.077	120.38	0.733	98.535	0.719	-2.53	[]	-9.32	[]	0.625	[]	0.00482912	[]	-0.364	1.15636	0.964608	0.543
'R3'	'2017-03-22 04:08 PDT'	'Chewbacca'	'16NQ22'	'2017-02-23 01:53:00 PST'	-2.59	0	-2.01	0	28.79	0	9.928	0.008	-0.312	0.008	18.204	0.06	-0.462	0.058	114.306	2.29	92.994	2.248	-2.64	[]	-9.45	[]	0.63	[]	0.00482912	[]	-0.36	1.15636	0.964608	0.548
'R4'	'2017-03-23 01:06 PDT'	'Chewbacca'	'16NQ22'	'2017-02-23 01:53:00 PST'	-2.55	0	-1.92	0	28.88	0	10.039	0.014	-0.323	0.013	18.273	0.039	-0.562	0.039	121.189	0.891	99.52	0.876	-2.6	[]	-9.37	[]	0.617	[]	0.00482912	[]	-0.372	1.15636	0.964608	0.535
[]	[]	[]	[]	[]	[]	[]	[]	[]	[]	[]	[]	[]	[]	[]	[]	[]	[]	[]	[]	[]	[]	[]	[]	[]	[]	[]	[]	[]	[]	[]	[]	[]	[]	[]
[]	[]	[]	[]	[]	[]	[]	[]	[]	[]	[]	[]	[]	[]	[]	[]	[]	[]	[]	[]	[]	[]	[]	[]	[]	[]	[]	[]	[]	[]	[]	[]	[]	[]	[]
'R1'	'2016-11-12 22:04 PST'	'Chewbacca'	'16NQ23'	'2016-10-29 00:00:00 PDT'	-1.93	0	-1.41	0	29.41	0	5.67	0.014	-0.282	0.014	8.875	0.066	0.375	0.067	-1.729	0.834	-11.808	0.826	-1.91	[]	-8.94	[]	0.669	[]	0.00372505	[]	-0.303	1.33493	0.99107	0.587
'R2'	'2016-11-15 02:41 PST'	'Chewbacca'	'16NQ23'	'2016-10-29 00:00:00 PDT'	-1.93	0	-1.79	0	29.02	0	5.258	0.013	-0.306	0.013	8.026	0.05	0.291	0.05	-2.176	0.585	-11.502	0.581	-1.91	[]	-9.32	[]	0.639	[]	0.00372505	[]	-0.325	1.33493	0.99107	0.557
'R3'	'2016-11-16 21:09 PST'	'Chewbacca'	'16NQ23'	'2016-10-29 00:00:00 PDT'	-1.81	0	-1.89	0	28.91	0	5.254	0.012	-0.317	0.011	7.901	0.06	0.37	0.06	-2.836	0.659	-12.067	0.654	-1.8	[]	-9.42	[]	0.624	[]	0.00372505	[]	-0.336	1.33493	0.99107	0.542
'R4'	'2017-03-25 22:43 PDT'	'Chewbacca'	'16NQ23'	'2017-02-23 01:53:00 PST'	-1.55	0	-1.59	0	29.22	0	11.372	0.012	-0.306	0.012	19.043	0.057	-0.468	0.055	117.467	0.457	94.054	0.446	-1.6	[]	-9.04	[]	0.63	[]	0.00482912	[]	-0.361	1.15636	0.964608	0.548
[]	[]	[]	[]	[]	[]	[]	[]	[]	[]	[]	[]	[]	[]	[]	[]	[]	[]	[]	[]	[]	[]	[]	[]	[]	[]	[]	[]	[]	[]	[]	[]	[]	[]	[]
[]	[]	[]	[]	[]	[]	[]	[]	[]	[]	[]	[]	[]	[]	[]	[]	[]	[]	[]	[]	[]	[]	[]	[]	[]	[]	[]	[]	[]	[]	[]	[]	[]	[]	[]
'R1'	'2017-03-19 21:41 PDT'	'Chewbacca'	'16NQ25'	'2017-02-23 01:53:00 PST'	-5.75	0	-3.8	0	26.94	0	5.054	0.011	-0.248	0.012	14.254	0.076	-0.732	0.077	112.348	0.445	98.496	0.438	-5.81	[]	-11.23	[]	0.732	[]	0.00482912	[]	-0.272	1.15636	0.964608	0.65
'R2'	'2017-03-21 19:20 PDT'	'Chewbacca'	'16NQ25'	'2017-02-23 01:53:00 PST'	-5.66	0	-3.76	0.01	26.99	0.01	5.136	0.011	-0.298	0.009	14.327	0.045	-0.758	0.041	126.958	2.146	112.721	2.097	-5.73	[]	-11.18	[]	0.674	[]	0.00482912	[]	-0.322	1.15636	0.964608	0.592
'R3'	'2017-03-22 16:24 PDT'	'Chewbacca'	'16NQ25'	'2017-02-23 01:53:00 PST'	-5.67	0	-3.72	0.01	27.02	0.01	5.165	0.018	-0.301	0.015	14.601	0.095	-0.557	0.072	112.55	0.79	98.423	0.761	-5.73	[]	-11.15	[]	0.67	[]	0.00482912	[]	-0.326	1.15636	0.964608	0.588
'R4'	'2017-03-24 16:44 PDT'	'Chewbacca'	'16NQ25'	'2017-02-23 01:53:00 PST'	-5.64	0	-3.77	0.02	26.98	0.02	5.128	0.015	-0.319	0.015	14.696	0.115	-0.373	0.087	117.122	0.86	103.005	0.864	-5.7	[]	-11.19	[]	0.649	[]	0.00482912	[]	-0.344	1.15636	0.964608	0.567
'R5'	'2017-06-13 02:51 PDT'	'Chewbacca'	'16NQ25'	'2017-05-14 09:00:00 PDT'	-5.84	0	-3.83	0	26.92	0	4.884	0.012	-0.31	0.013	14.291	0.055	-0.653	0.056	138.96	0.786	124.923	0.779	-5.9	[]	-11.36	[]	0.646	[]	0.00481564	[]	-0.334	1.14934	0.947509	0.564
[]	[]	[]	[]	[]	[]	[]	[]	[]	[]	[]	[]	[]	[]	[]	[]	[]	[]	[]	[]	[]	[]	[]	[]	[]	[]	[]	[]	[]	[]	[]	[]	[]	[]	[]
[]	[]	[]	[]	[]	[]	[]	[]	[]	[]	[]	[]	[]	[]	[]	[]	[]	[]	[]	[]	[]	[]	[]	[]	[]	[]	[]	[]	[]	[]	[]	[]	[]	[]	[]
'R1'	'2016-11-17 01:34 PST'	'Chewbacca'	'16NQ26'	'2016-10-29 00:00:00 PDT'	-6.61	0	-0.82	0	30.02	0	1.698	0.014	-0.298	0.015	10.216	0.06	0.537	0.058	-1.596	0.507	-8.195	0.503	-6.62	[]	-8.34	[]	0.666	[]	0.00372505	[]	-0.305	1.33493	0.99107	0.584
'R2'	'2016-11-17 22:26 PST'	'Chewbacca'	'16NQ26'	'2016-10-29 00:00:00 PDT'	-6.74	0	-0.76	0	30.08	0	1.62	0.013	-0.311	0.013	10.277	0.056	0.485	0.055	-2.072	0.52	-8.653	0.518	-6.75	[]	-8.28	[]	0.649	[]	0.00372505	[]	-0.318	1.33493	0.99107	0.567
'R3'	'2016-11-18 05:23 PST'	'Chewbacca'	'16NQ26'	'2016-10-29 00:00:00 PDT'	-6.71	0	-0.83	0	30	0	1.606	0.008	-0.281	0.009	10.158	0.055	0.511	0.055	-1.422	0.26	-7.895	0.259	-6.72	[]	-8.35	[]	0.69	[]	0.00372505	[]	-0.287	1.33493	0.99107	0.608
'R4'	'2017-06-14 18:00 PDT'	'Chewbacca'	'16NQ26'	'2017-05-14 09:00:00 PDT'	-6.68	0	-0.78	0	30.05	0	7.259	0.02	-0.236	0.019	20.563	0.082	-0.576	0.08	139.099	0.835	119.169	0.824	-6.75	[]	-8.33	[]	0.719	[]	0.00481564	[]	-0.27	1.14934	0.947509	0.637
'R5'	'2017-06-15 02:33 PDT'	'Chewbacca'	'16NQ26'	'2017-05-14 09:00:00 PDT'	-6.72	0	-0.8	0	30.03	0	7.148	0.01	-0.286	0.01	20.542	0.074	-0.558	0.074	140.486	0.748	120.622	0.736	-6.79	[]	-8.35	[]	0.662	[]	0.00481564	[]	-0.32	1.14934	0.947509	0.58
[]	[]	[]	[]	[]	[]	[]	[]	[]	[]	[]	[]	[]	[]	[]	[]	[]	[]	[]	[]	[]	[]	[]	[]	[]	[]	[]	[]	[]	[]	[]	[]	[]	[]	[]
[]	[]	[]	[]	[]	[]	[]	[]	[]	[]	[]	[]	[]	[]	[]	[]	[]	[]	[]	[]	[]	[]	[]	[]	[]	[]	[]	[]	[]	[]	[]	[]	[]	[]	[]
'R1'	'2017-03-20 00:05 PDT'	'Chewbacca'	'16NQ34'	'2017-02-23 01:53:00 PST'	-0.68	0	-4.37	0.01	26.36	0.01	9.401	0.016	-0.269	0.017	13.227	0.111	-0.634	0.095	108.639	0.622	90.515	0.622	-0.73	[]	-11.79	[]	0.684	[]	0.00482912	[]	-0.314	1.15636	0.964608	0.602
'R2'	'2017-03-21 23:41 PDT'	'Chewbacca'	'16NQ34'	'2017-02-23 01:53:00 PST'	-0.72	0	-4.45	0.01	26.27	0.01	9.323	0.013	-0.222	0.014	13.042	0.059	-0.651	0.052	123.013	1.068	104.882	1.038	-0.77	[]	-11.87	[]	0.737	[]	0.00482912	[]	-0.267	1.15636	0.964608	0.655
'R3'	'2017-03-22 18:34 PDT'	'Chewbacca'	'16NQ34'	'2017-02-23 01:53:00 PST'	-0.66	0	-4.33	0.01	26.4	0.01	9.459	0.014	-0.272	0.011	13.52	0.065	-0.432	0.059	112.165	2.173	93.87	2.128	-0.71	[]	-11.75	[]	0.679	[]	0.00482912	[]	-0.318	1.15636	0.964608	0.597
'R4'	'2017-03-24 18:56 PDT'	'Chewbacca'	'16NQ34'	'2017-02-23 01:53:00 PST'	-0.66	0	-4.19	0	26.54	0	9.599	0.017	-0.279	0.017	13.669	0.044	-0.564	0.045	123.983	2.184	105.182	2.141	-0.71	[]	-11.61	[]	0.671	[]	0.00482912	[]	-0.325	1.15636	0.964608	0.589
[]	[]	[]	[]	[]	[]	[]	[]	[]	[]	[]	[]	[]	[]	[]	[]	[]	[]	[]	[]	[]	[]	[]	[]	[]	[]	[]	[]	[]	[]	[]	[]	[]	[]	[]
[]	[]	[]	[]	[]	[]	[]	[]	[]	[]	[]	[]	[]	[]	[]	[]	[]	[]	[]	[]	[]	[]	[]	[]	[]	[]	[]	[]	[]	[]	[]	[]	[]	[]	[]
'R1'	'2017-03-20 02:30 PDT'	'Chewbacca'	'16NQ35'	'2017-02-23 01:53:00 PST'	-2.69	0	3.67	0.01	34.64	0.01	15.737	0.015	-0.247	0.008	29.273	0.226	-0.973	0.206	124.402	1.463	90.578	1.434	-2.74	[]	-3.84	[]	0.674	[]	0.00482912	[]	-0.323	1.15636	0.964608	0.592
'R2'	'2017-03-22 01:59 PDT'	'Chewbacca'	'16NQ35'	'2017-02-23 01:53:00 PST'	-2.68	0	3.69	0	34.66	0	15.774	0.007	-0.244	0.007	30.312	0.063	-0.005	0.061	131.767	0.905	97.661	0.878	-2.73	[]	-3.82	[]	0.676	[]	0.00482912	[]	-0.321	1.15636	0.964608	0.594
'R3'	'2017-03-22 22:59 PDT'	'Chewbacca'	'16NQ35'	'2017-02-23 01:53:00 PST'	-2.68	0	3.8	0	34.77	0	15.91	0.009	-0.224	0.009	30.597	0.05	0.051	0.048	125.612	0.934	91.448	0.906	-2.73	[]	-3.71	[]	0.699	[]	0.00482912	[]	-0.301	1.15636	0.964608	0.617
'R4'	'2017-03-24 23:22 PDT'	'Chewbacca'	'16NQ35'	'2017-02-23 01:53:00 PST'	-2.63	0	3.83	0	34.81	0	15.972	0.011	-0.245	0.01	30.757	0.065	0.135	0.064	126.358	1.415	92.042	1.372	-2.68	[]	-3.68	[]	0.674	[]	0.00482912	[]	-0.322	1.15636	0.964608	0.592
[]	[]	[]	[]	[]	[]	[]	[]	[]	[]	[]	[]	[]	[]	[]	[]	[]	[]	[]	[]	[]	[]	[]	[]	[]	[]	[]	[]	[]	[]	[]	[]	[]	[]	[]
[]	[]	[]	[]	[]	[]	[]	[]	[]	[]	[]	[]	[]	[]	[]	[]	[]	[]	[]	[]	[]	[]	[]	[]	[]	[]	[]	[]	[]	[]	[]	[]	[]	[]	[]
'R1'	'2016-11-07 02:33 PST'	'Chewbacca'	'16NQ36'	'2016-10-29 00:00:00 PDT'	-0.53	0	-1.51	0	29.3	0	6.932	0.01	-0.279	0.01	8.598	0.047	0.299	0.047	-2.11	0.716	-13.369	0.711	-0.51	[]	-9.04	[]	0.666	[]	0.00372505	[]	-0.305	1.33493	0.99107	0.584
'R2'	'2016-11-08 17:42 PST'	'Chewbacca'	'16NQ36'	'2016-10-29 00:00:00 PDT'	-0.53	0	-1.76	0	29.04	0	6.661	0.013	-0.293	0.013	7.999	0.058	0.207	0.059	-3.245	0.676	-13.995	0.671	-0.5	[]	-9.29	[]	0.649	[]	0.00372505	[]	-0.318	1.33493	0.99107	0.567
'R3'	'2016-11-11 16:54 PST'	'Chewbacca'	'16NQ36'	'2016-10-29 00:00:00 PDT'	-0.55	0	-1.57	0	29.24	0	6.863	0.024	-0.261	0.024	8.689	0.064	0.51	0.064	-3.32	0.651	-14.42	0.643	-0.53	[]	-9.1	[]	0.691	[]	0.00372505	[]	-0.286	1.33493	0.99107	0.609
'R4'	'2017-06-13 16:36 PDT'	'Chewbacca'	'16NQ36'	'2017-05-14 09:00:00 PDT'	-0.52	0	-1.52	0	29.3	0	12.516	0.011	-0.259	0.011	19.022	0.048	-0.652	0.047	143.932	0.985	118.624	0.964	-0.55	[]	-9.06	[]	0.663	[]	0.00481564	[]	-0.319	1.14934	0.947509	0.581
[]	[]	[]	[]	[]	[]	[]	[]	[]	[]	[]	[]	[]	[]	[]	[]	[]	[]	[]	[]	[]	[]	[]	[]	[]	[]	[]	[]	[]	[]	[]	[]	[]	[]	[]
[]	[]	[]	[]	[]	[]	[]	[]	[]	[]	[]	[]	[]	[]	[]	[]	[]	[]	[]	[]	[]	[]	[]	[]	[]	[]	[]	[]	[]	[]	[]	[]	[]	[]	[]
'R1'	'2016-11-10 23:04 PST'	'Chewbacca'	'16NQ37'	'2016-10-29 00:00:00 PDT'	-2.21	0	-2.51	0	28.28	0	4.27	0.008	-0.281	0.007	6.151	0.056	-0.132	0.057	0.394	0.7	-7.245	0.694	-2.2	[]	-10.04	[]	0.677	[]	0.00372505	[]	-0.297	1.33493	0.99107	0.595
'R2'	'2016-11-14 04:39 PST'	'Chewbacca'	'16NQ37'	'2016-10-29 00:00:00 PDT'	-2.17	0	-2.55	0	28.23	0	4.281	0.016	-0.271	0.014	6.547	0.028	0.344	0.026	-2.225	0.747	-9.806	0.745	-2.16	[]	-10.09	[]	0.69	[]	0.00372505	[]	-0.287	1.33493	0.99107	0.608
'R3'	'2016-11-15 19:54 PST'	'Chewbacca'	'16NQ37'	'2016-10-29 00:00:00 PDT'	-1.95	0	-2.08	0	28.71	0	4.919	0.017	-0.323	0.016	7.412	0.061	0.272	0.059	-1.11	0.563	-9.841	0.557	-1.93	[]	-9.62	[]	0.617	[]	0.00372505	[]	-0.341	1.33493	0.99107	0.535
'R4'	'2017-06-15 00:24 PDT'	'Chewbacca'	'16NQ37'	'2017-05-14 09:00:00 PDT'	-2.14	0	-2.46	0	28.33	0	9.94	0.017	-0.277	0.017	16.964	0.047	-0.78	0.048	138.519	0.326	117.247	0.318	-2.18	[]	-10	[]	0.656	[]	0.00481564	[]	-0.325	1.14934	0.947509	0.574

## Sheet: Original Data
	ID	Analysis	Analysis Status	Disabled	Identifier_1	Run	Mass Spec	Easotope Name	Sample Type	Corr Interval	Acid Temp	Acquisitions	Enabled Acquisitions	d13C VPDB (Raw)	d13C VPDB (Raw) SD	d13C VPDB (Raw) SE	d18O VPDB (Raw)	d18O VPDB (Raw) SD	d18O VPDB (Raw) SE	d18O VSMOW (Raw)	d18O VSMOW (Raw) SD	d18O VSMOW (Raw) SE	d45 WG (Raw)	d45 WG (Raw) SD	d45 WG (Raw) SE	d46 WG (Raw)	d46 WG (Raw) SD	d46 WG (Raw) SE	d47 WG (Raw)	d47 WG (Raw) SD	d47 WG (Raw) SE	D47 WG (Raw)	D47 WG (Raw) SD	D47 WG (Raw) SE	d48 WG (Raw)	d48 WG (Raw) SD	d48 WG (Raw) SE	D48 WG (Raw)	D48 WG (Raw) SD	D48 WG (Raw) SE	d49 WG (Raw)	d49 WG (Raw) SD	d49 WG (Raw) SE	D49 WG (Raw)	D49 WG (Raw) SD	D49 WG (Raw) SE	49 Param	49 Param SD	49 Param SE
S2	16NQ02	CO2 clumped	OK
R1	2016-11-09 16:48 PST	CO2 clumped	OK	FALSE	16NQ02		Chewbacca	16NQ02	Calcite	2016-09-07 00:00:00 PDT	90	9	9	-2.68	0	0	-2.74	0.01	0	28.04	0.01	0	0.972	0.003	0.001	2.905	0.006	0.002	3.573	0.024	0.008	-0.288	0.027	0.009	5.966	0.18	0.06	0.147	0.177	0.059	-0.978	1.133	0.378	-7.685	1.125	0.375	0.008	0.01	0.003
R2	2016-11-10 18:40 PST	CO2 clumped	OK	FALSE	16NQ02		Chewbacca	16NQ02	Calcite	2016-09-07 00:00:00 PDT	90	9	9	-2.69	0	0	-2.74	0.01	0	28.04	0.01	0	0.959	0.002	0.001	2.904	0.007	0.002	3.597	0.038	0.013	-0.249	0.04	0.013	5.848	0.259	0.086	0.032	0.255	0.085	-0.844	2.116	0.705	-7.535	2.109	0.703	0.007	0.018	0.006
R3	2016-11-10 20:54 PST	CO2 clumped	OK	FALSE	16NQ02		Chewbacca	16NQ02	Calcite	2016-09-07 00:00:00 PDT	90	9	9	-2.63	0	0	-2.52	0	0	28.26	0	0	1.026	0.003	0.001	3.125	0.003	0.001	3.86	0.054	0.018	-0.273	0.053	0.018	6.145	0.17	0.057	-0.114	0.17	0.057	0.926	1.235	0.412	-6.28	1.225	0.408	-0.008	0.01	0.003
R4	2017-06-12 22:29 PDT	CO2 clumped	OK	FALSE	16NQ02		Chewbacca	16NQ02	Calcite	2017-03-03 00:00:00 PST	90	9	9	-2.56	0	0	-2.54	0.01	0	28.24	0.01	0	1.073	0.003	0.001	8.755	0.006	0.002	9.469	0.032	0.011	-0.252	0.031	0.01	16.825	0.165	0.055	-0.748	0.165	0.055	140.016	2.644	0.881	119.374	2.607	0.869	-1.14	0.018	0.006
R5	2017-06-13 22:58 PDT	CO2 clumped	OK	FALSE	16NQ02		Chewbacca	16NQ02	Calcite	2017-03-03 00:00:00 PST	90	9	9	-2.63	0	0	-2.66	0.01	0	28.12	0.01	0	1	0.002	0.001	8.637	0.006	0.002	9.262	0.044	0.015	-0.267	0.046	0.015	16.561	0.179	0.06	-0.773	0.173	0.058	142.128	1.53	0.51	121.793	1.506	0.502	-1.187	0.012	0.004
S3	16NQ04	CO2 clumped	OK
R1	2016-11-07 00:11 PST	CO2 clumped	OK	FALSE	16NQ04		Chewbacca	16NQ04	Calcite	2016-09-07 00:00:00 PDT	90	9	9	-3.17	0	0	-3.95	0.01	0	26.79	0.01	0	0.467	0.002	0.001	1.682	0.011	0.004	1.855	0.041	0.014	-0.281	0.036	0.012	3.51	0.182	0.061	0.142	0.172	0.057	-1.707	1.621	0.54	-5.494	1.624	0.541	0.014	0.014	0.005
R2	2016-11-08 19:52 PST	CO2 clumped	OK	FALSE	16NQ04		Chewbacca	16NQ04	Calcite	2016-09-07 00:00:00 PDT	90	9	9	-3.09	0	0	-3.73	0.01	0	27.01	0.01	0	0.552	0.001	0	1.904	0.007	0.002	2.143	0.032	0.011	-0.298	0.028	0.009	3.878	0.251	0.084	0.066	0.244	0.081	-0.623	1.933	0.644	-4.937	1.919	0.64	0.005	0.016	0.005
R3	2016-11-09 19:01 PST	CO2 clumped	OK	FALSE	16NQ04		Chewbacca	16NQ04	Calcite	2016-09-07 00:00:00 PDT	90	9	9	-3.16	0	0	-3.93	0.01	0	26.8	0.01	0	0.478	0.003	0.001	1.7	0.005	0.002	1.881	0.03	0.01	-0.285	0.032	0.011	3.287	0.171	0.057	-0.116	0.17	0.057	0.141	1.824	0.608	-3.7	1.815	0.605	-0.001	0.015	0.005
S4	16NQ05	CO2 clumped	OK
R1	2016-11-08 22:01 PST	CO2 clumped	OK	FALSE	16NQ05		Chewbacca	16NQ05	Calcite	2016-09-07 00:00:00 PDT	90	9	9	0.02	0	0	1.7	0	0	32.61	0	0	3.661	0.003	0.001	7.366	0.003	0.001	10.812	0.023	0.008	-0.232	0.022	0.007	15.618	0.205	0.068	0.819	0.201	0.067	-3.978	1.722	0.574	-22.056	1.693	0.564	0.033	0.014	0.005
R2	2016-11-09 21:11 PST	CO2 clumped	OK	FALSE	16NQ05		Chewbacca	16NQ05	Calcite	2016-09-07 00:00:00 PDT	90	9	9	0.04	0	0	1.73	0.01	0	32.65	0.01	0	3.676	0.002	0.001	7.403	0.007	0.002	10.886	0.037	0.012	-0.21	0.034	0.011	15.59	0.2	0.067	0.72	0.194	0.065	-1.537	3.667	1.222	-19.744	3.606	1.202	0.013	0.031	0.01
R3	2016-11-13 17:19 PST	CO2 clumped	OK	FALSE	16NQ05		Chewbacca	16NQ05	Calcite	2016-09-07 00:00:00 PDT	90	9	9	-0.09	0	0	1.46	0	0	32.37	0	0	3.547	0.004	0.001	7.132	0.002	0.001	10.489	0.036	0.012	-0.205	0.035	0.012	15.129	0.126	0.042	0.803	0.122	0.041	-3.736	1.93	0.643	-21.252	1.896	0.632	0.033	0.017	0.006
R4	2017-06-13 00:38 PDT	CO2 clumped	OK	FALSE	16NQ05		Chewbacca	16NQ05	Calcite	2017-03-03 00:00:00 PST	90	9	9	0.02	0	0	1.61	0	0	32.52	0	0	3.631	0.004	0.001	12.95	0.004	0.001	16.316	0.038	0.013	-0.206	0.039	0.013	25.87	0.204	0.068	-0.193	0.197	0.066	138.087	2.445	0.815	105.393	2.377	0.792	-1.133	0.016	0.005
R5	2017-06-13 18:45 PDT	CO2 clumped	OK	FALSE	16NQ05		Chewbacca	16NQ05	Calcite	2017-03-03 00:00:00 PST	90	9	9	-0.1	0	0	1.13	0.01	0	32.03	0.01	0	3.501	0.003	0.001	12.471	0.006	0.002	15.702	0.048	0.016	-0.211	0.045	0.015	24.587	0.21	0.07	-0.498	0.206	0.069	143.723	2.339	0.78	112.054	2.277	0.759	-1.179	0.018	0.006
S5	16NQ08	CO2 clumped	OK
R1	2016-11-09 02:32 PST	CO2 clumped	OK	FALSE	16NQ08		Chewbacca	16NQ08	Calcite	2016-09-07 00:00:00 PDT	90	9	9	0.65	0	0	5.49	0.01	0	36.52	0.01	0	4.38	0.002	0.001	11.177	0.005	0.002	15.315	0.047	0.016	-0.237	0.046	0.015	23.732	0.152	0.051	1.226	0.152	0.051	-3.75	1.743	0.581	-29.803	1.698	0.566	0.031	0.015	0.005
R2	2016-11-10 01:41 PST	CO2 clumped	OK	FALSE	16NQ08		Chewbacca	16NQ08	Calcite	2016-09-07 00:00:00 PDT	90	9	9	0.56	0	0	5.59	0.01	0	36.62	0.01	0	4.295	0.004	0.001	11.275	0.005	0.002	15.331	0.041	0.014	-0.23	0.039	0.013	23.745	0.129	0.043	1.045	0.129	0.043	-3.35	2.585	0.862	-29.51	2.52	0.84	0.028	0.022	0.007
R3	2016-11-13 19:28 PST	CO2 clumped	OK	FALSE	16NQ08		Chewbacca	16NQ08	Calcite	2016-09-07 00:00:00 PDT	90	9	9	0.58	0	0	5.83	0	0	36.87	0	0	4.327	0.003	0.001	11.519	0.004	0.001	15.616	0.024	0.008	-0.22	0.025	0.008	24.661	0.192	0.064	1.456	0.189	0.063	-3.937	1.777	0.592	-30.576	1.731	0.577	0.034	0.015	0.005
S6	16NQ11	CO2 clumped	OK
R1	2016-11-16 05:51 PST	CO2 clumped	OK	FALSE	16NQ11		Chewbacca	16NQ11	Calcite	2016-09-07 00:00:00 PDT	90	9	9	-10.7	0	0	-0.22	0.01	0	30.63	0.01	0	-6.465	0.002	0.001	5.415	0.005	0.002	-1.821	0.053	0.018	-0.44	0.051	0.017	11.324	0.245	0.082	0.46	0.238	0.079	2.147	2.499	0.833	-1.551	2.488	0.829	-0.018	0.021	0.007
R2	2016-11-17 04:01 PST	CO2 clumped	OK	FALSE	16NQ11		Chewbacca	16NQ11	Calcite	2016-09-07 00:00:00 PDT	90	9	9	-10.8	0	0	-0.13	0	0	30.72	0	0	-6.55	0.002	0.001	5.504	0.003	0.001	-1.784	0.045	0.015	-0.401	0.045	0.015	11.629	0.215	0.072	0.584	0.218	0.073	0.451	2.168	0.723	-3.324	2.16	0.72	-0.004	0.019	0.006
R3	2016-11-17 18:03 PST	CO2 clumped	OK	FALSE	16NQ11		Chewbacca	16NQ11	Calcite	2016-09-07 00:00:00 PDT	90	9	9	-10.84	0	0	0.02	0.01	0	30.89	0.01	0	-6.586	0.003	0.001	5.662	0.009	0.003	-1.656	0.043	0.014	-0.391	0.041	0.014	11.941	0.176	0.059	0.578	0.177	0.059	-0.376	1.672	0.557	-4.418	1.656	0.552	0.003	0.015	0.005
R4	2016-11-17 20:15 PST	CO2 clumped	OK	FALSE	16NQ11		Chewbacca	16NQ11	Calcite	2016-09-07 00:00:00 PDT	90	9	9	-10.85	0	0	-0.21	0	0	30.64	0	0	-6.607	0.002	0.001	5.423	0.004	0.001	-1.914	0.033	0.011	-0.394	0.036	0.012	11.487	0.208	0.069	0.604	0.207	0.069	-1.528	2.037	0.679	-5.078	2.035	0.678	0.013	0.018	0.006
R5	2016-11-18 02:57 PST	CO2 clumped	OK	FALSE	16NQ11		Chewbacca	16NQ11	Calcite	2016-09-07 00:00:00 PDT	90	9	9	-10.81	0	0	-0.25	0.01	0	30.61	0.01	0	-6.57	0.003	0.001	5.389	0.007	0.002	-1.917	0.041	0.014	-0.402	0.038	0.013	11.418	0.184	0.061	0.604	0.18	0.06	-0.631	1.426	0.475	-4.158	1.428	0.476	0.006	0.012	0.004
S7	16NQ14	CO2 clumped	OK
R1	2016-11-09 04:43 PST	CO2 clumped	OK	FALSE	16NQ14		Chewbacca	16NQ14	Calcite	2016-09-07 00:00:00 PDT	90	9	9	-4.13	0	0	-3.34	0.01	0	27.42	0.01	0	-0.405	0.002	0.001	2.295	0.006	0.002	1.397	0.04	0.013	-0.44	0.039	0.013	4.678	0.216	0.072	0.082	0.219	0.073	-1.357	2.106	0.702	-5.417	2.101	0.7	0.011	0.018	0.006
R2	2016-11-11 07:05 PST	CO2 clumped	OK	FALSE	16NQ14		Chewbacca	16NQ14	Calcite	2016-09-07 00:00:00 PDT	90	9	9	-4.22	0	0	-3.49	0	0	27.27	0	0	-0.5	0.003	0.001	2.15	0.005	0.002	1.187	0.038	0.013	-0.409	0.035	0.012	4.086	0.225	0.075	-0.217	0.231	0.077	0.448	1.756	0.585	-3.234	1.755	0.585	-0.004	0.015	0.005
R3	2016-11-15 22:03 PST	CO2 clumped	OK	FALSE	16NQ14		Chewbacca	16NQ14	Calcite	2016-09-07 00:00:00 PDT	90	9	9	-4.16	0	0	-3.09	0.01	0	27.67	0.01	0	-0.427	0.003	0.001	2.545	0.006	0.002	1.58	0.047	0.016	-0.479	0.047	0.016	5.192	0.206	0.069	0.096	0.203	0.068	0.059	1.827	0.609	-4.47	1.816	0.605	0	0.015	0.005
S8	16NQ19	CO2 clumped	OK
R1	2016-11-11 19:02 PST	CO2 clumped	OK	FALSE	16NQ19		Chewbacca	16NQ19	Calcite	2016-09-07 00:00:00 PDT	90	9	9	0.68	0	0	-2.27	0.01	0	28.52	0.01	0	4.142	0.002	0.001	3.382	0.005	0.002	7.253	0.038	0.013	-0.356	0.039	0.013	7.067	0.19	0.063	0.29	0.189	0.063	-1.712	2.507	0.836	-12.671	2.482	0.827	0.015	0.021	0.007
R2	2016-11-13 02:39 PST	CO2 clumped	OK	FALSE	16NQ19		Chewbacca	16NQ19	Calcite	2016-09-07 00:00:00 PDT	90	9	9	0.67	0	0	-2.2	0.01	0	28.59	0.01	0	4.133	0.001	0	3.454	0.006	0.002	7.327	0.029	0.01	-0.344	0.033	0.011	7.234	0.213	0.071	0.312	0.21	0.07	-1.844	1.178	0.393	-12.931	1.165	0.388	0.016	0.01	0.003
R3	2016-11-14 17:15 PST	CO2 clumped	OK	FALSE	16NQ19		Chewbacca	16NQ19	Calcite	2016-09-07 00:00:00 PDT	90	9	9	0.7	0	0	-2.05	0	0	28.74	0	0	4.163	0.003	0.001	3.598	0.005	0.002	7.515	0.028	0.009	-0.329	0.029	0.01	7.567	0.155	0.052	0.357	0.159	0.053	-2.451	1.106	0.369	-13.84	1.095	0.365	0.021	0.01	0.003
R4	2017-06-14 01:08 PDT	CO2 clumped	OK	FALSE	16NQ19		Chewbacca	16NQ19	Calcite	2017-03-03 00:00:00 PST	90	9	9	0.71	0	0	-2.22	0	0	28.57	0	0	4.145	0.003	0.001	9.084	0.005	0.002	12.937	0.036	0.012	-0.305	0.032	0.011	17.485	0.206	0.069	-0.752	0.201	0.067	141.198	2.049	0.683	116.165	2.005	0.668	-1.185	0.013	0.004
R5	2017-06-14 15:53 PDT	CO2 clumped	OK	FALSE	16NQ19		Chewbacca	16NQ19	Calcite	2017-03-03 00:00:00 PST	90	9	9	0.75	0	0	-2.12	0.01	0	28.67	0.01	0	4.186	0.002	0.001	9.182	0.006	0.002	13.074	0.054	0.018	-0.307	0.051	0.017	17.811	0.23	0.077	-0.625	0.227	0.076	139.536	1.866	0.622	114.281	1.831	0.61	-1.162	0.015	0.005
S9	16NQ20	CO2 clumped	OK
R1	2016-11-12 17:42 PST	CO2 clumped	OK	FALSE	16NQ20		Chewbacca	16NQ20	Calcite	2016-09-07 00:00:00 PDT	90	9	9	0.81	0	0	-2.72	0.01	0	28.06	0.01	0	4.245	0.003	0.001	2.934	0.006	0.002	6.926	0.053	0.018	-0.348	0.051	0.017	6.068	0.183	0.061	0.191	0.182	0.061	-1.824	1.305	0.435	-12.023	1.294	0.431	0.016	0.011	0.004
R2	2016-11-13 05:00 PST	CO2 clumped	OK	FALSE	16NQ20		Chewbacca	16NQ20	Calcite	2016-09-07 00:00:00 PDT	90	9	9	0.67	0	0	-3.04	0.01	0	27.72	0.01	0	4.102	0.003	0.001	2.604	0.005	0.002	6.43	0.049	0.016	-0.37	0.049	0.016	5.454	0.158	0.053	0.239	0.152	0.051	-1.095	2.104	0.701	-10.512	2.09	0.697	0.01	0.018	0.006
R3	2016-11-16 16:47 PST	CO2 clumped	OK	FALSE	16NQ20		Chewbacca	16NQ20	Calcite	2016-09-07 00:00:00 PDT	90	9	9	0.74	0	0	-2.9	0.01	0	27.87	0.01	0	4.171	0.002	0.001	2.748	0.007	0.002	6.684	0.042	0.014	-0.331	0.042	0.014	5.739	0.132	0.044	0.234	0.127	0.042	-3.571	2.205	0.735	-13.317	2.184	0.728	0.031	0.019	0.006
R4	2017-03-25 01:30 PDT	CO2 clumped	OK	FALSE	16NQ20		Chewbacca	16NQ20	Calcite	2017-03-03 00:00:00 PST	90	9	9	0.71	0	0	-2.81	0.01	0	27.97	0.01	0	4.13	0.003	0.001	8.492	0.008	0.003	12.263	0.056	0.019	-0.378	0.052	0.017	16.469	0.249	0.083	-0.578	0.235	0.078	111.884	6.454	2.151	88.768	6.332	2.111	-1.094	0.019	0.006
R5	2017-06-14 03:19 PDT	CO2 clumped	OK	FALSE	16NQ20		Chewbacca	16NQ20	Calcite	2017-03-03 00:00:00 PST	90	9	9	0.77	0	0	-2.9	0	0	27.87	0	0	4.177	0.003	0.001	8.399	0.004	0.001	12.252	0.037	0.012	-0.346	0.037	0.012	16.113	0.245	0.082	-0.743	0.248	0.083	141.666	1.344	0.448	118.077	1.32	0.44	-1.18	0.011	0.004
R6	2017-06-14 22:18 PDT	CO2 clumped	OK	FALSE	16NQ20		Chewbacca	16NQ20	Calcite	2017-03-03 00:00:00 PST	90	9	9	0.77	0	0	-2.96	0.01	0	27.81	0.01	0	4.183	0.003	0.001	8.338	0.009	0.003	12.208	0.039	0.013	-0.336	0.037	0.012	15.965	0.133	0.044	-0.768	0.125	0.042	139.069	2.372	0.791	115.66	2.33	0.777	-1.171	0.017	0.006
S10	16NQ21	CO2 clumped	OK
R1	2016-11-12 19:53 PST	CO2 clumped	OK	FALSE	16NQ21		Chewbacca	16NQ21	Calcite	2016-09-07 00:00:00 PDT	90	9	9	1.93	0	0	-1.35	0.01	0	29.46	0.01	0	5.341	0.002	0.001	4.303	0.006	0.002	9.431	0.051	0.017	-0.33	0.048	0.016	9.053	0.145	0.048	0.425	0.136	0.045	-3.467	1.6	0.533	-17.433	1.585	0.528	0.03	0.014	0.005
R2	2016-11-14 22:07 PST	CO2 clumped	OK	FALSE	16NQ21		Chewbacca	16NQ21	Calcite	2016-09-07 00:00:00 PDT	90	9	9	1.9	0	0	-1.43	0.01	0	29.39	0.01	0	5.317	0.001	0	4.231	0.007	0.002	9.325	0.029	0.01	-0.339	0.028	0.009	8.914	0.176	0.059	0.43	0.171	0.057	-2.242	1.66	0.553	-16.062	1.633	0.544	0.019	0.014	0.005
R3	2016-11-16 18:57 PST	CO2 clumped	OK	FALSE	16NQ21		Chewbacca	16NQ21	Calcite	2016-09-07 00:00:00 PDT	90	9	9	1.92	0	0	-1.65	0.01	0	29.16	0.01	0	5.329	0.003	0.001	4.01	0.006	0.002	9.112	0.029	0.01	-0.346	0.032	0.011	8.434	0.196	0.065	0.394	0.197	0.066	-2.6	1.489	0.496	-16.001	1.474	0.491	0.023	0.013	0.004
R4	2017-03-25 20:38 PDT	CO2 clumped	OK	FALSE	16NQ21		Chewbacca	16NQ21	Calcite	2017-03-03 00:00:00 PST	90	9	9	1.96	0	0	-1.41	0	0	29.41	0	0	5.353	0.002	0.001	9.907	0.002	0.001	14.981	0.03	0.01	-0.33	0.03	0.01	19.498	0.196	0.065	-0.406	0.192	0.064	117.363	2.112	0.704	89.708	2.058	0.686	-1.065	0.018	0.006
S11	16NQ22	CO2 clumped	OK
R1	2017-03-19 19:24 PDT	CO2 clumped	OK	FALSE	16NQ22		Chewbacca	16NQ22	Calcite	2017-03-03 00:00:00 PST	90	9	9	-2.45	0	0	-1.87	0	0	28.94	0	0	1.199	0.003	0.001	9.436	0.003	0.001	10.186	0.038	0.013	-0.336	0.037	0.012	18.507	0.173	0.058	-0.446	0.167	0.056	113.48	1.694	0.565	91.722	1.666	0.555	-1.029	0.014	0.005
R2	2017-03-21 17:09 PDT	CO2 clumped	OK	FALSE	16NQ22		Chewbacca	16NQ22	Calcite	2017-03-03 00:00:00 PST	90	9	9	-2.48	0	0	-1.87	0.01	0	28.93	0.01	0	1.166	0.001	0	9.432	0.006	0.002	10.169	0.047	0.016	-0.315	0.045	0.015	18.322	0.233	0.078	-0.619	0.231	0.077	120.38	2.2	0.733	98.535	2.156	0.719	-1.085	0.018	0.006
R3	2017-03-22 04:08 PDT	CO2 clumped	OK	FALSE	16NQ22		Chewbacca	16NQ22	Calcite	2017-03-03 00:00:00 PST	90	9	9	-2.59	0	0	-2.01	0	0	28.79	0	0	1.062	0.002	0.001	9.294	0.004	0.001	9.928	0.024	0.008	-0.312	0.025	0.008	18.204	0.179	0.06	-0.462	0.175	0.058	114.306	6.869	2.29	92.994	6.743	2.248	-1.1	0.013	0.004
R4	2017-03-23 01:06 PDT	CO2 clumped	OK	FALSE	16NQ22		Chewbacca	16NQ22	Calcite	2017-03-03 00:00:00 PST	90	9	9	-2.55	0	0	-1.92	0	0	28.88	0	0	1.1	0.002	0.001	9.378	0.005	0.002	10.039	0.043	0.014	-0.323	0.039	0.013	18.273	0.117	0.039	-0.562	0.116	0.039	121.189	2.674	0.891	99.52	2.629	0.876	-1.07	0.02	0.007
S12	16NQ23	CO2 clumped	OK
R1	2016-11-12 22:04 PST	CO2 clumped	OK	FALSE	16NQ23		Chewbacca	16NQ23	Calcite	2016-09-07 00:00:00 PDT	90	9	9	-1.93	0	0	-1.41	0	0	29.41	0	0	1.723	0.002	0.001	4.239	0.004	0.001	5.67	0.042	0.014	-0.282	0.041	0.014	8.875	0.199	0.066	0.375	0.201	0.067	-1.729	2.501	0.834	-11.808	2.477	0.826	0.015	0.022	0.007
R2	2016-11-15 02:41 PST	CO2 clumped	OK	FALSE	16NQ23		Chewbacca	16NQ23	Calcite	2016-09-07 00:00:00 PDT	90	9	9	-1.93	0	0	-1.79	0	0	29.02	0	0	1.71	0.002	0.001	3.859	0.004	0.001	5.258	0.04	0.013	-0.306	0.04	0.013	8.026	0.149	0.05	0.291	0.149	0.05	-2.176	1.756	0.585	-11.502	1.743	0.581	0.019	0.015	0.005
R3	2016-11-16 21:09 PST	CO2 clumped	OK	FALSE	16NQ23		Chewbacca	16NQ23	Calcite	2016-09-07 00:00:00 PDT	90	9	9	-1.81	0	0	-1.89	0	0	28.91	0	0	1.815	0.004	0.001	3.757	0.004	0.001	5.254	0.035	0.012	-0.317	0.034	0.011	7.901	0.181	0.06	0.37	0.179	0.06	-2.836	1.978	0.659	-12.067	1.962	0.654	0.025	0.017	0.006
R4	2017-03-25 22:43 PDT	CO2 clumped	OK	FALSE	16NQ23		Chewbacca	16NQ23	Calcite	2017-03-03 00:00:00 PST	90	9	9	-1.55	0	0	-1.59	0.01	0	29.22	0.01	0	2.047	0.003	0.001	9.713	0.005	0.002	11.372	0.036	0.012	-0.306	0.037	0.012	19.043	0.172	0.057	-0.468	0.166	0.055	117.467	1.37	0.457	94.054	1.339	0.446	-1.073	0.012	0.004
S13	16NQ25	CO2 clumped	OK
R1	2017-03-19 21:41 PDT	CO2 clumped	OK	FALSE	16NQ25		Chewbacca	16NQ25	Calcite	2017-03-03 00:00:00 PST	90	9	9	-5.75	0	0	-3.8	0.01	0	26.94	0.01	0	-1.965	0.002	0.001	7.471	0.006	0.002	5.054	0.033	0.011	-0.248	0.037	0.012	14.254	0.227	0.076	-0.732	0.231	0.077	112.348	1.334	0.445	98.496	1.314	0.438	-1.021	0.013	0.004
R2	2017-03-21 19:20 PDT	CO2 clumped	OK	FALSE	16NQ25		Chewbacca	16NQ25	Calcite	2017-03-03 00:00:00 PST	90	9	9	-5.66	0	0	-3.76	0.03	0.01	26.99	0.04	0.01	-1.884	0.003	0.001	7.52	0.034	0.011	5.136	0.034	0.011	-0.298	0.027	0.009	14.327	0.134	0.045	-0.758	0.122	0.041	126.958	6.439	2.146	112.721	6.29	2.097	-1.061	0.026	0.009
R3	2017-03-22 16:24 PDT	CO2 clumped	OK	FALSE	16NQ25		Chewbacca	16NQ25	Calcite	2017-03-03 00:00:00 PST	90	9	9	-5.67	0	0	-3.72	0.04	0.01	27.02	0.04	0.01	-1.886	0.003	0.001	7.555	0.041	0.014	5.165	0.053	0.018	-0.301	0.045	0.015	14.601	0.286	0.095	-0.557	0.216	0.072	112.55	2.371	0.79	98.423	2.282	0.761	-1.009	0.017	0.006
R4	2017-03-24 16:44 PDT	CO2 clumped	OK	FALSE	16NQ25		Chewbacca	16NQ25	Calcite	2017-03-03 00:00:00 PST	90	9	9	-5.64	0	0	-3.77	0.05	0.02	26.98	0.05	0.02	-1.861	0.002	0.001	7.509	0.053	0.018	5.128	0.045	0.015	-0.319	0.044	0.015	14.696	0.346	0.115	-0.373	0.262	0.087	117.122	2.58	0.86	103.005	2.592	0.864	-1.076	0.024	0.008
R5	2017-06-13 02:51 PDT	CO2 clumped	OK	FALSE	16NQ25		Chewbacca	16NQ25	Calcite	2017-03-03 00:00:00 PST	90	9	9	-5.84	0	0	-3.83	0.01	0	26.92	0.01	0	-2.047	0.003	0.001	7.449	0.007	0.002	4.884	0.037	0.012	-0.31	0.039	0.013	14.291	0.166	0.055	-0.653	0.167	0.056	138.96	2.358	0.786	124.923	2.338	0.779	-1.131	0.016	0.005
S14	16NQ26	CO2 clumped	OK
R1	2016-11-17 01:34 PST	CO2 clumped	OK	FALSE	16NQ26		Chewbacca	16NQ26	Calcite	2016-09-07 00:00:00 PDT	90	9	9	-6.61	0	0	-0.82	0.01	0	30.02	0.01	0	-2.65	0.002	0.001	4.825	0.008	0.003	1.698	0.041	0.014	-0.298	0.044	0.015	10.216	0.18	0.06	0.537	0.174	0.058	-1.596	1.522	0.507	-8.195	1.509	0.503	0.014	0.013	0.004
R2	2016-11-17 22:26 PST	CO2 clumped	OK	FALSE	16NQ26		Chewbacca	16NQ26	Calcite	2016-09-07 00:00:00 PDT	90	9	9	-6.74	0	0	-0.76	0.01	0	30.08	0.01	0	-2.766	0.004	0.001	4.882	0.006	0.002	1.62	0.039	0.013	-0.311	0.039	0.013	10.277	0.168	0.056	0.485	0.164	0.055	-2.072	1.56	0.52	-8.653	1.554	0.518	0.018	0.014	0.005
R3	2016-11-18 05:23 PST	CO2 clumped	OK	FALSE	16NQ26		Chewbacca	16NQ26	Calcite	2016-09-07 00:00:00 PDT	90	9	9	-6.71	0	0	-0.83	0.01	0	30	0.01	0	-2.74	0.002	0.001	4.809	0.005	0.002	1.606	0.025	0.008	-0.281	0.026	0.009	10.158	0.166	0.055	0.511	0.166	0.055	-1.422	0.779	0.26	-7.895	0.778	0.259	0.012	0.007	0.002
R4	2017-06-14 18:00 PDT	CO2 clumped	OK	FALSE	16NQ26		Chewbacca	16NQ26	Calcite	2017-03-03 00:00:00 PST	90	9	9	-6.68	0	0	-0.78	0.01	0	30.05	0.01	0	-2.731	0.002	0.001	10.52	0.006	0.002	7.259	0.06	0.02	-0.236	0.056	0.019	20.563	0.246	0.082	-0.576	0.24	0.08	139.099	2.505	0.835	119.169	2.471	0.824	-1.168	0.017	0.006
R5	2017-06-15 02:33 PDT	CO2 clumped	OK	FALSE	16NQ26		Chewbacca	16NQ26	Calcite	2017-03-03 00:00:00 PST	90	9	9	-6.72	0	0	-0.8	0.01	0	30.03	0.01	0	-2.771	0.002	0.001	10.501	0.006	0.002	7.148	0.031	0.01	-0.286	0.031	0.01	20.542	0.223	0.074	-0.558	0.222	0.074	140.486	2.245	0.748	120.622	2.209	0.736	-1.18	0.018	0.006
S15	16NQ34	CO2 clumped	OK
R1	2017-03-20 00:05 PDT	CO2 clumped	OK	FALSE	16NQ34		Chewbacca	16NQ34	Calcite	2017-03-03 00:00:00 PST	90	9	9	-0.68	0	0	-4.37	0.03	0.01	26.36	0.03	0.01	2.771	0.004	0.001	6.911	0.027	0.009	9.401	0.047	0.016	-0.269	0.052	0.017	13.227	0.334	0.111	-0.634	0.286	0.095	108.639	1.866	0.622	90.515	1.865	0.622	-0.982	0.017	0.006
R2	2017-03-21 23:41 PDT	CO2 clumped	OK	FALSE	16NQ34		Chewbacca	16NQ34	Calcite	2017-03-03 00:00:00 PST	90	9	9	-0.72	0	0	-4.45	0.02	0.01	26.27	0.02	0.01	2.73	0.002	0.001	6.828	0.024	0.008	9.323	0.038	0.013	-0.222	0.041	0.014	13.042	0.178	0.059	-0.651	0.155	0.052	123.013	3.205	1.068	104.882	3.113	1.038	-1.048	0.016	0.005
R3	2017-03-22 18:34 PDT	CO2 clumped	OK	FALSE	16NQ34		Chewbacca	16NQ34	Calcite	2017-03-03 00:00:00 PST	90	9	9	-0.66	0	0	-4.33	0.02	0.01	26.4	0.02	0.01	2.788	0.003	0.001	6.955	0.017	0.006	9.459	0.042	0.014	-0.272	0.034	0.011	13.52	0.195	0.065	-0.432	0.177	0.059	112.165	6.518	2.173	93.87	6.384	2.128	-0.954	0.025	0.008
R4	2017-03-24 18:56 PDT	CO2 clumped	OK	FALSE	16NQ34		Chewbacca	16NQ34	Calcite	2017-03-03 00:00:00 PST	90	9	9	-0.66	0	0	-4.19	0.01	0	26.54	0.01	0	2.796	0.004	0.001	7.095	0.013	0.004	9.599	0.052	0.017	-0.279	0.05	0.017	13.669	0.133	0.044	-0.564	0.135	0.045	123.983	6.552	2.184	105.182	6.424	2.141	-1.058	0.026	0.009
S16	16NQ35	CO2 clumped	OK
R1	2017-03-20 02:30 PDT	CO2 clumped	OK	FALSE	16NQ35		Chewbacca	16NQ35	Calcite	2017-03-03 00:00:00 PST	90	9	9	-2.69	0.01	0	3.67	0.02	0.01	34.64	0.02	0.01	1.163	0.011	0.004	15.025	0.021	0.007	15.737	0.044	0.015	-0.247	0.023	0.008	29.273	0.679	0.226	-0.973	0.619	0.206	124.402	4.388	1.463	90.578	4.302	1.434	-1.106	0.034	0.011
R2	2017-03-22 01:59 PDT	CO2 clumped	OK	FALSE	16NQ35		Chewbacca	16NQ35	Calcite	2017-03-03 00:00:00 PST	90	9	9	-2.68	0	0	3.69	0.01	0	34.66	0.01	0	1.177	0.003	0.001	15.045	0.006	0.002	15.774	0.021	0.007	-0.244	0.022	0.007	30.312	0.189	0.063	-0.005	0.184	0.061	131.767	2.715	0.905	97.661	2.634	0.878	-1.128	0.021	0.007
R3	2017-03-22 22:59 PDT	CO2 clumped	OK	FALSE	16NQ35		Chewbacca	16NQ35	Calcite	2017-03-03 00:00:00 PST	90	9	9	-2.68	0	0	3.8	0.01	0	34.77	0.01	0	1.182	0.003	0.001	15.157	0.006	0.002	15.91	0.027	0.009	-0.224	0.026	0.009	30.597	0.151	0.05	0.051	0.143	0.048	125.612	2.801	0.934	91.448	2.718	0.906	-1.071	0.016	0.005
R4	2017-03-24 23:22 PDT	CO2 clumped	OK	FALSE	16NQ35		Chewbacca	16NQ35	Calcite	2017-03-03 00:00:00 PST	90	9	9	-2.63	0	0	3.83	0	0	34.81	0	0	1.227	0.003	0.001	15.194	0.004	0.001	15.972	0.034	0.011	-0.245	0.03	0.01	30.757	0.194	0.065	0.135	0.191	0.064	126.358	4.244	1.415	92.042	4.117	1.372	-1.1	0.027	0.009
S17	16NQ36	CO2 clumped	OK
R1	2016-11-07 02:33 PST	CO2 clumped	OK	FALSE	16NQ36		Chewbacca	16NQ36	Calcite	2016-09-07 00:00:00 PDT	90	9	9	-0.53	0	0	-1.51	0.01	0	29.3	0.01	0	3.035	0.003	0.001	4.14	0.006	0.002	6.932	0.031	0.01	-0.279	0.031	0.01	8.598	0.142	0.047	0.299	0.141	0.047	-2.11	2.149	0.716	-13.369	2.132	0.711	0.018	0.018	0.006
R2	2016-11-08 17:42 PST	CO2 clumped	OK	FALSE	16NQ36		Chewbacca	16NQ36	Calcite	2016-09-07 00:00:00 PDT	90	9	9	-0.53	0	0	-1.76	0.01	0	29.04	0.01	0	3.026	0.002	0.001	3.887	0.006	0.002	6.661	0.038	0.013	-0.293	0.038	0.013	7.999	0.174	0.058	0.207	0.176	0.059	-3.245	2.027	0.676	-13.995	2.012	0.671	0.027	0.017	0.006
R3	2016-11-11 16:54 PST	CO2 clumped	OK	FALSE	16NQ36		Chewbacca	16NQ36	Calcite	2016-09-07 00:00:00 PDT	90	9	9	-0.55	0	0	-1.57	0.01	0	29.24	0.01	0	3.007	0.002	0.001	4.079	0.005	0.002	6.863	0.072	0.024	-0.261	0.073	0.024	8.689	0.191	0.064	0.51	0.191	0.064	-3.32	1.953	0.651	-14.42	1.93	0.643	0.028	0.017	0.006
R4	2017-06-13 16:36 PDT	CO2 clumped	OK	FALSE	16NQ36		Chewbacca	16NQ36	Calcite	2017-03-03 00:00:00 PST	90	9	9	-0.52	0	0	-1.52	0	0	29.3	0	0	3.023	0.002	0.001	9.795	0.002	0.001	12.516	0.032	0.011	-0.259	0.033	0.011	19.022	0.145	0.048	-0.652	0.142	0.047	143.932	2.955	0.985	118.624	2.891	0.964	-1.19	0.02	0.007
S18	16NQ37	CO2 clumped	OK
R1	2016-11-10 23:04 PST	CO2 clumped	OK	FALSE	16NQ37		Chewbacca	16NQ37	Calcite	2016-09-07 00:00:00 PDT	90	9	9	-2.21	0	0	-2.51	0.01	0	28.28	0.01	0	1.418	0.002	0.001	3.137	0.006	0.002	4.27	0.024	0.008	-0.281	0.021	0.007	6.151	0.168	0.056	-0.132	0.171	0.057	0.394	2.1	0.7	-7.245	2.081	0.694	-0.003	0.017	0.006
R2	2016-11-14 04:39 PST	CO2 clumped	OK	FALSE	16NQ37		Chewbacca	16NQ37	Calcite	2016-09-07 00:00:00 PDT	90	9	9	-2.17	0	0	-2.55	0.01	0	28.23	0.01	0	1.459	0.004	0.001	3.096	0.009	0.003	4.281	0.048	0.016	-0.271	0.043	0.014	6.547	0.085	0.028	0.344	0.078	0.026	-2.225	2.242	0.747	-9.806	2.236	0.745	0.019	0.02	0.007
R3	2016-11-15 19:54 PST	CO2 clumped	OK	FALSE	16NQ37		Chewbacca	16NQ37	Calcite	2016-09-07 00:00:00 PDT	90	9	8	-1.95	0	0	-2.08	0.01	0	28.71	0.01	0	1.682	0.003	0.001	3.563	0.006	0.002	4.919	0.047	0.017	-0.323	0.045	0.016	7.412	0.173	0.061	0.272	0.168	0.059	-1.11	1.593	0.563	-9.841	1.576	0.557	0.01	0.014	0.005
R4	2017-06-15 00:24 PDT	CO2 clumped	OK	FALSE	16NQ37		Chewbacca	16NQ37	Calcite	2017-03-03 00:00:00 PST	90	9	9	-2.14	0	0	-2.46	0.01	0	28.33	0.01	0	1.47	0.003	0.001	8.84	0.006	0.002	9.94	0.052	0.017	-0.277	0.051	0.017	16.964	0.14	0.047	-0.78	0.144	0.048	138.519	0.977	0.326	117.247	0.953	0.318	-1.17	0.008	0.003
[truncated: 59 more columns]

## Sheet: Standards
	ID	Analysis	Analysis Status	Disabled	Identifier_1	Run	Mass Spec	Easotope Name	Sample Type	Corr Interval	Acid Temp	Acquisitions	Enabled Acquisitions	d13C VPDB (Raw)	d13C VPDB (Raw) SD	d13C VPDB (Raw) SE	d18O VPDB (Raw)	d18O VPDB (Raw) SD	d18O VPDB (Raw) SE	d18O VSMOW (Raw)	d18O VSMOW (Raw) SD	d18O VSMOW (Raw) SE	d45 WG (Raw)	d45 WG (Raw) SD	d45 WG (Raw) SE	d46 WG (Raw)	d46 WG (Raw) SD	d46 WG (Raw) SE	d47 WG (Raw)	d47 WG (Raw) SD	d47 WG (Raw) SE	D47 WG (Raw)	D47 WG (Raw) SD	D47 WG (Raw) SE	d48 WG (Raw)	d48 WG (Raw) SD	d48 WG (Raw) SE	D48 WG (Raw)	D48 WG (Raw) SD	D48 WG (Raw) SE	d49 WG (Raw)	d49 WG (Raw) SD	d49 WG (Raw) SE	D49 WG (Raw)	D49 WG (Raw) SD	D49 WG (Raw) SE	49 Param	49 Param SD	49 Param SE
R1	2016-09-07 14:20 PDT	CO2 clumped	OK	FALSE	Bonedry DI UH Mh 8/11/16		Chewbacca	Unheated gas	CO2	2016-09-07 00:00:00 PDT		9	9	-37.47	0	0	-0.57	0	0	30.27	0	0	-31.587	0.004	0.001	5.004	0.003	0.001	-27.913	0.024	0.008	-0.084	0.026	0.009	10.659	0.156	0.052	0.62	0.153	0.051	0.239	1.827	0.609	24.986	1.869	0.623	-0.002	0.013	0.004
R2	2016-09-07 16:25 PDT	CO2 clumped	OK	FALSE	ETH-4		Chewbacca	ETH-4-1	Calcite	2016-09-07 00:00:00 PDT	90	9	9	-10.16	0	0	-10.81	0.01	0	19.71	0.01	0	-6.322	0.001	0	-5.227	0.006	0.002	-12.055	0.046	0.015	-0.433	0.051	0.017	-11.078	0.159	0.053	-0.659	0.16	0.053	3.393	2.016	0.672	20.654	2.053	0.684	-0.025	0.015	0.005
R3	2016-09-08 01:16 PDT	CO2 clumped	OK	FALSE	Carmel Chalk		Chewbacca	Carmel Chalk	Calcite	2016-09-07 00:00:00 PDT	90	9	9	-2.11	0	0	3.94	0	0	34.92	0	0	1.735	0.001	0	9.617	0.005	0.002	11.025	0.045	0.015	-0.233	0.044	0.015	20.206	0.24	0.08	0.863	0.235	0.078	-3.88	1.74	0.58	-24.244	1.71	0.57	0.028	0.013	0.004
R4	2016-09-08 13:32 PDT	CO2 clumped	OK	FALSE	ETH-1		Chewbacca	ETH-1-1	Calcite	2016-09-07 00:00:00 PDT	90	9	9	1.98	0	0	5.69	0.01	0	36.72	0.01	0	5.633	0.003	0.001	11.377	0.005	0.002	16.537	0.038	0.013	-0.516	0.038	0.013	23.902	0.149	0.05	0.996	0.145	0.048	-10.289	2.864	0.955	-37.825	2.787	0.929	0.075	0.021	0.007
R5	2016-09-08 22:15 PDT	CO2 clumped	OK	FALSE	ETH-2		Chewbacca	ETH-2-1	Calcite	2016-09-07 00:00:00 PDT	90	9	9	-10.11	0	0	-10.83	0.01	0	19.69	0.01	0	-6.276	0.004	0.001	-5.246	0.008	0.003	-12.243	0.054	0.018	-0.651	0.049	0.016	-11.168	0.288	0.096	-0.711	0.285	0.095	4.028	2.329	0.776	21.29	2.371	0.79	-0.03	0.017	0.006
R6	2016-09-09 13:10 PDT	CO2 clumped	OK	FALSE	Bonedry DI UH WD 8/10/16		Chewbacca	Unheated gas	CO2	2016-09-07 00:00:00 PDT		9	9	-37.85	0.01	0	-1.35	0	0	29.47	0	0	-31.969	0.005	0.002	4.228	0.003	0.001	-29.047	0.03	0.01	-0.085	0.03	0.01	9.264	0.198	0.066	0.783	0.194	0.065	-14.928	2.689	0.896	11.403	2.757	0.919	0.108	0.02	0.007
R7	2016-09-09 15:16 PDT	CO2 clumped	OK	FALSE	ETH-3		Chewbacca	ETH-3-1	Calcite	2016-09-07 00:00:00 PDT	90	9	9	1.65	0	0	6.08	0.01	0	37.13	0.01	0	5.337	0.003	0.001	11.771	0.006	0.002	16.944	0.044	0.015	-0.195	0.05	0.017	24.758	0.198	0.066	1.052	0.188	0.063	-10.795	2.602	0.867	-38.752	2.535	0.845	0.078	0.019	0.006
R8	2016-09-10 02:09 PDT	CO2 clumped	OK	FALSE	ETH-4		Chewbacca	ETH-4-1	Calcite	2016-09-07 00:00:00 PDT	90	9	9	-10.13	0	0	-10.96	0	0	19.56	0	0	-6.305	0.003	0.001	-5.375	0.003	0.001	-12.193	0.048	0.016	-0.444	0.046	0.015	-11.427	0.261	0.087	-0.715	0.26	0.087	5.64	2.178	0.726	23.221	2.22	0.74	-0.04	0.015	0.005
R9	2016-09-10 11:54 PDT	CO2 clumped	OK	FALSE	TV03		Chewbacca	TV03	Calcite	2016-09-07 00:00:00 PDT	90	9	9	2.53	0	0	-0.55	0.01	0	30.3	0.01	0	5.934	0.004	0.001	5.116	0.005	0.002	10.976	0.03	0.01	-0.205	0.029	0.01	10.776	0.161	0.054	0.512	0.155	0.052	-5.647	2.08	0.693	-21.756	2.05	0.683	0.041	0.015	0.005
R10	2016-09-10 22:46 PDT	CO2 clumped	OK	FALSE	Veinstrom		Chewbacca	Veinstrom	Calcite	2016-09-07 00:00:00 PDT	90	9	9	-6.1	0	0	-4.81	0.01	0	25.9	0.01	0	-2.305	0.002	0.001	0.815	0.008	0.003	-1.827	0.033	0.011	-0.249	0.039	0.013	1.577	0.151	0.05	-0.054	0.163	0.054	-0.038	3.389	1.13	0.821	3.397	1.132	0	0.025	0.008
R11	2016-09-11 22:45 PDT	CO2 clumped	OK	FALSE	ETH-2		Chewbacca	ETH-2-1	Calcite	2016-09-07 00:00:00 PDT	90	9	9	-10.11	0	0	-10.87	0.01	0	19.65	0.01	0	-6.278	0.003	0.001	-5.282	0.008	0.003	-12.263	0.056	0.019	-0.634	0.055	0.018	-11.201	0.19	0.063	-0.671	0.186	0.062	3.516	2.214	0.738	20.843	2.24	0.747	-0.026	0.016	0.005
R12	2016-09-12 12:50 PDT	CO2 clumped	OK	FALSE	Bonedry DI UH WD 8/10/16		Chewbacca	Unheated gas	CO2	2016-09-07 00:00:00 PDT		9	9	-37.5	0	0	-0.99	0	0	29.84	0	0	-31.629	0.004	0.001	4.587	0.004	0.001	-28.368	0.032	0.011	-0.1	0.033	0.011	9.777	0.194	0.065	0.576	0.19	0.063	5.151	2.087	0.696	30.906	2.142	0.714	-0.038	0.015	0.005
R13	2016-09-12 14:55 PDT	CO2 clumped	OK	FALSE	ETH-1		Chewbacca	ETH-1-1	Calcite	2016-09-07 00:00:00 PDT	90	9	9	2.03	0	0	5.69	0	0	36.72	0	0	5.683	0.003	0.001	11.38	0.003	0.001	16.568	0.027	0.009	-0.54	0.027	0.009	23.899	0.163	0.054	0.986	0.161	0.054	-6.754	1.384	0.461	-34.447	1.345	0.448	0.049	0.01	0.003
R14	2016-09-13 01:18 PDT	CO2 clumped	OK	FALSE	Carmel Chalk		Chewbacca	Carmel Chalk	Calcite	2016-09-07 00:00:00 PDT	90	9	9	-2.15	0	0	3.9	0	0	34.88	0	0	1.696	0.004	0.001	9.574	0.004	0.001	10.93	0.06	0.02	-0.245	0.06	0.02	20.232	0.177	0.059	0.974	0.169	0.056	-2.521	2.164	0.721	-22.789	2.121	0.707	0.019	0.016	0.005
R15	2016-09-13 14:03 PDT	CO2 clumped	OK	FALSE	Evap DI + CM UH DU 8/24/16		Chewbacca	Unheated gas	CO2	2016-09-07 00:00:00 PDT		9	9	2.39	0	0	10.54	0.01	0	41.72	0.01	0	6.183	0.003	0.001	16.25	0.005	0.002	22.425	0.026	0.009	-0.03	0.024	0.008	34.618	0.151	0.05	1.795	0.152	0.051	-28.739	2.88	0.96	-65.183	2.773	0.924	0.207	0.021	0.007
R16	2016-09-13 16:13 PDT	CO2 clumped	OK	FALSE	Carrera Marble		Chewbacca	Carrara Marble	Calcite	2016-09-07 00:00:00 PDT	90	9	9	2.24	0	0	6.01	0	0	37.06	0.01	0	5.892	0.003	0.001	11.705	0.005	0.002	17.198	0.031	0.01	-0.449	0.028	0.009	24.533	0.151	0.05	0.963	0.146	0.049	-6.16	2.55	0.85	-34.691	2.472	0.824	0.045	0.019	0.006
R17	2016-09-14 00:58 PDT	CO2 clumped	OK	FALSE	VeinStrom		Chewbacca	Veinstrom	Calcite	2016-09-07 00:00:00 PDT	90	9	9	-6.19	0	0	-4.82	0.01	0	25.89	0.01	0	-2.389	0.003	0.001	0.808	0.008	0.003	-1.934	0.053	0.018	-0.263	0.05	0.017	1.57	0.18	0.06	-0.046	0.177	0.059	-0.146	2.019	0.673	0.815	2.022	0.674	0.001	0.015	0.005
R18	2016-09-16 14:18 PDT	CO2 clumped	OK	FALSE	Carrera Marble		Chewbacca	Carrara Marble	Calcite	2016-09-07 00:00:00 PDT	90	9	9	2.04	0	0	6.4	0.01	0	37.46	0.01	0	5.717	0.002	0.001	12.095	0.007	0.002	17.399	0.039	0.013	-0.452	0.039	0.013	25.399	0.192	0.064	1.037	0.18	0.06	-5.797	2.771	0.924	-34.892	2.688	0.896	0.044	0.021	0.007
R19	2016-09-17 01:18 PDT	CO2 clumped	OK	FALSE	ETH-3		Chewbacca	ETH-3-1	Calcite	2016-09-07 00:00:00 PDT	90	9	9	1.65	0	0	5.98	0.01	0	37.02	0.01	0	5.334	0.003	0.001	11.669	0.006	0.002	16.822	0.027	0.009	-0.213	0.027	0.009	24.525	0.245	0.082	1.026	0.235	0.078	-6.625	1.772	0.591	-34.506	1.727	0.576	0.051	0.014	0.005
R20	2016-09-18 13:25 PDT	CO2 clumped	OK	FALSE	Bonedry DI UH MG 8-29		Chewbacca	Unheated gas	CO2	2016-09-07 00:00:00 PDT		9	9	-37.48	0	0	-0.98	0	0	29.85	0	0	-31.611	0.003	0.001	4.592	0.005	0.002	-28.361	0.039	0.013	-0.117	0.038	0.013	9.567	0.179	0.06	0.359	0.174	0.058	7.408	1.548	0.516	33.191	1.59	0.53	-0.054	0.012	0.004
R21	2016-09-18 15:28 PDT	CO2 clumped	OK	FALSE	ETH-3		Chewbacca	ETH-3-1	Calcite	2016-09-07 00:00:00 PDT	90	9	9	1.66	0	0	6.09	0.01	0	37.14	0.01	0	5.345	0.003	0.001	11.782	0.006	0.002	16.941	0.048	0.016	-0.216	0.045	0.015	24.784	0.23	0.077	1.056	0.227	0.076	-5.903	3.751	1.25	-34.027	3.643	1.214	0.041	0.026	0.009
R22	2016-09-19 13:18 PDT	CO2 clumped	OK	FALSE	ETH-1		Chewbacca	ETH-1-1	Calcite	2016-09-07 00:00:00 PDT	90	9	9	1.96	0	0	5.59	0.01	0	36.62	0.01	0	5.614	0.002	0.001	11.283	0.007	0.002	16.384	0.029	0.01	-0.555	0.03	0.01	23.734	0.119	0.04	1.018	0.113	0.038	-6.608	1.768	0.589	-34.051	1.716	0.572	0.045	0.012	0.004
R23	2016-09-21 01:48 PDT	CO2 clumped	OK	FALSE	Carmel Chalk		Chewbacca	Carmel Chalk	Calcite	2016-09-07 00:00:00 PDT	90	9	9	-2.11	0	0	3.78	0	0	34.75	0	0	1.732	0.002	0.001	9.45	0.004	0.001	10.832	0.046	0.015	-0.26	0.042	0.014	19.894	0.321	0.107	0.887	0.31	0.103	-4.652	1.698	0.566	-24.681	1.664	0.555	0.035	0.013	0.004
R24	2016-09-22 15:47 PDT	CO2 clumped	OK	FALSE	BondryDI H MG 8-29		Chewbacca	Heated Gas	CO2	2016-09-07 00:00:00 PDT		9	9	-37.55	0.01	0	-2.84	0.01	0	27.93	0.01	0	-31.739	0.005	0.002	2.728	0.005	0.002	-31.006	0.031	0.01	-0.881	0.029	0.01	6.213	0.41	0.137	0.745	0.414	0.138	7.215	2.992	0.997	36.913	3.076	1.025	-0.054	0.022	0.007
R25	2016-09-23 16:44 PDT	CO2 clumped	OK	FALSE	ETH-3		Chewbacca	ETH-3-1	Calcite	2016-09-07 00:00:00 PDT	90	9	9	1.6	0	0	5.95	0.01	0	37	0.01	0	5.286	0.003	0.001	11.646	0.006	0.002	16.759	0.033	0.011	-0.203	0.03	0.01	24.489	0.12	0.04	1.037	0.116	0.039	-6.86	1.442	0.481	-34.641	1.404	0.468	0.053	0.011	0.004
R26	2016-09-25 12:04 PDT	CO2 clumped	OK	FALSE	EVAP DI+CM H		Chewbacca	Heated Gas	CO2	2016-09-07 00:00:00 PDT		9	9	0.51	0	0	20.82	0.01	0	52.32	0.01	0	4.779	0.002	0.001	26.581	0.006	0.002	30.537	0.037	0.012	-0.629	0.033	0.011	56.392	0.212	0.071	2.395	0.201	0.067	-11.675	1.629	0.543	-66.088	1.536	0.512	0.089	0.012	0.004
R27	2016-09-26 14:10 PDT	CO2 clumped	OK	FALSE	ETH-4		Chewbacca	ETH-4-1	Calcite	2016-09-07 00:00:00 PDT	90	9	9	-10.18	0	0	-10.95	0.01	0	19.58	0.01	0	-6.345	0.003	0.001	-5.358	0.014	0.005	-12.2	0.05	0.017	-0.427	0.056	0.019	-11.394	0.169	0.056	-0.715	0.191	0.064	3.86	1.506	0.502	21.419	1.53	0.51	-0.03	0.012	0.004
R28	2016-10-03 14:34 PDT	CO2 clumped	OK	FALSE	ETH-4		Chewbacca	ETH-3-1	Calcite	2016-09-07 00:00:00 PDT	90	9	9	1.64	0	0	6.04	0.01	0	37.09	0.01	0	5.331	0.003	0.001	11.733	0.005	0.002	16.899	0.042	0.014	-0.195	0.042	0.014	24.941	0.155	0.052	1.307	0.153	0.051	-6.855	2.02	0.673	-34.844	1.961	0.654	0.055	0.016	0.005
R29	2016-10-04 01:40 PDT	CO2 clumped	OK	FALSE	M24-12		Chewbacca	Carmel Chalk	Calcite	2016-09-07 00:00:00 PDT	90	9	9	-2.19	0	0	3.83	0	0	34.81	0	0	1.661	0.002	0.001	9.504	0.004	0.001	10.823	0.031	0.01	-0.248	0.033	0.011	20.009	0.239	0.08	0.893	0.233	0.078	-4.777	2.382	0.794	-24.832	2.339	0.78	0.038	0.019	0.006
R30	2016-10-05 22:38 PDT	CO2 clumped	OK	FALSE	Carmel Chalk		Chewbacca	Carmel Chalk	Calcite	2016-09-07 00:00:00 PDT	90	9	9	-2.27	0	0	3.8	0.01	0	34.78	0.01	0	1.583	0.003	0.001	9.473	0.005	0.002	10.683	0.027	0.009	-0.275	0.028	0.009	19.927	0.211	0.07	0.875	0.202	0.067	-3.506	1.911	0.637	-23.445	1.876	0.625	0.028	0.015	0.005
R31	2016-10-06 16:46 PDT	CO2 clumped	OK	FALSE	253 Standards		Chewbacca	Carrara Marble	Calcite	2016-09-07 00:00:00 PDT	90	9	9	2.03	0	0	6.36	0	0	37.42	0	0	5.708	0.004	0.001	12.058	0.005	0.002	17.354	0.036	0.012	-0.451	0.039	0.013	25.465	0.15	0.05	1.175	0.15	0.05	-6.765	1.694	0.565	-35.753	1.648	0.549	0.054	0.014	0.005
R32	2016-10-07 12:44 PDT	CO2 clumped	OK	FALSE	Evap DI+CM H 9-19-16		Chewbacca	Heated Gas	CO2	2016-09-07 00:00:00 PDT		9	9	1.1	0	0	18.02	0	0	49.44	0	0	5.237	0.003	0.001	23.77	0.004	0.001	28.239	0.048	0.016	-0.637	0.045	0.015	50.5	0.162	0.054	2.286	0.156	0.052	-12.381	2.708	0.903	-62.17	2.573	0.858	0.099	0.022	0.007
R33	2016-10-07 14:55 PDT	CO2 clumped	OK	FALSE	Carerra Marble		Chewbacca	Carrara Marble	Calcite	2016-09-07 00:00:00 PDT	90	9	9	2.05	0	0	6.4	0	0	37.46	0	0	5.725	0.004	0.001	12.098	0.004	0.001	17.403	0.071	0.024	-0.459	0.069	0.023	25.624	0.152	0.051	1.252	0.149	0.05	-5.282	1.46	0.487	-34.405	1.415	0.472	0.042	0.012	0.004
R34	2016-10-08 14:29 PDT	CO2 clumped	OK	FALSE	Vein Strom UCLA-1		Chewbacca	Veinstrom	Calcite	2016-09-07 00:00:00 PDT	90	9	9	-6.13	0.01	0	-4.69	0.01	0	26.02	0.01	0	-2.331	0.006	0.002	0.931	0.007	0.002	-1.765	0.027	0.009	-0.274	0.023	0.008	2.814	0.288	0.096	0.948	0.288	0.096	-0.7	1.914	0.638	-0.043	1.926	0.642	0.005	0.015	0.005
R35	2016-10-09 01:33 PDT	CO2 clumped	OK	FALSE	TVO3		Chewbacca	TV03	Calcite	2016-09-07 00:00:00 PDT	90	9	9	2.54	0	0	-0.49	0.01	0	30.36	0.01	0	5.945	0.003	0.001	5.174	0.007	0.002	11.013	0.049	0.016	-0.236	0.049	0.016	10.895	0.175	0.058	0.514	0.172	0.057	-3.927	2.282	0.761	-20.186	2.246	0.749	0.03	0.018	0.006
R36	2016-10-11 03:57 PDT	CO2 clumped	OK	FALSE	H2-03		Chewbacca	TV03	Calcite	2016-09-07 00:00:00 PDT	90	9	9	2.51	0	0	-0.43	0.01	0	30.41	0.01	0	5.92	0.003	0.001	5.229	0.007	0.002	11.042	0.053	0.018	-0.236	0.05	0.017	10.995	0.214	0.071	0.504	0.204	0.068	-2.916	1.278	0.426	-19.271	1.255	0.418	0.024	0.01	0.003
R37	2016-10-11 11:49 PDT	CO2 clumped	OK	FALSE	BonedryDI U CW 9-23		Chewbacca	Unheated gas	CO2	2016-09-07 00:00:00 PDT		9	9	-37.64	0	0	-0.98	0.01	0	29.85	0.01	0	-31.762	0.004	0.001	4.597	0.006	0.002	-28.51	0.04	0.013	-0.113	0.042	0.014	9.749	0.181	0.06	0.528	0.178	0.059	5.578	2.994	0.998	31.476	3.071	1.024	-0.042	0.022	0.007
R38	2016-10-11 13:59 PDT	CO2 clumped	OK	FALSE	TV03		Chewbacca	TV03	Calcite	2016-09-07 00:00:00 PDT	90	9	9	2.41	0	0	-0.55	0.01	0	30.3	0.01	0	5.823	0.002	0.001	5.117	0.013	0.004	10.879	0.043	0.014	-0.188	0.039	0.013	10.775	0.154	0.051	0.51	0.156	0.052	-5.592	2.604	0.868	-21.588	2.581	0.86	0.043	0.019	0.006
R39	2016-10-13 14:26 PDT	CO2 clumped	OK	FALSE	VeinStrom		Chewbacca	Veinstrom	Calcite	2016-09-07 00:00:00 PDT	90	9	9	-6.17	0	0	-4.9	0	0	25.81	0.01	0	-2.375	0.002	0.001	0.726	0.005	0.002	-1.985	0.054	0.018	-0.247	0.055	0.018	1.576	0.106	0.035	0.124	0.106	0.035	-1.239	1.701	0.567	-0.131	1.703	0.568	0.01	0.014	0.005
R40	2016-10-14 12:35 PDT	CO2 clumped	OK	FALSE	BonedryDI H CW 9-23		Chewbacca	Heated Gas	CO2	2016-09-07 00:00:00 PDT		9	9	-37.42	0.01	0	-6.22	0.01	0	24.45	0.01	0	-31.734	0.006	0.002	-0.669	0.007	0.002	-34.204	0.026	0.009	-0.859	0.03	0.01	-1.216	0.216	0.072	0.121	0.207	0.069	-7.713	2.14	0.713	28.37	2.216	0.739	0.063	0.018	0.006
R41	2016-10-14 14:45 PDT	CO2 clumped	OK	FALSE	ETH-2		Chewbacca	ETH-2-1	Calcite	2016-09-07 00:00:00 PDT	90	9	9	-10.22	0	0	-11.11	0.01	0	19.41	0.01	0	-6.395	0.005	0.002	-5.524	0.007	0.002	-12.661	0.04	0.013	-0.678	0.042	0.014	-11.767	0.167	0.056	-0.759	0.16	0.053	3.087	3.306	1.102	21.021	3.364	1.121	-0.025	0.027	0.009
R42	2016-10-14 23:21 PDT	CO2 clumped	OK	FALSE	ETH-4		Chewbacca	ETH-4-1	Calcite	2016-09-07 00:00:00 PDT	90	9	9	-10.17	0	0	-11.11	0.01	0	19.41	0.01	0	-6.344	0.003	0.001	-5.521	0.008	0.003	-12.41	0.025	0.008	-0.479	0.019	0.006	-11.686	0.202	0.067	-0.682	0.197	0.066	3.829	2.12	0.707	21.715	2.153	0.718	-0.031	0.017	0.006
R43	2016-10-15 23:22 PDT	CO2 clumped	OK	FALSE	Carmel Chalk		Chewbacca	Carmel Chalk	Calcite	2016-09-07 00:00:00 PDT	90	9	9	-2.24	0	0	3.51	0.01	0	34.48	0.01	0	1.599	0.002	0.001	9.185	0.006	0.002	10.442	0.034	0.011	-0.249	0.031	0.01	19.409	0.194	0.065	0.938	0.192	0.064	-4.537	1.266	0.422	-23.925	1.24	0.413	0.036	0.01	0.003
R44	2016-10-17 00:00 PDT	CO2 clumped	OK	FALSE	TV03		Chewbacca	TV03	Calcite	2016-09-07 00:00:00 PDT	90	9	9	2.5	0	0	-0.84	0.01	0	30	0.01	0	5.899	0.003	0.001	4.826	0.009	0.003	10.591	0.037	0.012	-0.266	0.035	0.012	10.107	0.283	0.094	0.428	0.274	0.091	-2.104	2.739	0.913	-17.676	2.708	0.903	0.016	0.021	0.007
R45	2016-10-19 12:09 PDT	CO2 clumped	OK	FALSE	BonedryDI H CW 9-23		Chewbacca	Heated Gas	CO2	2016-09-07 00:00:00 PDT		9	9	-37.95	0.01	0	-6.54	0	0	24.12	0	0	-32.244	0.006	0.002	-0.993	0.004	0.001	-35.089	0.024	0.008	-0.911	0.031	0.01	-2.416	0.162	0.054	-0.431	0.166	0.055	8.159	2.407	0.802	46.074	2.498	0.833	-0.066	0.02	0.007
R46	2016-10-19 14:17 PDT	CO2 clumped	OK	FALSE	ETH-2		Chewbacca	ETH-2-1	Calcite	2016-09-07 00:00:00 PDT	90	9	9	-10.23	0	0	-10.97	0.01	0	19.56	0.01	0	-6.392	0.003	0.001	-5.379	0.006	0.002	-12.506	0.068	0.023	-0.666	0.065	0.022	-11.461	0.178	0.059	-0.74	0.173	0.058	3.104	1.185	0.395	20.744	1.206	0.402	-0.025	0.01	0.003
R47	2016-10-19 23:00 PDT	CO2 clumped	OK	FALSE	ETH-3		Chewbacca	ETH-3-1	Calcite	2016-09-07 00:00:00 PDT	90	9	9	1.61	0	0	5.83	0	0	36.86	0	0	5.292	0.003	0.001	11.516	0.004	0.001	16.637	0.047	0.016	-0.202	0.047	0.016	24.444	0.159	0.053	1.251	0.154	0.051	-6.622	1.761	0.587	-34.172	1.711	0.57	0.053	0.014	0.005
R48	2016-10-20 12:05 PDT	CO2 clumped	OK	FALSE	BonedryDI U NH 10-17		Chewbacca	Unheated gas	CO2	2016-09-07 00:00:00 PDT		9	9	-37.54	0.01	0	10.43	0.01	0	41.61	0.01	0	-31.275	0.006	0.002	16.055	0.005	0.002	-17.051	0.05	0.017	-0.05	0.048	0.016	34.309	0.205	0.068	1.88	0.206	0.069	-0.443	1.962	0.654	2.181	1.967	0.656	0.004	0.016	0.005
R49	2016-10-20 14:15 PDT	CO2 clumped	OK	FALSE	ETH-4		Chewbacca	ETH-4-1	Calcite	2016-09-07 00:00:00 PDT	90	9	9	-10.21	0	0	-11	0.01	0	19.52	0.01	0	-6.377	0.003	0.001	-5.414	0.007	0.002	-12.304	0.049	0.016	-0.443	0.045	0.015	-11.628	0.166	0.055	-0.839	0.166	0.055	1.685	2.508	0.836	19.353	2.555	0.852	-0.014	0.02	0.007
R50	2016-10-20 22:53 PDT	CO2 clumped	OK	FALSE	TV03		Chewbacca	TV03	Calcite	2016-09-07 00:00:00 PDT	90	9	9	2.49	0	0	-0.78	0.01	0	30.05	0.01	0	5.893	0.003	0.001	4.878	0.007	0.002	10.687	0.049	0.016	-0.216	0.047	0.016	10.271	0.205	0.068	0.486	0.204	0.068	-4.897	1.321	0.44	-20.519	1.302	0.434	0.04	0.011	0.004
R51	2016-10-21 14:32 PDT	CO2 clumped	OK	FALSE	Carrera Marble		Chewbacca	Carrara Marble	Calcite	2016-09-07 00:00:00 PDT	90	9	9	1.95	0	0	6.12	0.01	0	37.17	0.01	0	5.618	0.003	0.001	11.815	0.007	0.002	16.992	0.037	0.012	-0.478	0.033	0.011	25.072	0.237	0.079	1.273	0.228	0.076	-5.505	1.582	0.527	-33.98	1.534	0.511	0.045	0.013	0.004
R52	2016-10-21 23:15 PDT	CO2 clumped	OK	FALSE	Vienstrom-01		Chewbacca	Veinstrom	Calcite	2016-09-07 00:00:00 PDT	90	9	9	-6.14	0	0	-4.94	0	0	25.77	0	0	-2.35	0.002	0.001	0.687	0.004	0.001	-2.012	0.038	0.013	-0.262	0.038	0.013	1.328	0.158	0.053	-0.047	0.159	0.053	0.573	2.116	0.705	1.732	2.117	0.706	-0.005	0.017	0.006
R53	2016-10-22 16:39 PDT	CO2 clumped	OK	FALSE	Bonedry DI UH		Chewbacca	Unheated gas	CO2	2016-09-07 00:00:00 PDT		9	9	-37.59	0.01	0	10.29	0.01	0	41.47	0.01	0	-31.32	0.006	0.002	15.916	0.007	0.002	-17.312	0.059	0.02	-0.133	0.059	0.02	34.041	0.288	0.096	1.895	0.28	0.093	-1.19	2.036	0.679	1.752	2.034	0.678	0.01	0.016	0.005
R54	2016-10-22 18:50 PDT	CO2 clumped	OK	FALSE	47 ETH-1		Chewbacca	ETH-1-1	Calcite	2016-09-07 00:00:00 PDT	90	9	9	1.89	0	0	5.33	0.01	0	36.35	0.01	0	5.538	0.002	0.001	11.014	0.005	0.002	16.036	0.035	0.012	-0.558	0.033	0.011	23.264	0.186	0.062	1.09	0.18	0.06	-5.32	1.657	0.552	-32.215	1.609	0.536	0.043	0.013	0.004
R55	2016-10-23 05:58 PDT	CO2 clumped	OK	FALSE	2 ETH-2		Chewbacca	ETH-2-1	Calcite	2016-09-07 00:00:00 PDT	90	9	9	-10.19	0	0	-11.09	0.01	0	19.43	0.01	0	-6.363	0.002	0.001	-5.499	0.008	0.003	-12.589	0.037	0.012	-0.663	0.037	0.012	-11.829	0.248	0.083	-0.871	0.243	0.081	4.32	2.847	0.949	22.191	2.901	0.967	-0.035	0.023	0.008
R56	2016-10-24 15:35 PDT	CO2 clumped	OK	FALSE	Carmel Chalk		Chewbacca	Carmel Chalk	Calcite	2016-09-07 00:00:00 PDT	90	9	9	-2.24	0	0	3.48	0.01	0	34.45	0.01	0	1.6	0.004	0.001	9.152	0.005	0.002	10.396	0.037	0.012	-0.265	0.033	0.011	19.369	0.301	0.1	0.962	0.286	0.095	-4.507	2.051	0.684	-23.835	2.01	0.67	0.035	0.016	0.005
R57	2016-10-25 00:24 PDT	CO2 clumped	OK	FALSE	TV03		Chewbacca	TV03	Calcite	2016-09-07 00:00:00 PDT	90	9	9	2.57	0	0	-0.7	0.01	0	30.13	0.01	0	5.964	0.003	0.001	4.959	0.007	0.002	10.81	0.042	0.014	-0.245	0.04	0.013	10.373	0.113	0.038	0.426	0.105	0.035	-2.193	2.962	0.987	-18.086	2.922	0.974	0.017	0.023	0.008
R58	2016-10-25 14:11 PDT	CO2 clumped	OK	FALSE	ETH-3		Chewbacca	ETH-3-1	Calcite	2016-09-07 00:00:00 PDT	90	9	9	1.64	0	0	5.8	0.01	0	36.84	0.01	0	5.32	0.003	0.001	11.487	0.008	0.003	16.628	0.04	0.013	-0.212	0.038	0.013	24.33	0.178	0.059	1.197	0.174	0.058	-7.116	3.983	1.328	-34.626	3.883	1.294	0.055	0.031	0.01
R59	2016-10-26 14:41 PDT	CO2 clumped	OK	FALSE	Carrera Marble-UCLA		Chewbacca	Carrara Marble	Calcite	2016-09-07 00:00:00 PDT	90	9	9	1.93	0	0	6.03	0	0	37.08	0	0	5.597	0.003	0.001	11.727	0.004	0.001	16.902	0.026	0.009	-0.46	0.029	0.01	24.783	0.171	0.057	1.163	0.165	0.055	-6.494	1.949	0.65	-34.756	1.887	0.629	0.052	0.016	0.005
R60	2016-10-27 01:40 PDT	CO2 clumped	OK	FALSE	VeinStrom-01		Chewbacca	Veinstrom	Calcite	2016-09-07 00:00:00 PDT	90	9	9	-6.19	0	0	-5.11	0.01	0	25.59	0.01	0	-2.4	0.003	0.001	0.513	0.006	0.002	-2.235	0.034	0.011	-0.263	0.035	0.012	1.138	0.187	0.062	0.112	0.186	0.062	-0.058	2.687	0.896	1.496	2.697	0.899	0.001	0.022	0.007
R61	2016-10-28 18:20 PDT	CO2 clumped	OK	FALSE	ETH-3		Chewbacca	ETH-3-1	Calcite	2016-09-07 00:00:00 PDT	90	9	9	1.6	0	0	5.65	0.01	0	36.68	0.01	0	5.274	0.003	0.001	11.339	0.006	0.002	16.422	0.035	0.012	-0.223	0.038	0.013	24.198	0.182	0.061	1.361	0.178	0.059	-8.976	2.184	0.728	-36.11	2.131	0.71	0.072	0.018	0.006
R62	2016-10-29 12:41 PDT	CO2 clumped	OK	FALSE	Bonedry DI UH 10/17 NH		Chewbacca	Unheated gas	CO2	2016-09-07 00:00:00 PDT		9	9	-37.46	0.01	0	10.54	0.01	0	41.72	0.01	0	-31.189	0.005	0.002	16.165	0.006	0.002	-16.894	0.038	0.013	-0.087	0.035	0.012	34.556	0.137	0.046	1.903	0.138	0.046	-0.05	1.989	0.663	2.269	1.998	0.666	0	0.016	0.005
R63	2016-10-29 14:50 PDT	CO2 clumped	OK	FALSE	Vientstrom-01		Chewbacca	Veinstrom	Calcite	2016-09-07 00:00:00 PDT	90	9	9	-6.2	0	0	-4.84	0	0	25.87	0	0	-2.403	0.003	0.001	0.782	0.005	0.002	-1.961	0.063	0.021	-0.25	0.063	0.021	1.651	0.17	0.057	0.086	0.168	0.056	0.008	1.939	0.646	1.036	1.943	0.648	0	0.016	0.005
R64	2016-10-29 23:25 PDT	CO2 clumped	OK	FALSE	TVO3		Chewbacca	TV03	Calcite	2016-09-07 00:00:00 PDT	90	9	9	2.34	0	0	-0.85	0.01	0	29.98	0.01	0	5.747	0.003	0.001	4.811	0.006	0.002	10.472	0.028	0.009	-0.212	0.026	0.009	10.149	0.185	0.062	0.5	0.179	0.06	-2.519	2.811	0.937	-17.897	2.768	0.923	0.021	0.023	0.008
R65	2016-10-30 13:04 PDT	CO2 clumped	OK	FALSE	Carrera Marble		Chewbacca	Carrara Marble	Calcite	2016-09-07 00:00:00 PDT	90	9	9	2.18	0	0	5.86	0.01	0	36.9	0.01	0	5.828	0.001	0	11.556	0.005	0.002	16.98	0.042	0.014	-0.453	0.044	0.015	24.354	0.215	0.072	1.084	0.203	0.068	-6.318	1.95	0.65	-34.499	1.896	0.632	0.052	0.016	0.005
R66	2016-10-31 00:14 PDT	CO2 clumped	OK	FALSE	ETH-1		Chewbacca	ETH-1-1	Calcite	2016-09-07 00:00:00 PDT	90	9	9	2.01	0	0	5.29	0	0	36.31	0	0	5.649	0.002	0.001	10.976	0.004	0.001	16.09	0.042	0.014	-0.582	0.04	0.013	23.262	0.234	0.078	1.164	0.226	0.075	-6.536	2.793	0.931	-33.44	2.719	0.906	0.054	0.023	0.008
R67	2016-10-31 13:19 PDT	CO2 clumped	OK	FALSE	BonedryDI UH DU 10-14		Chewbacca	Unheated gas	CO2	2016-09-07 00:00:00 PDT		9	9	-37.59	0	0	-1.68	0.01	0	29.13	0.01	0	-31.734	0.005	0.002	3.897	0.006	0.002	-29.17	0.059	0.02	-0.138	0.056	0.019	8.373	0.21	0.07	0.559	0.206	0.069	-0.125	1.599	0.533	26.999	1.645	0.548	0.001	0.013	0.004
R68	2016-10-31 15:28 PDT	CO2 clumped	OK	FALSE	ETH-4		Chewbacca	ETH-4-1	Calcite	2016-09-07 00:00:00 PDT	90	9	9	-10.16	0	0	-10.96	0.01	0	19.56	0.01	0	-6.331	0.002	0.001	-5.374	0.009	0.003	-12.217	0.039	0.013	-0.442	0.039	0.013	-11.419	0.179	0.06	-0.707	0.178	0.059	3.251	2.037	0.679	20.817	2.077	0.692	-0.027	0.017	0.006
R69	2016-11-01 00:13 PDT	CO2 clumped	OK	FALSE	TV03		Chewbacca	TV03	Calcite	2016-09-07 00:00:00 PDT	90	9	9	2.56	0	0	-0.67	0.01	0	30.17	0.01	0	5.961	0.002	0.001	4.989	0.008	0.003	10.824	0.044	0.015	-0.258	0.043	0.014	10.469	0.193	0.064	0.462	0.182	0.061	-2.002	2.443	0.814	-17.953	2.404	0.801	0.017	0.02	0.007
R70	2016-11-01 16:44 PDT	CO2 clumped	OK	FALSE	Carmel Chalk		Chewbacca	Carmel Chalk	Calcite	2016-09-07 00:00:00 PDT	90	9	9	-2.25	0	0	3.47	0	0	34.43	0	0	1.594	0.004	0.001	9.138	0.004	0.001	10.371	0.037	0.012	-0.269	0.037	0.012	19.298	0.126	0.042	0.921	0.121	0.04	-4.319	2.009	0.67	-23.618	1.971	0.657	0.036	0.017	0.006
R71	2016-11-02 01:34 PDT	CO2 clumped	OK	FALSE	ETH-2		Chewbacca	ETH-2-1	Calcite	2016-09-07 00:00:00 PDT	90	9	9	-10.15	0	0	-10.86	0.01	0	19.67	0.01	0	-6.316	0.003	0.001	-5.268	0.009	0.003	-12.311	0.044	0.015	-0.658	0.038	0.013	-11.412	0.309	0.103	-0.913	0.301	0.1	3.076	1.498	0.499	20.409	1.531	0.51	-0.025	0.012	0.004
R72	2016-11-02 12:49 PDT	CO2 clumped	OK	FALSE	BonedryDI H DU 10-28		Chewbacca	Heated Gas	CO2	2016-09-07 00:00:00 PDT		9	9	-36.93	0.01	0	-3.02	0.01	0	27.75	0.01	0	-31.163	0.006	0.002	2.548	0.008	0.003	-30.5	0.039	0.013	-0.796	0.033	0.011	5.634	0.234	0.078	0.528	0.234	0.078	-15.933	2.392	0.797	12.797	2.472	0.824	0.129	0.02	0.007
R73	2016-11-03 04:50 PDT	CO2 clumped	OK	FALSE	Carrera Marble-UCLA		Chewbacca	Carrara Marble	Calcite	2016-09-07 00:00:00 PDT	90	9	9	2	0	0	6.21	0.01	0	37.26	0.01	0	5.677	0.003	0.001	11.905	0.006	0.002	17.154	0.039	0.013	-0.467	0.038	0.013	25.091	0.167	0.056	1.112	0.169	0.056	-4.923	1.797	0.599	-33.646	1.748	0.583	0.04	0.015	0.005
R74	2016-11-03 17:25 PDT	CO2 clumped	OK	FALSE	TV03		Chewbacca	TV03	Calcite	2016-09-07 00:00:00 PDT	90	9	9	2.57	0	0	-0.69	0	0	30.15	0	0	5.972	0.002	0.001	4.97	0.005	0.002	10.867	0.041	0.014	-0.208	0.043	0.014	10.543	0.135	0.045	0.572	0.139	0.046	-10.873	1.559	0.52	-26.658	1.534	0.511	0.088	0.013	0.004
R75	2016-11-03 22:48 PDT	CO2 clumped	OK	FALSE	Carmel Chalk		Chewbacca	Carmel Chalk	Calcite	2016-09-07 00:00:00 PDT	90	9	9	-2.18	0	0	3.73	0	0	34.71	0	0	1.669	0.003	0.001	9.406	0.004	0.001	10.718	0.053	0.018	-0.264	0.051	0.017	19.892	0.213	0.071	0.973	0.209	0.07	-4.651	2.611	0.87	-24.531	2.557	0.852	0.037	0.021	0.007
R76	2016-11-04 00:57 PDT	CO2 clumped	OK	FALSE	ETH-4		Chewbacca	ETH-4-1	Calcite	2016-09-07 00:00:00 PDT	90	9	9	-10.17	0	0	-11.21	0.01	0	19.31	0.01	0	-6.348	0.002	0.001	-5.619	0.007	0.002	-12.517	0.034	0.011	-0.486	0.038	0.013	-12.162	0.103	0.034	-0.967	0.103	0.034	5.105	1.461	0.487	23.217	1.498	0.499	-0.041	0.012	0.004
R77	2016-11-04 14:59 PDT	CO2 clumped	OK	FALSE	ETH-2		Chewbacca	ETH-2-1	Calcite	2016-09-07 00:00:00 PDT	90	9	9	-10.2	0	0	-10.94	0.01	0	19.58	0.01	0	-6.369	0.004	0.001	-5.355	0.006	0.002	-12.468	0.036	0.012	-0.675	0.03	0.01	-11.509	0.138	0.046	-0.836	0.141	0.047	3.448	2.3	0.767	21.021	2.347	0.782	-0.028	0.019	0.006
R78	2016-11-06 21:58 PST	CO2 clumped	OK	FALSE	Veinstrom		Chewbacca	Veinstrom	Calcite	2016-09-07 00:00:00 PDT	90	9	9	-6.23	0	0	-5.07	0	0	25.64	0	0	-2.434	0.003	0.001	0.555	0.005	0.002	-2.254	0.037	0.012	-0.289	0.037	0.012	1.224	0.151	0.05	0.113	0.152	0.051	1.004	1.587	0.529	2.512	1.591	0.53	-0.008	0.013	0.004
R79	2016-11-07 14:53 PST	CO2 clumped	OK	FALSE	ETH-1		Chewbacca	ETH-1-1	Calcite	2016-09-07 00:00:00 PDT	90	9	9	1.99	0	0	5.4	0.01	0	36.42	0.01	0	5.634	0.001	0	11.086	0.005	0.002	16.212	0.039	0.013	-0.554	0.038	0.013	23.385	0.138	0.046	1.066	0.139	0.046	-4.491	1.488	0.496	-31.643	1.448	0.483	0.038	0.013	0.004
R80	2016-11-07 23:34 PST	CO2 clumped	OK	FALSE	ETH-3		Chewbacca	ETH-3-1	Calcite	2016-09-07 00:00:00 PDT	90	9	9	1.63	0	0	5.84	0.01	0	36.88	0.01	0	5.313	0.003	0.001	11.531	0.006	0.002	16.675	0.033	0.011	-0.202	0.033	0.011	24.361	0.207	0.069	1.139	0.204	0.068	-5.064	1.419	0.473	-32.708	1.384	0.461	0.043	0.012	0.004
R81	2016-11-08 15:32 PST	CO2 clumped	OK	FALSE	Carmel Chalk		Chewbacca	Carmel Chalk	Calcite	2016-09-07 00:00:00 PDT	90	9	9	-2.2	0	0	3.46	0.01	0	34.42	0.01	0	1.639	0.002	0.001	9.127	0.007	0.002	10.431	0.046	0.015	-0.245	0.046	0.015	19.368	0.155	0.052	1.012	0.151	0.05	-5.18	2.534	0.845	-24.488	2.483	0.828	0.043	0.021	0.007
R82	2016-11-09 00:13 PST	CO2 clumped	OK	FALSE	TV03		Chewbacca	TV03	Calcite	2016-09-07 00:00:00 PDT	90	9	9	2.62	0	0	-0.96	0.01	0	29.87	0.01	0	6.009	0.004	0.001	4.703	0.005	0.002	10.608	0.046	0.015	-0.241	0.044	0.015	9.854	0.186	0.062	0.422	0.18	0.06	-2.814	1.467	0.489	-18.253	1.452	0.484	0.024	0.012	0.004
R83	2016-11-09 14:39 PST	CO2 clumped	OK	FALSE	Vein strom UCLA-1		Chewbacca	Veinstrom	Calcite	2016-09-07 00:00:00 PDT	90	9	9	-6.26	0	0	-4.98	0.01	0	25.72	0.01	0	-2.468	0.003	0.001	0.639	0.005	0.002	-2.19	0.047	0.016	-0.272	0.051	0.017	1.174	0.198	0.066	-0.105	0.198	0.066	-0.48	1.645	0.548	0.898	1.647	0.549	0.004	0.014	0.005
R84	2016-11-09 23:19 PST	CO2 clumped	OK	FALSE	Carmel Chalk		Chewbacca	Carmel Chalk	Calcite	2016-09-07 00:00:00 PDT	90	9	9	-2.18	0	0	3.78	0.01	0	34.76	0.01	0	1.663	0.003	0.001	9.457	0.007	0.002	10.765	0.034	0.011	-0.261	0.036	0.012	19.864	0.166	0.055	0.844	0.165	0.055	-2.658	1.121	0.374	-22.668	1.104	0.368	0.022	0.009	0.003
R85	2016-11-10 16:32 PST	CO2 clumped	OK	FALSE	Carrera Marvble		Chewbacca	Carrara Marble	Calcite	2016-09-07 00:00:00 PDT	90	9	9	1.94	0	0	6.02	0.01	0	37.07	0.01	0	5.613	0.002	0.001	11.715	0.005	0.002	16.921	0.028	0.009	-0.446	0.03	0.01	24.586	0.142	0.047	0.996	0.135	0.045	-6.948	1.793	0.598	-35.19	1.739	0.58	0.059	0.015	0.005
R86	2016-11-11 14:45 PST	CO2 clumped	OK	FALSE	ETH-1		Chewbacca	ETH-1-1	Calcite	2016-09-07 00:00:00 PDT	90	9	9	1.97	0	0	5.43	0.01	0	36.46	0.01	0	5.617	0.003	0.001	11.119	0.005	0.002	16.229	0.035	0.012	-0.552	0.035	0.012	23.589	0.182	0.061	1.2	0.178	0.059	-7.959	2.055	0.685	-35.061	2.001	0.667	0.068	0.018	0.006
R87	2016-11-12 00:40 PST	CO2 clumped	OK	FALSE	ETH-4		Chewbacca	ETH-4-1	Calcite	2016-09-07 00:00:00 PDT	90	9	9	-10.15	0	0	-10.95	0.01	0	19.57	0.01	0	-6.315	0.003	0.001	-5.366	0.006	0.002	-12.223	0.018	0.006	-0.473	0.02	0.007	-11.408	0.165	0.055	-0.712	0.163	0.054	2.932	2.359	0.786	20.459	2.405	0.802	-0.025	0.02	0.007
R88	2016-11-12 15:32 PST	CO2 clumped	OK	FALSE	TV03		Chewbacca	TV03	Calcite	2016-09-07 00:00:00 PDT	90	9	9	2.5	0	0	-0.7	0.01	0	30.14	0.01	0	5.906	0.002	0.001	4.967	0.005	0.002	10.793	0.047	0.016	-0.21	0.048	0.016	10.467	0.231	0.077	0.504	0.228	0.076	-3.728	1.973	0.658	-19.552	1.944	0.648	0.032	0.017	0.006
R89	2016-11-13 00:19 PST	CO2 clumped	OK	FALSE	VeinStrom		Chewbacca	Veinstrom	Calcite	2016-09-07 00:00:00 PDT	90	9	9	-6.13	0	0	-4.88	0.01	0	25.83	0.01	0	-2.338	0.002	0.001	0.749	0.006	0.002	-1.937	0.029	0.01	-0.26	0.033	0.011	1.573	0.098	0.033	0.074	0.104	0.035	0.545	1.467	0.489	1.569	1.469	0.49	-0.005	0.013	0.004
R90	2016-11-14 15:02 PST	CO2 clumped	OK	FALSE	ETH-2		Chewbacca	ETH-2-1	Calcite	2016-09-07 00:00:00 PDT	90	9	9	-10.27	0	0	-11	0.01	0	19.52	0.01	0	-6.435	0.003	0.001	-5.409	0.008	0.003	-12.586	0.037	0.012	-0.672	0.032	0.011	-11.598	0.17	0.057	-0.817	0.173	0.058	1.426	2.313	0.771	19.145	2.35	0.783	-0.012	0.02	0.007
R91	2016-11-15 00:23 PST	CO2 clumped	OK	FALSE	ETH-3		Chewbacca	ETH-3-1	Calcite	2016-09-07 00:00:00 PDT	90	9	9	1.54	0	0	5.56	0	0	36.59	0	0	5.219	0.002	0.001	11.245	0.005	0.002	16.285	0.028	0.009	-0.211	0.029	0.01	24.001	0.213	0.071	1.355	0.212	0.071	-6.19	1.025	0.342	-33.168	0.999	0.333	0.053	0.009	0.003
R92	2016-11-15 14:34 PST	CO2 clumped	OK	FALSE	ETH-3		Chewbacca	ETH-3-1	Calcite	2016-09-07 00:00:00 PDT	90	9	9	1.57	0	0	5.79	0.01	0	36.83	0.01	0	5.258	0.003	0.001	11.482	0.005	0.002	16.539	0.055	0.018	-0.231	0.053	0.018	24.516	0.253	0.084	1.388	0.245	0.082	-5.065	2.643	0.881	-32.56	2.568	0.856	0.044	0.023	0.008
R93	2016-11-16 23:19 PST	CO2 clumped	OK	FALSE	TV03		Chewbacca	TV03	Calcite	2016-09-07 00:00:00 PDT	90	9	9	2.59	0	0	-0.84	0	0	30	0	0	5.984	0.003	0.001	4.824	0.004	0.001	10.714	0.054	0.018	-0.229	0.052	0.017	10.305	0.181	0.06	0.628	0.183	0.061	-3.551	2.047	0.682	-19.184	2.014	0.671	0.031	0.018	0.006
R94	2016-11-17 15:53 PST	CO2 clumped	OK	FALSE	Carmel Chalk		Chewbacca	Carmel Chalk	Calcite	2016-09-07 00:00:00 PDT	90	9	9	-2.14	0	0	3.61	0	0	34.58	0	0	1.701	0.003	0.001	9.28	0.002	0.001	10.649	0.039	0.013	-0.243	0.038	0.013	19.76	0.172	0.057	1.094	0.171	0.057	-4.81	1.679	0.56	-24.48	1.643	0.548	0.042	0.015	0.005
R95	2016-11-18 00:39 PST	CO2 clumped	OK	FALSE	Carrera Marble		Chewbacca	Carrara Marble	Calcite	2016-09-07 00:00:00 PDT	90	9	9	1.95	0	0	6.05	0	0	37.1	0.01	0	5.619	0.002	0.001	11.746	0.005	0.002	16.948	0.036	0.012	-0.456	0.031	0.01	25.06	0.163	0.054	1.397	0.158	0.053	-7.008	2.017	0.672	-35.313	1.956	0.652	0.061	0.018	0.006
R96	2016-11-18 16:02 PST	CO2 clumped	OK	FALSE	Veinstrom-01		Chewbacca	Veinstrom	Calcite	2016-09-07 00:00:00 PDT	90	9	9	-6.19	0	0	-4.93	0.01	0	25.78	0.01	0	-2.395	0.003	0.001	0.692	0.005	0.002	-2.065	0.032	0.011	-0.273	0.03	0.01	1.415	0.093	0.031	0.031	0.095	0.032	-0.315	1.816	0.605	0.882	1.821	0.607	0.003	0.016	0.005
R97	2016-11-19 14:17 PST	CO2 clumped	OK	FALSE	BonedryDI H DU		Chewbacca	Heated Gas	CO2	2016-09-07 00:00:00 PDT		9	9	-36.96	0.01	0	-3.79	0	0	26.96	0	0	-31.219	0.005	0.002	1.779	0.005	0.002	-31.293	0.046	0.015	-0.801	0.046	0.015	4.014	0.185	0.062	0.452	0.182	0.061	-14.759	1.801	0.6	15.597	1.863	0.621	0.128	0.016	0.005
R98	2016-11-19 22:51 PST	CO2 clumped	OK	FALSE	ETH-4		Chewbacca	ETH-4-1	Calcite	2016-09-07 00:00:00 PDT	90	9	9	-10.17	0	0	-10.96	0.01	0	19.56	0.01	0	-6.339	0.004	0.001	-5.373	0.007	0.002	-12.267	0.029	0.01	-0.485	0.025	0.008	-11.625	0.233	0.078	-0.917	0.229	0.076	3.336	1.457	0.486	20.911	1.484	0.495	-0.029	0.013	0.004
R99	2016-11-20 21:54 PST	CO2 clumped	OK	FALSE	TV03		Chewbacca	TV03	Calcite	2016-09-07 00:00:00 PDT	90	9	9	2.54	0	0	-0.75	0.01	0	30.09	0.01	0	5.938	0.003	0.001	4.91	0.008	0.003	10.745	0.065	0.022	-0.235	0.062	0.021	10.367	0.194	0.065	0.517	0.194	0.065	-1.298	2.554	0.851	-17.085	2.518	0.839	0.011	0.022	0.007
R100	2016-11-21 23:43 PST	CO2 clumped	OK	FALSE	Carmel Chalk		Chewbacca	Carmel Chalk	Calcite	2016-09-07 00:00:00 PDT	90	9	9	-2.12	0	0	3.7	0.01	0	34.67	0.01	0	1.718	0.003	0.001	9.369	0.005	0.002	10.742	0.04	0.013	-0.255	0.04	0.013	19.844	0.15	0.05	0.999	0.147	0.049	-2.044	1.871	0.624	-21.956	1.835	0.612	0.018	0.017	0.006
R101	2016-11-23 15:04 PST	CO2 clumped	OK	FALSE	Carrera Marble-UCLA		Chewbacca	Carrara Marble	Calcite	2016-09-07 00:00:00 PDT	90	9	9	1.96	0	0	6.08	0.01	0	37.12	0.01	0	5.63	0.002	0.001	11.768	0.006	0.002	16.974	0.04	0.013	-0.464	0.039	0.013	25.103	0.177	0.059	1.395	0.177	0.059	-7.496	2.557	0.852	-35.84	2.486	0.829	0.066	0.023	0.008
R102	2016-11-28 22:54 PST	CO2 clumped	OK	FALSE	ETH-3		Chewbacca	ETH-3-1	Calcite	2016-09-07 00:00:00 PDT	90	9	9	1.61	0	0	5.78	0	0	36.82	0	0	5.292	0.002	0.001	11.473	0.005	0.002	16.596	0.035	0.012	-0.201	0.034	0.011	24.375	0.172	0.057	1.269	0.164	0.055	-5.126	3.461	1.154	-32.636	3.364	1.121	0.043	0.029	0.01
R103	2016-11-29 15:26 PST	CO2 clumped	OK	FALSE	Carmel Chalk		Chewbacca	Carmel Chalk	Calcite	2016-09-07 00:00:00 PDT	90	9	9	-2.26	0	0	3.57	0.01	0	34.54	0.01	0	1.583	0.003	0.001	9.239	0.006	0.002	10.495	0.042	0.014	-0.233	0.044	0.015	19.638	0.202	0.067	1.055	0.201	0.067	-3.117	2.95	0.983	-22.621	2.89	0.963	0.027	0.025	0.008
R104	2016-11-30 04:20 PST	CO2 clumped	OK	FALSE	Veinstrom		Chewbacca	Veinstrom	Calcite	2016-09-07 00:00:00 PDT	90	9	9	-6.2	0	0	-4.97	0	0	25.73	0	0	-2.41	0.002	0.001	0.65	0.002	0.001	-2.118	0.047	0.016	-0.27	0.047	0.016	1.378	0.149	0.05	0.077	0.151	0.05	-1.712	2.595	0.865	-0.42	2.596	0.865	0.015	0.023	0.008
R105	2016-11-30 13:03 PST	CO2 clumped	OK	FALSE	BonedryDI UH GJ 10-14-16		Chewbacca	Unheated gas	CO2	2016-09-07 00:00:00 PDT		9	9	-37.57	0.01	0	-1.82	0.01	0	28.98	0.01	0	-31.717	0.005	0.002	3.748	0.009	0.003	-29.298	0.035	0.012	-0.143	0.037	0.012	8.048	0.179	0.06	0.532	0.175	0.058	3.234	2.197	0.732	30.73	2.258	0.753	-0.028	0.019	0.006
R106	2016-11-30 15:15 PST	CO2 clumped	OK	FALSE	ETH-3		Chewbacca	ETH-3-1	Calcite	2016-09-07 00:00:00 PDT	90	9	9	1.58	0	0	5.73	0	0	36.77	0	0	5.262	0.003	0.001	11.422	0.002	0.001	16.5	0.034	0.011	-0.214	0.033	0.011	24.391	0.187	0.062	1.385	0.181	0.06	-3.86	1.659	0.553	-31.278	1.609	0.536	0.034	0.014	0.005
R107	2016-11-30 21:31 PST	CO2 clumped	OK	FALSE	Veinstrom UCLA-2		Chewbacca	Veinstrom	Calcite	2016-09-07 00:00:00 PDT	90	9	9	-6.16	0	0	-5	0	0	25.71	0	0	-2.372	0.002	0.001	0.623	0.005	0.002	-2.124	0.027	0.009	-0.289	0.03	0.01	1.281	0.17	0.057	0.034	0.17	0.057	0.394	2.916	0.972	1.701	2.927	0.976	-0.003	0.025	0.008
R108	2016-12-01 15:15 PST	CO2 clumped	OK	FALSE	Carrara Marble		Chewbacca	Carrara Marble	Calcite	2016-09-07 00:00:00 PDT	90	9	9	1.95	0	0	6.08	0.01	0	37.12	0.01	0	5.623	0.003	0.001	11.769	0.006	0.002	17.004	0.033	0.011	-0.427	0.03	0.01	25.072	0.135	0.045	1.364	0.134	0.045	-7.274	1.59	0.53	-35.618	1.547	0.516	0.061	0.013	0.004
R109	2016-12-01 23:56 PST	CO2 clumped	OK	FALSE	TV03		Chewbacca	TV03	Calcite	2016-09-07 00:00:00 PDT	90	9	9	2.5	0	0	-0.72	0.01	0	30.12	0.01	0	5.903	0.002	0.001	4.943	0.005	0.002	10.704	0.05	0.017	-0.272	0.049	0.016	10.435	0.233	0.078	0.52	0.226	0.075	-0.344	2.147	0.716	-16.173	2.112	0.704	0.003	0.018	0.006
R110	2016-12-05 23:34 PST	CO2 clumped	OK	FALSE	ETH-3		Chewbacca	ETH-3-1	Calcite	2016-09-07 00:00:00 PDT	90	9	9	1.48	0	0	5.58	0	0	36.61	0	0	5.16	0.003	0.001	11.267	0.005	0.002	16.246	0.03	0.01	-0.21	0.032	0.011	24.108	0.162	0.054	1.415	0.154	0.051	-5.529	1.709	0.57	-32.506	1.661	0.554	0.048	0.015	0.005
R111	2016-12-09 16:30 PST	CO2 clumped	OK	FALSE	BonedryDI UH DU 10-14		Chewbacca	Unheated gas	CO2	2016-09-07 00:00:00 PDT		9	9	-37.66	0	0	-1.94	0.01	0	28.86	0.01	0	-31.813	0.005	0.002	3.632	0.015	0.005	-29.496	0.041	0.014	-0.131	0.045	0.015	7.733	0.251	0.084	0.453	0.249	0.083	2.053	2.545	0.848	29.86	2.61	0.87	-0.017	0.022	0.007
R112	2016-12-09 18:38 PST	CO2 clumped	OK	FALSE	Carrera Marble		Chewbacca	Carrara Marble	Calcite	2016-09-07 00:00:00 PDT	90	9	9	1.93	0	0	6.02	0	0	37.06	0	0	5.603	0.003	0.001	11.71	0.004	0.001	16.887	0.049	0.016	-0.464	0.049	0.016	24.767	0.218	0.073	1.182	0.21	0.07	-5.642	1.669	0.556	-33.902	1.624	0.541	0.048	0.014	0.005
R113	2016-12-09 20:47 PST	CO2 clumped	OK	FALSE	TV03		Chewbacca	TV03	Calcite	2016-09-07 00:00:00 PDT	90	9	9	2.59	0	0	-0.86	0	0	29.97	0	0	5.983	0.003	0.001	4.8	0.004	0.001	10.71	0.047	0.016	-0.209	0.049	0.016	10.154	0.158	0.053	0.526	0.158	0.053	-2.373	1.964	0.655	-17.978	1.933	0.644	0.02	0.017	0.006
R114	2016-12-09 22:54 PST	CO2 clumped	OK	FALSE	Carmel Chalk		Chewbacca	Carmel Chalk	Calcite	2016-09-07 00:00:00 PDT	90	9	9	-2.21	0	0	3.52	0.01	0	34.49	0.01	0	1.627	0.003	0.001	9.189	0.006	0.002	10.471	0.033	0.011	-0.255	0.032	0.011	19.442	0.158	0.053	0.962	0.158	0.053	-3.043	1.827	0.609	-22.498	1.791	0.597	0.026	0.016	0.005
R115	2016-12-10 01:03 PST	CO2 clumped	OK	FALSE	Veinstrom		Chewbacca	Veinstrom	Calcite	2016-09-07 00:00:00 PDT	90	9	9	-6.19	0	0	-5.06	0.01	0	25.65	0.01	0	-2.402	0.002	0.001	0.568	0.009	0.003	-2.198	0.038	0.013	-0.277	0.042	0.014	1.177	0.259	0.086	0.041	0.253	0.084	1.142	2.136	0.712	2.593	2.126	0.709	-0.01	0.018	0.006
R116	2016-12-13 15:21 PST	CO2 clumped	OK	FALSE	ETH-1		Chewbacca	ETH-1-1	Calcite	2016-09-07 00:00:00 PDT	90	9	9	1.93	0	0	5.32	0.01	0	36.34	0.01	0	5.579	0.002	0.001	11.009	0.006	0.002	16.085	0.036	0.012	-0.548	0.04	0.013	23.447	0.125	0.042	1.279	0.127	0.042	-8.613	2.312	0.771	-35.452	2.243	0.748	0.076	0.02	0.007
R117	2016-12-13 17:37 PST	CO2 clumped	OK	FALSE	ETH-3		Chewbacca	ETH-3-1	Calcite	2016-09-07 00:00:00 PDT	90	9	9	1.47	0	0	5.47	0	0	36.5	0	0	5.153	0.004	0.001	11.156	0.004	0.001	16.155	0.041	0.014	-0.184	0.041	0.014	23.676	0.126	0.042	1.212	0.123	0.041	-6.953	2.158	0.719	-33.677	2.098	0.699	0.061	0.019	0.006
R118	2016-12-14 12:54 PST	CO2 clumped	OK	FALSE	BonedryDI UH CW 12-5-16		Chewbacca	Unheated gas	CO2	2016-09-07 00:00:00 PDT		9	9	-37.48	0	0	10.8	0.01	0	41.99	0.01	0	-31.2	0.003	0.001	16.429	0.007	0.002	-16.644	0.052	0.017	-0.076	0.056	0.019	35.532	0.23	0.077	2.327	0.218	0.073	-3.483	1.66	0.553	-1.67	1.665	0.555	0.031	0.015	0.005
R119	2016-12-16 13:40 PST	CO2 clumped	OK	FALSE	BonedryDI H CW 12-5-16		Chewbacca	Heated Gas	CO2	2016-09-07 00:00:00 PDT		9	9	-37.61	0	0	0.9	0	0	31.79	0.01	0	-31.662	0.005	0.002	6.484	0.005	0.002	-27.294	0.061	0.02	-0.813	0.063	0.021	13.717	0.15	0.05	0.698	0.147	0.049	0.256	1.496	0.499	22.131	1.53	0.51	-0.002	0.013	0.004
R120	2016-12-16 15:51 PST	CO2 clumped	OK	FALSE	Carrera Marble		Chewbacca	Carrara Marble	Calcite	2016-09-07 00:00:00 PDT	90	9	9	1.79	0	0	5.79	0	0	36.82	0	0	5.463	0.002	0.001	11.476	0.004	0.001	16.518	0.035	0.012	-0.456	0.031	0.01	24.449	0.231	0.077	1.334	0.227	0.076	-6.551	2.227	0.742	-34.204	2.164	0.721	0.058	0.02	0.007
R121	2016-12-18 11:05 PST	CO2 clumped	OK	FALSE	BonedryDI UH DH 11-3-16		Chewbacca	Unheated gas	CO2	2016-09-07 00:00:00 PDT		9	9	-37.57	0	0	10.55	0.01	0	41.74	0.01	0	-31.291	0.005	0.002	16.18	0.007	0.002	-17.046	0.028	0.009	-0.148	0.031	0.01	34.756	0.112	0.037	2.065	0.111	0.037	-2.343	1.658	0.553	0.052	1.667	0.556	0.02	0.014	0.005
R122	2016-12-19 11:38 PST	CO2 clumped	OK	FALSE	Bonedry + DI UH NH 10.17.16		Chewbacca	Unheated gas	CO2	2016-09-07 00:00:00 PDT		9	9	-37.53	0	0	10.58	0	0	41.76	0	0	-31.253	0.004	0.001	16.204	0.005	0.002	-16.902	0.046	0.015	-0.065	0.047	0.016	35.141	0.196	0.065	2.391	0.189	0.063	-2.989	1.495	0.498	-0.684	1.502	0.501	0.026	0.013	0.004
R123	2016-12-19 22:16 PST	CO2 clumped	OK	FALSE	TV03		Chewbacca	TV03	Calcite	2016-09-07 00:00:00 PDT	90	9	9	2.43	0	0	-0.92	0	0	29.91	0	0	5.825	0.002	0.001	4.742	0.004	0.001	10.459	0.021	0.007	-0.238	0.02	0.007	9.866	0.249	0.083	0.356	0.245	0.082	-2.742	2.191	0.73	-18.066	2.162	0.721	0.024	0.019	0.006
R124	2016-12-20 11:34 PST	CO2 clumped	OK	FALSE	Bonedry + DI UH CW 9.23.16		Chewbacca	Unheated gas	CO2	2016-09-07 00:00:00 PDT		9	9	-37.02	0	0	-0.09	0	0	30.76	0	0	-31.144	0.003	0.001	5.489	0.004	0.001	-27.038	0.057	0.019	-0.131	0.059	0.02	11.735	0.212	0.071	0.719	0.209	0.07	3.951	1.897	0.632	27.313	1.946	0.649	-0.035	0.017	0.006
R125	2016-12-20 21:00 PST	CO2 clumped	OK	FALSE	ETH-3		Chewbacca	ETH-3-1	Calcite	2016-09-07 00:00:00 PDT	90	9	9	1.58	0	0	5.55	0	0	36.58	0	0	5.252	0.003	0.001	11.237	0.004	0.001	16.325	0.051	0.017	-0.197	0.051	0.017	23.89	0.226	0.075	1.262	0.22	0.073	-5.776	1.686	0.562	-32.784	1.639	0.546	0.051	0.015	0.005
R126	2016-12-21 12:05 PST	CO2 clumped	OK	FALSE	Bonedry + DI UH GJ 11.3.16		Chewbacca	Unheated gas	CO2	2016-09-07 00:00:00 PDT		9	9	-37.24	0	0	11.1	0	0	42.3	0	0	-30.969	0.004	0.001	16.732	0.003	0.001	-16.145	0.03	0.01	-0.109	0.029	0.01	35.966	0.175	0.058	2.15	0.167	0.056	-1.978	1.405	0.468	-1.002	1.407	0.469	0.018	0.012	0.004
R127	2016-12-21 14:13 PST	CO2 clumped	OK	FALSE	Carmel Marble		Chewbacca	Carrara Marble	Calcite	2016-09-07 00:00:00 PDT	90	9	9	2.26	0	0	5.76	0.01	0	36.8	0.01	0	5.9	0.002	0.001	11.456	0.007	0.002	16.976	0.024	0.008	-0.434	0.022	0.007	24.328	0.123	0.041	1.256	0.118	0.039	-5.448	1.854	0.618	-33.54	1.802	0.601	0.048	0.017	0.006
R128	2016-12-22 11:50 PST	CO2 clumped	OK	FALSE	Evap DI + CM UH WD 12.21.16		Chewbacca	Unheated gas	CO2	2016-09-07 00:00:00 PDT		9	9	1.95	0	0	17.49	0.01	0	48.89	0.01	0	6.01	0.002	0.001	23.237	0.006	0.002	29.264	0.03	0.01	0.077	0.033	0.011	50.252	0.183	0.061	3.092	0.176	0.059	-11.28	1.448	0.483	-60.935	1.378	0.459	0.102	0.013	0.004
R129	2016-12-22 22:38 PST	CO2 clumped	OK	FALSE	ETH-4		Chewbacca	ETH-4-1	Calcite	2016-09-07 00:00:00 PDT	90	9	9	-10.2	0	0	-11.39	0	0	19.12	0	0	-6.385	0.002	0.001	-5.807	0.004	0.001	-12.731	0.043	0.014	-0.479	0.043	0.014	-12.529	0.23	0.077	-0.96	0.233	0.078	3.348	1.937	0.646	21.848	1.974	0.658	-0.03	0.017	0.006
R130	2016-12-23 14:04 PST	CO2 clumped	OK	FALSE	Evap DI+CM H WD 12-21-16		Chewbacca	Unheated gas	CO2	2016-09-07 00:00:00 PDT		9	9	1.98	0	0	18.7	0	0	50.13	0	0	6.087	0.003	0.001	24.447	0.005	0.002	30.525	0.03	0.01	0.062	0.028	0.009	52.803	0.166	0.055	3.156	0.158	0.053	-9.894	2.249	0.75	-61.875	2.127	0.709	0.089	0.02	0.007
R131	2016-12-23 16:12 PST	CO2 clumped	OK	FALSE	ETH-3		Chewbacca	ETH-3-1	Calcite	2016-09-07 00:00:00 PDT	90	10	10	1.68	0	0	5.68	0	0	36.71	0	0	5.352	0.002	0.001	11.369	0.003	0.001	16.547	0.034	0.011	-0.209	0.033	0.01	24.254	0.198	0.063	1.356	0.196	0.062	-5.725	3.051	0.965	-33.085	2.968	0.938	0.051	0.027	0.009
R132	2016-12-26 11:42 PST	CO2 clumped	OK	FALSE	Evap DI + CM UH WD 12.21.16		Chewbacca	Unheated gas	CO2	2016-09-07 00:00:00 PDT		9	9	2.09	0	0	19.13	0.01	0	50.58	0.01	0	6.203	0.002	0.001	24.883	0.006	0.002	31.134	0.031	0.01	0.115	0.032	0.011	53.768	0.165	0.055	3.221	0.153	0.051	-9.933	2.223	0.741	-62.811	2.103	0.701	0.09	0.02	0.007
R133	2016-12-26 13:51 PST	CO2 clumped	OK	FALSE	Veinstrom		Chewbacca	Veinstrom	Calcite	2016-09-07 00:00:00 PDT	90	9	9	-6.15	0	0	-5.22	0.01	0	25.48	0.01	0	-2.37	0.003	0.001	0.404	0.007	0.002	-2.341	0.024	0.008	-0.293	0.025	0.008	0.934	0.133	0.044	0.124	0.134	0.045	-0.828	2.507	0.836	0.906	2.508	0.836	0.008	0.023	0.008
R134	2016-12-27 17:07 PST	CO2 clumped	OK	FALSE	Evap DI+CM H WD 12-21-16		Chewbacca	Heated Gas	CO2	2016-09-07 00:00:00 PDT		9	9	2.09	0	0	13.23	0	0	44.49	0.01	0	5.999	0.003	0.001	18.953	0.005	0.002	24.264	0.022	0.007	-0.655	0.022	0.007	40.633	0.164	0.055	2.28	0.154	0.051	-7.641	1.548	0.516	-49.664	1.479	0.493	0.07	0.014	0.005
R135	2016-12-27 19:14 PST	CO2 clumped	OK	FALSE	ETH-3		Chewbacca	ETH-3-1	Calcite	2016-09-07 00:00:00 PDT	90	9	9	1.7	0	0	5.58	0	0	36.61	0	0	5.367	0.003	0.001	11.268	0.004	0.001	16.437	0.04	0.013	-0.234	0.04	0.013	24.036	0.101	0.034	1.343	0.096	0.032	-4.628	1.737	0.579	-31.843	1.689	0.563	0.042	0.016	0.005
R136	2016-12-28 11:24 PST	CO2 clumped	OK	FALSE	Evap DI+CM 12/21/16 UH WD		Chewbacca	Unheated gas	CO2	2016-09-07 00:00:00 PDT		9	9	1.91	0	0	17.58	0.01	0	48.98	0.01	0	5.977	0.002	0.001	23.324	0.005	0.002	29.295	0.02	0.007	0.059	0.021	0.007	50.447	0.16	0.053	3.109	0.149	0.05	-10.501	1.695	0.565	-60.317	1.605	0.535	0.097	0.016	0.005
R137	2016-12-28 13:34 PST	CO2 clumped	OK	FALSE	TV03		Chewbacca	TV03	Calcite	2016-09-07 00:00:00 PDT	90	9	9	2.6	0	0	-1.07	0	0	29.76	0	0	5.985	0.003	0.001	4.593	0.004	0.001	10.458	0.039	0.013	-0.257	0.04	0.013	9.688	0.144	0.048	0.477	0.142	0.047	-2.392	1.729	0.576	-17.602	1.703	0.568	0.022	0.016	0.005
R138	2016-12-28 21:52 PST	CO2 clumped	OK	FALSE	ETH-2		Chewbacca	ETH-2-1	Calcite	2016-09-07 00:00:00 PDT	90	9	9	-10.15	0	0	-11.41	0.01	0	19.1	0.01	0	-6.334	0.003	0.001	-5.821	0.007	0.002	-12.921	0.041	0.014	-0.71	0.037	0.012	-12.492	0.141	0.047	-0.894	0.151	0.05	2.635	1.449	0.483	21.095	1.472	0.491	-0.024	0.013	0.004
R139	2016-12-30 12:13 PST	CO2 clumped	OK	FALSE	Evap DI+CM H WD 12-21-16		Chewbacca	Heated Gas	CO2	2016-09-07 00:00:00 PDT		9	9	2.39	0	0	16.03	0	0	47.38	0	0	6.38	0.003	0.001	21.77	0.005	0.002	27.537	0.032	0.011	-0.57	0.03	0.01	46.563	0.304	0.101	2.442	0.291	0.097	-9.111	2.015	0.672	-56.587	1.917	0.639	0.082	0.018	0.006
R140	2017-01-03 14:43 PST	CO2 clumped	OK	FALSE	Bonedry + DI UH GJ 11-3-16		Chewbacca	Unheated gas	CO2	2016-09-07 00:00:00 PDT		9	9	-37.31	0	0	10.72	0	0	41.91	0	0	-31.045	0.004	0.001	16.351	0.003	0.001	-16.548	0.027	0.009	-0.069	0.028	0.009	35.251	0.27	0.09	2.209	0.26	0.087	-1.619	1.432	0.477	0.177	1.432	0.477	0.015	0.013	0.004
R141	2017-01-03 16:54 PST	CO2 clumped	OK	FALSE	Carmel Chalk		Chewbacca	Carmel Chalk	Calcite	2016-09-07 00:00:00 PDT	90	9	9	-2.13	0	0	3.41	0	0	34.38	0	0	1.7	0.003	0.001	9.084	0.005	0.002	10.44	0.03	0.01	-0.257	0.029	0.01	19.346	0.173	0.058	1.076	0.171	0.057	-3.135	1.319	0.44	-22.464	1.298	0.433	0.029	0.012	0.004
R142	2017-01-03 19:07 PST	CO2 clumped	OK	FALSE	Veinstrom		Chewbacca	Veinstrom	Calcite	2016-09-07 00:00:00 PDT	90	9	9	-6.16	0	0	-5.23	0	0	25.47	0	0	-2.381	0.002	0.001	0.395	0.004	0.001	-2.37	0.024	0.008	-0.302	0.025	0.008	0.736	0.098	0.033	-0.054	0.103	0.034	0.053	1.455	0.485	1.819	1.457	0.486	0	0.013	0.004
R143	2017-01-03 21:15 PST	CO2 clumped	OK	FALSE	ETH-1		Chewbacca	ETH-1-1	Calcite	2016-09-07 00:00:00 PDT	90	9	9	2.05	0	0	5.18	0	0	36.2	0	0	5.682	0.004	0.001	10.865	0.004	0.001	16.015	0.035	0.012	-0.581	0.035	0.012	23.17	0.115	0.038	1.294	0.11	0.037	-5.388	1.552	0.517	-32.148	1.511	0.504	0.05	0.014	0.005
R144	2017-01-04 12:37 PST	CO2 clumped	OK	FALSE	Evap DI+CM UH WD 12-21-16		Chewbacca	Unheated gas	CO2	2016-09-07 00:00:00 PDT		9	9	1.96	0	0	18.25	0	0	49.67	0	0	6.051	0.003	0.001	23.995	0.004	0.001	30.099	0.03	0.01	0.12	0.029	0.01	52.112	0.207	0.069	3.382	0.198	0.066	-9.378	2.063	0.688	-60.536	1.955	0.652	0.087	0.019	0.006
R145	2017-01-04 23:19 PST	CO2 clumped	OK	FALSE	ETH-3		Chewbacca	ETH-3-1	Calcite	2016-09-07 00:00:00 PDT	90	9	9	1.63	0	0	5.58	0	0	36.61	0	0	5.302	0.002	0.001	11.267	0.003	0.001	16.402	0.024	0.008	-0.201	0.023	0.008	24.207	0.217	0.072	1.513	0.21	0.07	-5.045	1.673	0.558	-32.18	1.624	0.541	0.046	0.015	0.005
R146	2017-01-05 12:37 PST	CO2 clumped	OK	FALSE	Evap DI+CM H WD 12-21-16		Chewbacca	Heated Gas	CO2	2016-09-07 00:00:00 PDT		9	9	2.21	0	0	13.53	0.01	0	44.8	0.01	0	6.119	0.003	0.001	19.254	0.005	0.002	24.725	0.03	0.01	-0.619	0.03	0.01	41.14	0.166	0.055	2.177	0.158	0.053	-8.175	1.756	0.585	-50.848	1.675	0.558	0.074	0.016	0.005
R147	2017-01-05 14:45 PST	CO2 clumped	OK	FALSE	Carmel Chalk		Chewbacca	Carmel Chalk	Calcite	2016-09-07 00:00:00 PDT	90	9	9	-2.16	0	0	3.49	0.01	0	34.46	0.01	0	1.678	0.003	0.001	9.164	0.006	0.002	10.504	0.038	0.013	-0.249	0.034	0.011	19.568	0.17	0.057	1.136	0.16	0.053	-3.341	1.909	0.636	-22.795	1.864	0.621	0.031	0.018	0.006
R148	2017-01-05 23:16 PST	CO2 clumped	OK	FALSE	ETH-2		Chewbacca	ETH-2-1	Calcite	2016-09-07 00:00:00 PDT	90	9	9	-10.11	0	0	-11.2	0.01	0	19.32	0.01	0	-6.287	0.003	0.001	-5.611	0.005	0.002	-12.654	0.037	0.012	-0.695	0.039	0.013	-12.097	0.173	0.058	-0.916	0.18	0.06	4.104	1.722	0.574	22.116	1.753	0.584	-0.038	0.016	0.005
R149	2017-01-06 14:05 PST	CO2 clumped	OK	FALSE	Evap DI+CM H WD 12-21-16		Chewbacca	Heated Gas	CO2	2016-09-07 00:00:00 PDT		9	9	2.26	0	0	16.06	0.01	0	47.42	0.01	0	6.256	0.003	0.001	21.803	0.006	0.002	27.363	0.036	0.012	-0.644	0.033	0.011	46.796	0.21	0.07	2.6	0.203	0.068	-7.46	1.682	0.561	-54.95	1.595	0.532	0.069	0.016	0.005
R150	2017-01-07 01:58 PST	CO2 clumped	OK	FALSE	ETH-1		Chewbacca	ETH-1-1	Calcite	2016-09-07 00:00:00 PDT	90	9	9	1.94	0	0	5.18	0.01	0	36.2	0.01	0	5.577	0.003	0.001	10.87	0.006	0.002	15.938	0.046	0.015	-0.555	0.042	0.014	23.144	0.137	0.046	1.258	0.133	0.044	-3.52	2.084	0.695	-30.232	2.03	0.677	0.032	0.019	0.006
R151	2017-01-07 11:31 PST	CO2 clumped	OK	FALSE	Evap DI+CM UH WD 12-21-16		Chewbacca	Unheated gas	CO2	2016-09-07 00:00:00 PDT		9	9	1.9	0	0	18.57	0.01	0	50.01	0.01	0	6.005	0.003	0.001	24.323	0.006	0.002	30.322	0.033	0.011	0.068	0.033	0.011	52.55	0.225	0.075	3.158	0.214	0.071	-9.18	1.953	0.651	-60.893	1.846	0.615	0.084	0.018	0.006
R152	2017-01-10 16:04 PST	CO2 clumped	OK	FALSE	Carrera Marble		Chewbacca	Carrara Marble	Calcite	2016-09-07 00:00:00 PDT	90	9	9	2.29	0	0	5.76	0.01	0	36.79	0.01	0	5.927	0.003	0.001	11.447	0.006	0.002	16.934	0.04	0.013	-0.495	0.041	0.014	24.305	0.121	0.04	1.25	0.127	0.042	-4.513	1.765	0.588	-32.644	1.715	0.572	0.041	0.016	0.005
R153	2017-01-10 18:09 PST	CO2 clumped	OK	FALSE	TV03		Chewbacca	TV03	Calcite	2016-09-07 00:00:00 PDT	90	9	9	2.64	0	0	-0.89	0.01	0	29.94	0.01	0	6.022	0.002	0.001	4.768	0.006	0.002	10.671	0.06	0.02	-0.256	0.065	0.022	10.06	0.209	0.07	0.496	0.213	0.071	-2.319	0.938	0.313	-17.905	0.926	0.309	0.021	0.008	0.003
R154	2017-01-10 20:17 PST	CO2 clumped	OK	FALSE	ETH-1		Chewbacca	ETH-1-1	Calcite	2016-09-07 00:00:00 PDT	90	9	9	2.04	0	0	5.31	0	0	36.33	0	0	5.682	0.002	0.001	10.995	0.005	0.002	16.158	0.032	0.011	-0.566	0.034	0.011	42.64	6.069	2.023	20.086	5.941	1.98	-8.003	3.088	1.029	-34.936	3.003	1.001	0.072	0.028	0.009
R155	2017-01-10 22:25 PST	CO2 clumped	OK	FALSE	Carmel Chalk		Chewbacca	Carmel Chalk	Calcite	2016-09-07 00:00:00 PDT	90	9	9	-2.24	0	0	3.42	0	0	34.39	0.01	0	1.594	0.001	0	9.096	0.005	0.002	10.327	0.025	0.008	-0.272	0.024	0.008	21.418	0.479	0.16	3.087	0.476	0.159	-3.326	1.98	0.66	-22.564	1.939	0.646	0.03	0.018	0.006
R156	2017-01-11 00:35 PST	CO2 clumped	OK	FALSE	ETH-2		Chewbacca	ETH-2-1	Calcite	2016-09-07 00:00:00 PDT	90	9	9	-10.19	0	0	-11.34	0.01	0	19.17	0.01	0	-6.372	0.003	0.001	-5.751	0.007	0.002	-12.874	0.053	0.018	-0.693	0.054	0.018	-11.914	0.239	0.08	-0.451	0.245	0.082	2.464	2.143	0.714	20.82	2.177	0.726	-0.022	0.019	0.006
R157	2017-01-11 11:41 PST	CO2 clumped	OK	FALSE	Bonedry + DI H GJ 12-2-16		Chewbacca	Heated Gas	CO2	2016-09-07 00:00:00 PDT		9	9	-37.45	0	0	7.24	0.01	0	38.32	0.01	0	-31.3	0.004	0.001	12.853	0.006	0.002	-20.892	0.05	0.017	-0.836	0.049	0.016	27.382	0.158	0.053	1.473	0.161	0.054	1.438	2.84	0.947	10.338	2.864	0.955	-0.013	0.026	0.009
R158	2017-01-11 13:48 PST	CO2 clumped	OK	FALSE	ETH-3		Chewbacca	ETH-3-1	Calcite	2016-09-07 00:00:00 PDT	90	9	9	1.61	0	0	5.48	0.01	0	36.51	0.01	0	5.281	0.003	0.001	11.172	0.006	0.002	16.294	0.048	0.016	-0.194	0.046	0.015	23.961	0.221	0.074	1.46	0.222	0.074	-4.991	1.444	0.481	-31.928	1.401	0.467	0.046	0.013	0.004
R159	2017-01-11 22:17 PST	CO2 clumped	OK	FALSE	TV03		Chewbacca	TV03	Calcite	2016-09-07 00:00:00 PDT	90	9	9	2.43	0	0	-1.15	0.01	0	29.67	0.01	0	5.82	0.002	0.001	4.509	0.005	0.002	10.245	0.039	0.013	-0.217	0.042	0.014	9.603	0.211	0.07	0.56	0.206	0.069	-7.482	2.128	0.709	-22.282	2.101	0.7	0.069	0.02	0.007
R160	2017-01-12 10:20 PST	CO2 clumped	OK	FALSE	Bonedry + DI UH DU 11-3-16		Chewbacca	Unheated gas	CO2	2016-09-07 00:00:00 PDT		9	9	-37.27	0	0	10.31	0.01	0	41.49	0.01	0	-31.024	0.004	0.001	15.944	0.009	0.003	-16.924	0.031	0.01	-0.079	0.034	0.011	34.559	0.204	0.068	2.342	0.195	0.065	-6.868	1.958	0.653	-4.321	1.955	0.652	0.063	0.018	0.006
R161	2017-01-12 12:31 PST	CO2 clumped	OK	FALSE	Carrera Marble		Chewbacca	Carrara Marble	Calcite	2016-09-07 00:00:00 PDT	90	9	9	2.27	0	0	5.77	0.01	0	36.8	0.01	0	5.912	0.003	0.001	11.457	0.006	0.002	16.983	0.033	0.011	-0.441	0.028	0.009	24.692	0.172	0.057	1.61	0.176	0.059	-9.717	1.36	0.453	-37.703	1.313	0.438	0.089	0.013	0.004
R162	2017-01-12 21:04 PST	CO2 clumped	OK	FALSE	ETH-4		Chewbacca	ETH-4-1	Calcite	2016-09-07 00:00:00 PDT	90	9	9	-10.19	0	0	-11.39	0.01	0	19.12	0.01	0	-6.368	0.002	0.001	-5.805	0.007	0.002	-12.731	0.032	0.011	-0.498	0.028	0.009	-2.662	2.151	0.717	9.019	2.186	0.729	0.439	1.443	0.481	18.863	1.459	0.486	-0.004	0.013	0.004
R163	2017-01-13 15:12 PST	CO2 clumped	OK	FALSE	Bonedry + DI UH GJ 11-3-16		Chewbacca	Unheated gas	CO2	2016-09-07 00:00:00 PDT		9	9	-38	0	0	9.84	0.01	0	41.01	0.01	0	-31.725	0.004	0.001	15.467	0.005	0.002	-18.149	0.041	0.014	-0.118	0.04	0.013	33.06	0.201	0.067	1.83	0.187	0.062	-1.257	2.215	0.738	3.003	2.224	0.741	0.012	0.021	0.007
R164	2017-01-13 19:34 PST	CO2 clumped	OK	FALSE	TV03		Chewbacca	TV03	Calcite	2016-09-07 00:00:00 PDT	90	9	9	2.37	0	0	-1.28	0.01	0	29.54	0.01	0	5.763	0.002	0.001	4.38	0.006	0.002	10.044	0.05	0.017	-0.231	0.051	0.017	9.216	0.146	0.049	0.434	0.145	0.048	-3.127	1.38	0.46	-17.685	1.357	0.452	0.029	0.013	0.004
R165	2017-01-14 13:34 PST	CO2 clumped	OK	FALSE	Evap DI+CM UH WD 12-21-16		Chewbacca	Unheated gas	CO2	2016-09-07 00:00:00 PDT		9	9	1.91	0	0	17.48	0.01	0	48.88	0.01	0	5.974	0.002	0.001	23.231	0.005	0.002	29.19	0.027	0.009	0.049	0.025	0.008	50.201	0.244	0.081	3.057	0.231	0.077	-10.887	1.552	0.517	-60.514	1.477	0.492	0.103	0.015	0.005
R166	2017-01-14 15:45 PST	CO2 clumped	OK	FALSE	Carrera Marble		Chewbacca	Carrara Marble	Calcite	2016-09-07 00:00:00 PDT	90	9	9	2.06	0	0	5.96	0	0	37.01	0	0	5.723	0.003	0.001	11.655	0.004	0.001	16.973	0.035	0.012	-0.45	0.033	0.011	24.81	0.196	0.065	1.332	0.188	0.063	-5.296	1.231	0.41	-33.586	1.197	0.399	0.05	0.012	0.004
R167	2017-01-14 17:52 PST	CO2 clumped	OK	FALSE	Carmel Chalk		Chewbacca	Carmel Chalk	Calcite	2016-09-07 00:00:00 PDT	90	9	9	-2.17	0	0	3.41	0	0	34.38	0	0	1.66	0.002	0.001	9.082	0.003	0.001	10.388	0.027	0.009	-0.266	0.028	0.009	19.43	0.285	0.095	1.161	0.276	0.092	-3.647	2.253	0.751	-22.921	2.212	0.737	0.034	0.021	0.007
R168	2017-01-14 19:58 PST	CO2 clumped	OK	FALSE	Veinstrom		Chewbacca	Veinstrom	Calcite	2016-09-07 00:00:00 PDT	90	9	9	-6.13	0	0	-5.14	0	0	25.56	0	0	-2.344	0.003	0.001	0.484	0.003	0.001	-2.231	0.026	0.009	-0.288	0.025	0.008	0.909	0.207	0.069	-0.059	0.21	0.07	0.424	1.735	0.578	1.977	1.739	0.58	-0.004	0.016	0.005
R169	2017-01-17 22:37 PST	CO2 clumped	OK	FALSE	ETH-3		Chewbacca	ETH-3-1	Calcite	2016-09-07 00:00:00 PDT	90	9	9	1.58	0	0	5.46	0	0	36.49	0	0	5.249	0.003	0.001	11.151	0.003	0.001	16.239	0.041	0.014	-0.196	0.041	0.014	25.127	0.698	0.233	2.641	0.681	0.227	-4.356	1.333	0.444	-31.238	1.297	0.432	0.04	0.012	0.004
R170	2017-01-18 12:41 PST	CO2 clumped	OK	FALSE	Bonedry + DI UH GJ 12-2-16		Chewbacca	Unheated gas	CO2	2016-09-07 00:00:00 PDT		9	9	-37.57	0	0	10.54	0	0	41.72	0	0	-31.296	0.004	0.001	16.167	0.003	0.001	-17.032	0.023	0.008	-0.115	0.024	0.008	34.82	0.225	0.075	2.154	0.218	0.073	0.812	1.951	0.65	3.247	1.953	0.651	-0.008	0.019	0.006
R171	2017-03-04 13:31 PST	CO2 clumped	OK	FALSE	Bone Dry DI H ND 1/4		Chewbacca	Heated Gas	CO2	2017-03-03 00:00:00 PST		9	9	-37.44	0	0	5.25	0.01	0	36.27	0.01	0	-31.376	0.004	0.001	16.549	0.006	0.002	-17.503	0.038	0.013	-0.883	0.041	0.014	32.278	0.201	0.067	-1.058	0.196	0.065	121.262	3.076	1.025	123.248	3.075	1.025	-1.109	0.028	0.009
R172	2017-03-04 15:44 PST	CO2 clumped	OK	FALSE	ETH-4		Chewbacca	ETH-4-1	Calcite	2017-03-03 00:00:00 PST	90	9	9	-10.17	0	0	-11.32	0	0	19.19	0	0	-6.369	0.002	0.001	-0.133	0.003	0.001	-7.185	0.028	0.009	-0.489	0.027	0.009	-1.794	0.179	0.06	-1.529	0.177	0.059	121.869	1.496	0.499	129.827	1.506	0.502	-1.104	0.013	0.004
R173	2017-03-05 14:25 PST	CO2 clumped	OK	FALSE	Evap DI + CM H GJ 2/24/2017		Chewbacca	Heated Gas	CO2	2017-03-03 00:00:00 PST		9	9	-37.78	0	0	-3.23	0	0	27.53	0	0	-31.993	0.004	0.001	7.987	0.005	0.002	-26.287	0.042	0.014	-0.895	0.043	0.014	14.877	0.166	0.055	-1.143	0.157	0.052	120.989	2.019	0.673	142.558	2.057	0.686	-1.111	0.019	0.006
R174	2017-03-05 16:31 PST	CO2 clumped	OK	FALSE	TV03		Chewbacca	TV03	Calcite	2017-03-03 00:00:00 PST	90	9	9	2.53	0	0	-0.88	0.01	0	29.96	0.01	0	5.903	0.003	0.001	10.446	0.006	0.002	16.203	0.033	0.011	-0.216	0.03	0.01	20.187	0.237	0.079	-0.797	0.229	0.076	113.238	0.91	0.303	83.915	0.889	0.296	-1.033	0.008	0.003
R175	2017-03-05 22:54 PST	CO2 clumped	OK	FALSE	Veinstrom		Chewbacca	Veinstrom	Calcite	2017-03-03 00:00:00 PST	90	9	9	-6.1	0	0	-5.03	0	0	25.67	0	0	-2.334	0.003	0.001	6.231	0.004	0.001	3.44	0.041	0.014	-0.263	0.04	0.013	13.475	0.937	0.312	0.961	0.924	0.308	123.213	3.69	1.23	112.351	3.654	1.218	-1.092	0.018	0.006
R176	2017-03-06 13:04 PST	CO2 clumped	OK	FALSE	BonedryDI H ND 1/24/2017		Chewbacca	Heated Gas	CO2	2017-03-03 00:00:00 PST		9	9	-37.89	0.01	0	5.22	0.01	0	36.24	0.01	0	-31.799	0.005	0.002	16.521	0.005	0.002	-17.999	0.044	0.015	-0.909	0.046	0.015	30.684	0.742	0.247	-2.546	0.724	0.241	128.672	3.618	1.206	131.261	3.627	1.209	-1.089	0.018	0.006
R177	2017-03-06 15:10 PST	CO2 clumped	OK	FALSE	Carrara Marble		Chewbacca	Carrara Marble	Calcite	2017-03-03 00:00:00 PST	90	9	9	1.96	0	0	5.88	0	0	36.92	0	0	5.603	0.002	0.001	17.274	0.003	0.001	22.365	0.059	0.02	-0.484	0.058	0.019	32.261	0.34	0.113	-2.499	0.333	0.111	116.456	3.301	1.1	73.097	3.17	1.057	-1.009	0.025	0.008
R178	2017-03-07 13:31 PST	CO2 clumped	OK	FALSE	ETH-2		Chewbacca	ETH-2-1	Calcite	2017-03-03 00:00:00 PST	90	9	9	-10.17	0	0	-11.28	0	0	19.23	0.01	0	-6.369	0.002	0.001	-0.095	0.005	0.002	-7.39	0.028	0.009	-0.732	0.032	0.011	-1.787	0.22	0.073	-1.597	0.221	0.074	117.913	3.288	1.096	125.762	3.318	1.106	-1.066	0.026	0.009
R179	2017-03-07 21:56 PST	CO2 clumped	OK	FALSE	ETH-3		Chewbacca	ETH-3-1	Calcite	2017-03-03 00:00:00 PST	90	9	9	1.72	0	0	5.9	0	0	36.94	0	0	5.375	0.003	0.001	17.287	0.005	0.002	22.433	0.053	0.018	-0.196	0.054	0.018	33.892	0.222	0.074	-0.948	0.217	0.072	110.433	1.95	0.65	67.54	1.871	0.624	-0.987	0.016	0.005
R180	2017-03-08 12:46 PST	CO2 clumped	OK	FALSE	BonedryDI H DU		Chewbacca	Heated Gas	CO2	2017-03-03 00:00:00 PST		9	9	-37.18	0.01	0	-4.9	0	0	25.81	0	0	-31.482	0.005	0.002	6.297	0.004	0.001	-27.401	0.037	0.012	-0.936	0.037	0.012	11.25	0.228	0.076	-1.368	0.224	0.075	119.745	2.164	0.721	144.412	2.217	0.739	-1.089	0.016	0.005
R181	2017-03-08 14:57 PST	CO2 clumped	OK	FALSE	ETH-1		Chewbacca	ETH-1-1	Calcite	2017-03-03 00:00:00 PST	90	9	9	2.06	0	0	5.4	0	0	36.43	0.01	0	5.683	0.002	0.001	16.788	0.005	0.002	21.874	0.053	0.018	-0.576	0.051	0.017	33.059	0.182	0.061	-0.772	0.174	0.058	108.318	0.985	0.328	66.187	0.95	0.317	-0.984	0.008	0.003
R182	2017-03-08 23:41 PST	CO2 clumped	OK	FALSE	ETH-4		Chewbacca	ETH-4-1	Calcite	2017-03-03 00:00:00 PST	90	9	9	-10.13	0	0	-11.25	0	0	19.26	0.01	0	-6.337	0.003	0.001	-0.059	0.005	0.002	-7.073	0.049	0.016	-0.482	0.052	0.017	-1.644	0.135	0.045	-1.525	0.137	0.046	112.397	2.062	0.687	120.089	2.08	0.693	-1.035	0.016	0.005
R183	2017-03-09 12:37 PST	CO2 clumped	OK	FALSE	BonedryDI UH DU		Chewbacca	Unheated gas	CO2	2017-03-03 00:00:00 PST		9	9	-38.51	0	0	-2.69	0	0	28.09	0	0	-32.656	0.004	0.001	8.53	0.003	0.001	-25.689	0.029	0.01	-0.103	0.032	0.011	16.631	0.238	0.079	-0.493	0.232	0.077	117.088	2.142	0.714	138.214	2.184	0.728	-1.059	0.015	0.005
R184	2017-03-09 14:48 PST	CO2 clumped	OK	FALSE	Veinstrom		Chewbacca	Veinstrom	Calcite	2017-03-03 00:00:00 PST	90	9	9	-6.22	0	0	-5.26	0	0	25.44	0	0	-2.453	0.003	0.001	5.997	0.005	0.002	3.072	0.031	0.01	-0.279	0.032	0.011	11.028	0.161	0.054	-0.991	0.154	0.051	110.992	2.556	0.852	100.891	2.527	0.842	-1.028	0.022	0.007
R185	2017-03-09 23:07 PST	CO2 clumped	OK	FALSE	TV03		Chewbacca	TV03	Calcite	2017-03-03 00:00:00 PST	90	9	9	2.58	0	0	-0.86	0	0	29.98	0	0	5.952	0.001	0	10.467	0.003	0.001	16.266	0.06	0.02	-0.224	0.059	0.02	20.144	0.123	0.041	-0.882	0.122	0.041	123.403	2.801	0.934	93.712	2.73	0.91	-1.069	0.015	0.005
R186	2017-03-10 13:31 PST	CO2 clumped	OK	FALSE	BonedryDI H DU 2/3/2017		Chewbacca	Heated Gas	CO2	2017-03-03 00:00:00 PST		9	9	-38.29	0	0	-6.25	0	0	24.42	0	0	-32.572	0.004	0.001	4.932	0.003	0.001	-29.837	0.044	0.015	-0.947	0.047	0.016	8.537	0.147	0.049	-1.338	0.147	0.049	121.699	3.306	1.102	150.853	3.394	1.131	-1.115	0.025	0.008
R187	2017-03-10 15:41 PST	CO2 clumped	OK	FALSE	ETH-4		Chewbacca	ETH-4-1	Calcite	2017-03-03 00:00:00 PST	90	9	9	-10.16	0	0	-11.33	0	0	19.18	0	0	-6.363	0.002	0.001	-0.141	0.005	0.002	-7.197	0.032	0.011	-0.499	0.031	0.01	-1.876	0.171	0.057	-1.594	0.167	0.056	116.816	2.098	0.699	124.75	2.113	0.704	-1.073	0.018	0.006
R188	2017-03-11 14:26 PST	CO2 clumped	OK	FALSE	Evap DI + CM UH DU 3.10.17		Chewbacca	Unheated gas	CO2	2017-03-03 00:00:00 PST		9	9	2.16	0	0	19.66	0	0	51.13	0	0	6.26	0.002	0.001	31.194	0.002	0.001	37.479	0.028	0.009	0.155	0.027	0.009	64.502	0.305	0.102	1.074	0.291	0.097	98.61	2.387	0.796	27.402	2.232	0.744	-0.922	0.021	0.007
R189	2017-03-11 16:31 PST	CO2 clumped	OK	FALSE	Carrera Marble		Chewbacca	Carrara Marble	Calcite	2017-03-03 00:00:00 PST	90	9	9	2.06	0	0	6.13	0	0	37.18	0	0	5.707	0.002	0.001	17.521	0.003	0.001	22.75	0.04	0.013	-0.453	0.043	0.014	35.399	0.141	0.047	0.049	0.136	0.045	105.679	2.023	0.674	62.116	1.947	0.649	-0.97	0.017	0.006
R190	2017-03-12 01:17 PST	CO2 clumped	OK	FALSE	Carmel Chalk		Chewbacca	Carmel Chalk	Calcite	2017-03-03 00:00:00 PST	90	9	9	-2.21	0	0	3.63	0	0	34.6	0	0	1.612	0.003	0.001	14.989	0.003	0.001	16.172	0.051	0.017	-0.247	0.048	0.016	30.175	0.173	0.058	-0.026	0.171	0.057	109.137	1.526	0.509	75.332	1.479	0.493	-0.993	0.013	0.004
R191	2017-03-13 10:42 PDT	CO2 clumped	OK	FALSE	Bonedry + DI H ND		Chewbacca	Heated Gas	CO2	2017-03-03 00:00:00 PST		9	9	-37.41	0	0	4.74	0.01	0	35.75	0.01	0	-31.365	0.004	0.001	16.036	0.005	0.002	-17.983	0.038	0.013	-0.888	0.04	0.013	30.892	0.494	0.165	-1.393	0.478	0.159	126.155	4.505	1.502	129.254	4.516	1.505	-1.104	0.027	0.009
R192	2017-03-13 13:32 PDT	CO2 clumped	OK	FALSE	Veinstrom		Chewbacca	Veinstrom	Calcite	2017-03-03 00:00:00 PST	90	9	9	-6.06	0	0	-4.99	0.01	0	25.72	0.01	0	-2.294	0.002	0.001	6.273	0.007	0.002	3.538	0.037	0.012	-0.248	0.036	0.012	11.696	0.18	0.06	-0.879	0.166	0.055	114.171	2.688	0.896	103.259	2.669	0.89	-1.038	0.021	0.007
R193	2017-03-13 21:52 PDT	CO2 clumped	OK	FALSE	TV03		Chewbacca	TV03	Calcite	2017-03-03 00:00:00 PST	90	9	9	2.68	0	0	-0.66	0	0	30.18	0	0	6.047	0.002	0.001	10.667	0.004	0.001	16.565	0.053	0.018	-0.223	0.055	0.018	20.785	0.192	0.064	-0.649	0.186	0.062	124.654	4.003	1.334	94.392	3.895	1.298	-1.07	0.02	0.007
R194	2017-03-14 14:29 PDT	CO2 clumped	OK	FALSE	Carmel Chalk		Chewbacca	Carmel Chalk	Calcite	2017-03-03 00:00:00 PST	90	9	9	-2.13	0	0	3.67	0	0	34.64	0	0	1.688	0.003	0.001	15.029	0.004	0.001	16.319	0.033	0.011	-0.219	0.03	0.01	30.259	0.148	0.049	-0.024	0.149	0.05	107.133	2.331	0.777	73.218	2.258	0.753	-1	0.02	0.007
R195	2017-03-14 20:58 PDT	CO2 clumped	OK	FALSE	Carrara Marble		Chewbacca	Carrara Marble	Calcite	2017-03-03 00:00:00 PST	90	9	9	2.1	0	0	6.19	0	0	37.24	0	0	5.739	0.003	0.001	17.587	0.004	0.001	22.815	0.064	0.021	-0.487	0.06	0.02	35.475	0.221	0.074	-0.008	0.21	0.07	122.303	3.844	1.281	77.909	3.694	1.231	-1.042	0.011	0.004
R196	2017-03-15 13:31 PDT	CO2 clumped	OK	FALSE	Bonedry DI UH WD 3.13.17		Chewbacca	Unheated gas	CO2	2017-03-03 00:00:00 PST		9	9	-37.55	0	0	10.86	0	0	42.05	0	0	-31.286	0.002	0.001	22.215	0.003	0.001	-11.273	0.036	0.012	-0.119	0.039	0.013	45.826	0.244	0.081	0.863	0.235	0.078	110.692	2.792	0.931	100.473	2.767	0.922	-1.027	0.024	0.008
R197	2017-03-15 15:38 PDT	CO2 clumped	OK	FALSE	Veinstrom		Chewbacca	Veinstrom	Calcite	2017-03-03 00:00:00 PST	90	9	9	-6.14	0	0	-5.04	0.01	0	25.66	0.01	0	-2.372	0.004	0.001	6.219	0.005	0.002	3.372	0.035	0.012	-0.279	0.033	0.011	11.668	0.131	0.044	-0.799	0.136	0.045	110.861	2.672	0.891	100.189	2.651	0.884	-1.028	0.024	0.008
R198	2017-03-16 00:32 PDT	CO2 clumped	OK	FALSE	TV03		Chewbacca	TV03	Calcite	2017-03-03 00:00:00 PST	90	9	9	2.63	0	0	-0.71	0.01	0	30.13	0.01	0	6.001	0.003	0.001	10.613	0.006	0.002	16.467	0.042	0.014	-0.218	0.044	0.015	20.715	0.12	0.04	-0.609	0.12	0.04	122.968	2.372	0.791	92.922	2.309	0.77	-1.076	0.016	0.005
R199	2017-03-16 12:17 PDT	CO2 clumped	OK	FALSE	Evap DI + CM UH GJ 3.10.17		Chewbacca	Unheated gas	CO2	2017-03-03 00:00:00 PST		9	9	1.59	0	0	18.62	0	0	50.05	0	0	5.697	0.003	0.001	30.141	0.004	0.001	35.881	0.025	0.008	0.195	0.026	0.009	62.872	0.346	0.115	1.586	0.331	0.11	110.794	2.877	0.959	41.506	2.695	0.898	-1.017	0.02	0.007
R200	2017-03-16 14:28 PDT	CO2 clumped	OK	FALSE	ETH-2		Chewbacca	ETH-2-1	Calcite	2017-03-03 00:00:00 PST	90	9	9	-10.13	0	0	-11.23	0	0	19.28	0	0	-6.332	0.003	0.001	-0.042	0.004	0.001	-7.282	0.029	0.01	-0.714	0.032	0.011	-0.988	0.181	0.06	-0.904	0.18	0.06	122.202	1.923	0.641	129.917	1.938	0.646	-1.108	0.017	0.006
R201	2017-03-16 22:55 PDT	CO2 clumped	OK	FALSE	ETH-3		Chewbacca	ETH-3-1	Calcite	2017-03-03 00:00:00 PST	90	9	9	1.77	0	0	5.86	0	0	36.9	0	0	5.422	0.002	0.001	17.25	0.004	0.001	22.462	0.067	0.022	-0.18	0.064	0.021	34.78	0.284	0.095	-0.016	0.276	0.092	127.127	3.512	1.171	83.613	3.378	1.126	-1.089	0.017	0.006
R202	2017-03-18 14:07 PDT	CO2 clumped	OK	FALSE	Bonedry + DI H 12/5 CW		Chewbacca	Heated Gas	CO2	2017-03-03 00:00:00 PST		9	9	-37.41	0	0	2.17	0.01	0	33.1	0.01	0	-31.455	0.004	0.001	13.439	0.006	0.002	-20.526	0.03	0.01	-0.871	0.032	0.011	26.396	0.325	0.108	-0.646	0.321	0.107	125.802	2.952	0.984	134.701	2.976	0.992	-1.136	0.026	0.009
R203	2017-03-18 16:23 PDT	CO2 clumped	OK	FALSE	ETH-1		Chewbacca	ETH-1-1	Calcite	2017-03-03 00:00:00 PST	90	9	9	2.05	0	0	5.39	0	0	36.42	0	0	5.671	0.003	0.001	16.78	0.002	0.001	21.871	0.034	0.011	-0.56	0.032	0.011	33.821	0.187	0.062	-0.019	0.183	0.061	116.129	2.305	0.768	73.73	2.221	0.74	-1.033	0.019	0.006
R204	2017-03-19 14:58 PDT	CO2 clumped	OK	FALSE	Bonedry DI UH 3/13 WD		Chewbacca	Unheated gas	CO2	2017-03-03 00:00:00 PST		9	9	-37.51	0	0	10.85	0	0	42.05	0	0	-31.249	0.003	0.001	22.212	0.004	0.001	-11.23	0.053	0.018	-0.112	0.054	0.018	45.664	0.18	0.06	0.714	0.177	0.059	115.425	2.151	0.717	105.124	2.128	0.709	-1.053	0.02	0.007
R205	2017-03-20 13:27 PDT	CO2 clumped	OK	FALSE	Evap DI+CM H GJ 3/10/17		Chewbacca	Heated Gas	CO2	2017-03-03 00:00:00 PST		9	9	3.5	0	0	20.13	0	0	51.61	0	0	7.535	0.003	0.001	31.67	0.003	0.001	38.49	0.037	0.012	-0.63	0.034	0.011	65.383	0.27	0.09	0.977	0.255	0.085	123.157	2.837	0.946	47.99	2.648	0.883	-1.1	0.024	0.008
R206	2017-03-20 15:31 PDT	CO2 clumped	OK	FALSE	Carrera Marble		Chewbacca	Carrara Marble	Calcite	2017-03-03 00:00:00 PST	90	9	9	2.01	0	0	5.91	0.01	0	36.95	0.01	0	5.65	0.004	0.001	17.3	0.005	0.002	22.453	0.034	0.011	-0.471	0.033	0.011	35.066	0.17	0.057	0.161	0.158	0.053	123.675	2.006	0.669	79.929	1.922	0.641	-1.118	0.016	0.005
R207	2017-03-20 21:58 PDT	CO2 clumped	OK	FALSE	Carmel Chalk		Chewbacca	Carmel Chalk	Calcite	2017-03-03 00:00:00 PST	90	9	9	-2.21	0	0	3.49	0.01	0	34.46	0.01	0	1.605	0.004	0.001	14.849	0.005	0.002	16.05	0.026	0.009	-0.225	0.029	0.01	29.732	0.108	0.036	-0.181	0.102	0.034	137.027	3.088	1.029	102.678	2.99	0.997	-1.176	0.014	0.005
R208	2017-03-21 15:02 PDT	CO2 clumped	OK	FALSE	TV03		Chewbacca	TV03	Calcite	2017-03-03 00:00:00 PST	90	9	9	2.71	0	0	-0.68	0	0	30.15	0	0	6.079	0.002	0.001	10.641	0.004	0.001	16.588	0.041	0.014	-0.207	0.041	0.014	20.983	0.217	0.072	-0.404	0.214	0.071	119.672	2.648	0.883	89.564	2.581	0.86	-1.08	0.019	0.006
R209	2017-03-21 21:28 PDT	CO2 clumped	OK	FALSE	ETH 4		Chewbacca	ETH-4-1	Calcite	2017-03-03 00:00:00 PST	90	9	9	-10.12	0	0	-11.22	0	0	19.29	0	0	-6.319	0.002	0.001	-0.034	0.004	0.001	-7.034	0.041	0.014	-0.485	0.044	0.015	-1.884	0.132	0.044	-1.815	0.135	0.045	137.548	4.953	1.651	145.336	4.988	1.663	-1.16	0.024	0.008
R210	2017-03-22 12:07 PDT	CO2 clumped	OK	FALSE	Bonedry DI UH WD 3.13.17		Chewbacca	Unheated gas	CO2	2017-03-03 00:00:00 PST		9	9	-37.49	0	0	10.37	0	0	41.54	0	0	-31.248	0.003	0.001	21.719	0.005	0.002	-11.662	0.044	0.015	-0.075	0.043	0.014	45.074	0.266	0.089	1.115	0.25	0.083	115.603	2.852	0.951	106.348	2.833	0.944	-1.049	0.021	0.007
R211	2017-03-22 14:19 PDT	CO2 clumped	OK	FALSE	ETH-2		Chewbacca	ETH-2-1	Calcite	2017-03-03 00:00:00 PST	90	9	9	-10.14	0	0	-11.08	0.01	0	19.44	0.01	0	-6.334	0.004	0.001	0.109	0.006	0.002	-7.128	0.034	0.011	-0.705	0.034	0.011	-1.464	0.137	0.046	-1.682	0.139	0.046	120.316	1.598	0.533	127.686	1.613	0.538	-1.085	0.013	0.004
R212	2017-03-23 15:58 PDT	CO2 clumped	OK	FALSE	Bonedry DI H CW 12.5.16		Chewbacca	Heated Gas	CO2	2017-03-03 00:00:00 PST		9	9	-37.34	0	0	2.38	0	0	33.31	0	0	-31.385	0.004	0.001	13.647	0.004	0.001	-20.284	0.031	0.01	-0.9	0.031	0.01	27.293	0.182	0.061	-0.183	0.173	0.058	120.267	3.18	1.06	128.579	3.21	1.07	-1.114	0.024	0.008
R213	2017-03-24 12:30 PDT	CO2 clumped	OK	FALSE	Evap DI+CM UH DU 3/23/17		Chewbacca	Unheated gas	CO2	2017-03-03 00:00:00 PST		9	9	1.09	0	0	7.95	0	0	39.05	0	0	4.855	0.002	0.001	19.357	0.004	0.001	24.27	0.038	0.013	0.134	0.037	0.012	39.705	0.192	0.064	0.593	0.184	0.061	115.123	4.028	1.343	68.363	3.856	1.285	-1.07	0.027	0.009
R214	2017-03-24 14:36 PDT	CO2 clumped	OK	FALSE	ETH-1		Chewbacca	ETH-1-1	Calcite	2017-03-03 00:00:00 PST	90	9	9	2	0	0	5.28	0	0	36.3	0	0	5.618	0.003	0.001	16.666	0.003	0.001	21.701	0.041	0.014	-0.56	0.038	0.013	33.855	0.278	0.093	0.238	0.268	0.089	116.385	1.648	0.549	74.274	1.583	0.528	-1.068	0.013	0.004
R215	2017-03-24 21:11 PDT	CO2 clumped	OK	FALSE	Carrera Marble		Chewbacca	Carrara Marble	Calcite	2017-03-03 00:00:00 PST	90	9	9	2.05	0	0	6.14	0.01	0	37.19	0.01	0	5.699	0.002	0.001	17.532	0.006	0.002	22.739	0.033	0.011	-0.466	0.032	0.011	35.697	0.254	0.085	0.314	0.249	0.083	125.227	5.182	1.727	80.879	4.971	1.657	-1.065	0.026	0.009
R216	2017-03-25 16:24 PDT	CO2 clumped	OK	FALSE	Evap DI+CM H DU 3/23/17		Chewbacca	Heated Gas	CO2	2017-03-03 00:00:00 PST		9	9	1.38	0	0	5.85	0	0	36.89	0	0	5.053	0.003	0.001	17.239	0.002	0.001	21.515	0.058	0.019	-0.717	0.058	0.019	34.871	0.257	0.086	0.092	0.247	0.082	114.968	3.744	1.248	72.364	3.6	1.2	-1.057	0.03	0.01
R217	2017-03-25 18:31 PDT	CO2 clumped	OK	FALSE	ETH-4		Chewbacca	ETH-4-1	Calcite	2017-03-03 00:00:00 PST	90	9	9	-10.14	0	0	-11.27	0.01	0	19.24	0.01	0	-6.339	0.003	0.001	-0.08	0.006	0.002	-7.118	0.037	0.012	-0.504	0.036	0.012	-1.882	0.236	0.079	-1.721	0.233	0.078	120.181	2.439	0.813	127.975	2.463	0.821	-1.117	0.021	0.007
R218	2017-03-26 13:27 PDT	CO2 clumped	OK	FALSE	Veinstrom		Chewbacca	Veinstrom	Calcite	2017-03-03 00:00:00 PST	90	9	9	-6.07	0	0	-4.93	0	0	25.78	0	0	-2.303	0.002	0.001	6.335	0.004	0.001	3.586	0.044	0.015	-0.251	0.043	0.014	11.93	0.265	0.088	-0.77	0.26	0.087	115.651	2.232	0.744	104.602	2.215	0.738	-1.078	0.018	0.006
R219	2017-03-27 12:44 PDT	CO2 clumped	OK	FALSE	Bonedry DI UH NH 3/24/17		Chewbacca	Unheated gas	CO2	2017-03-03 00:00:00 PST		9	9	-37.37	0	0	10.36	0	0	41.54	0	0	-31.133	0.003	0.001	21.709	0.004	0.001	-11.518	0.041	0.014	-0.044	0.041	0.014	45.017	0.172	0.057	1.079	0.168	0.056	109.415	1.783	0.594	100.091	1.77	0.59	-1.037	0.014	0.005
R220	2017-03-27 14:50 PDT	CO2 clumped	OK	FALSE	TV03		Chewbacca	TV03	Calcite	2017-03-03 00:00:00 PST	90	9	9	2.7	0	0	-0.77	0	0	30.06	0	0	6.062	0.002	0.001	10.552	0.004	0.001	16.489	0.045	0.015	-0.201	0.048	0.016	20.9	0.198	0.066	-0.309	0.198	0.066	107.011	1.603	0.534	77.448	1.556	0.519	-1	0.014	0.005
R221	2017-03-27 21:07 PDT	CO2 clumped	OK	FALSE	Carmel Chalk		Chewbacca	Carmel Chalk	Calcite	2017-03-03 00:00:00 PST	90	9	9	-2.16	0	0	3.62	0	0	34.59	0	0	1.658	0.004	0.001	14.98	0.004	0.001	16.199	0.064	0.021	-0.259	0.062	0.021	30.273	0.215	0.072	0.087	0.208	0.069	116.974	3.842	1.281	82.896	3.72	1.24	-1.027	0.016	0.005
R222	2017-03-28 12:55 PDT	CO2 clumped	OK	FALSE	Evap DI+CM UH DU 3/23/17		Chewbacca	Unheated gas	CO2	2017-03-03 00:00:00 PST		9	9	1.31	0	0	8.4	0	0	39.52	0	0	5.077	0.002	0.001	19.816	0.004	0.001	24.933	0.043	0.014	0.11	0.041	0.014	41.063	0.223	0.074	0.998	0.214	0.071	104.204	2.131	0.71	56.718	2.032	0.677	-0.992	0.017	0.006
R223	2017-03-28 15:05 PDT	CO2 clumped	OK	FALSE	ETH-2		Chewbacca	ETH-2-1	Calcite	2017-03-03 00:00:00 PST	90	9	9	-10.1	0	0	-11.26	0.01	0	19.25	0.01	0	-6.308	0.003	0.001	-0.071	0.006	0.002	-7.252	0.038	0.013	-0.681	0.041	0.014	-1.879	0.17	0.057	-1.737	0.171	0.057	111.771	1.879	0.626	119.448	1.889	0.63	-1.044	0.016	0.005
R224	2017-03-29 15:57 PDT	CO2 clumped	OK	FALSE	ETH-1		Chewbacca	ETH-1-1	Calcite	2017-03-03 00:00:00 PST	90	9	9	2.02	0	0	5.34	0.01	0	36.37	0.01	0	5.641	0.003	0.001	16.727	0.006	0.002	21.777	0.03	0.01	-0.57	0.028	0.009	34.258	0.097	0.032	0.508	0.097	0.032	100.272	1.683	0.561	58.617	1.624	0.541	-0.945	0.014	0.005
R225	2017-03-30 12:17 PDT	CO2 clumped	OK	FALSE	EVAP DI+CM UH DU 3/23/17		Chewbacca	Unheated gas	CO2	2017-03-03 00:00:00 PST		9	9	1.33	0	0	8.47	0	0	39.59	0	0	5.099	0.003	0.001	19.89	0.003	0.001	25.007	0.045	0.015	0.089	0.044	0.015	41.119	0.149	0.05	0.906	0.143	0.048	107.818	1.548	0.516	60	1.485	0.495	-1.016	0.013	0.004
R226	2017-03-30 14:34 PDT	CO2 clumped	OK	FALSE	Carrera Marble		Chewbacca	Carrara Marble	Calcite	2017-03-03 00:00:00 PST	90	9	9	2.12	0	0	6.21	0.01	0	37.27	0.01	0	5.759	0.002	0.001	17.61	0.005	0.002	22.886	0.026	0.009	-0.459	0.022	0.007	36.021	0.14	0.047	0.473	0.133	0.044	107.942	2.436	0.812	64.047	2.342	0.781	-1.009	0.022	0.007
R227	2017-03-31 10:50 PDT	CO2 clumped	OK	FALSE	Bonedry DI H DU 3-24-17		Chewbacca	Heated Gas	CO2	2017-03-03 00:00:00 PST		9	9	-38.4	0	0	-3.29	0.01	0	27.47	0.01	0	-32.571	0.004	0.001	7.926	0.008	0.003	-27.033	0.017	0.006	-0.986	0.025	0.008	14.963	0.188	0.063	-0.938	0.19	0.063	115.683	3.172	1.057	138.011	3.236	1.079	-1.091	0.023	0.008
R228	2017-04-01 13:18 PDT	CO2 clumped	OK	FALSE	Evap DI+CM H DU 3-23-17		Chewbacca	Heated Gas	CO2	2017-03-03 00:00:00 PST		9	9	1.33	0	0	5.51	0	0	36.54	0	0	4.998	0.003	0.001	16.893	0.004	0.001	21.123	0.029	0.01	-0.71	0.025	0.008	34.351	0.126	0.042	0.27	0.127	0.042	103.094	2.481	0.827	61.715	2.384	0.795	-0.975	0.021	0.007
R229	2017-04-03 13:01 PDT	CO2 clumped	OK	FALSE	Bonedry DI UH DU 3/24/17		Chewbacca	Unheated gas	CO2	2017-03-03 00:00:00 PST		9	9	-38.12	0	0	-1.87	0.01	0	28.93	0.01	0	-32.264	0.003	0.001	9.354	0.005	0.002	-24.538	0.034	0.011	-0.144	0.037	0.012	18.611	0.159	0.053	-0.181	0.159	0.053	112.591	3.844	1.281	131.325	3.914	1.305	-1.064	0.029	0.01
R230	2017-04-03 15:11 PDT	CO2 clumped	OK	FALSE	Veinstrom		Chewbacca	Veinstrom	Calcite	2017-03-03 00:00:00 PST	90	9	9	-6.17	0	0	-5.15	0.01	0	25.55	0.01	0	-2.407	0.003	0.001	6.106	0.006	0.002	3.252	0.042	0.014	-0.252	0.044	0.015	11.475	0.132	0.044	-0.765	0.13	0.043	109.128	2.025	0.675	98.756	2.014	0.671	-1.027	0.018	0.006
R231	2017-04-04 13:16 PDT	CO2 clumped	OK	FALSE	Evap DI+CM UH NH 3/30/17		Chewbacca	Unheated gas	CO2	2017-03-03 00:00:00 PST		9	9	2.05	0	0	-3.27	0	0	27.49	0	0	5.373	0.003	0.001	8.028	0.005	0.002	13.546	0.029	0.01	0.067	0.027	0.009	15.647	0.271	0.09	-0.465	0.263	0.088	106.383	3.721	1.24	82.935	3.642	1.214	-1.004	0.026	0.009
R232	2017-04-05 12:31 PDT	CO2 clumped	OK	FALSE	Bonedry DI H DU 3/24/17		Chewbacca	Heated Gas	CO2	2017-03-03 00:00:00 PST		9	9	-38.6	0	0	-3.33	0	0	27.43	0	0	-32.763	0.004	0.001	7.88	0.002	0.001	-27.237	0.034	0.011	-0.946	0.036	0.012	15.004	0.201	0.067	-0.806	0.198	0.066	120.103	3.892	1.297	142.864	3.977	1.326	-1.12	0.026	0.009
R233	2017-04-05 21:01 PDT	CO2 clumped	OK	FALSE	TV03		Chewbacca	TV03	Calcite	2017-03-03 00:00:00 PST	90	9	9	2.33	0	0	-1.27	0	0	29.55	0	0	5.701	0.003	0.001	10.045	0.004	0.001	15.636	0.044	0.015	-0.177	0.043	0.014	19.92	0.143	0.048	-0.266	0.14	0.047	110.217	2.061	0.687	82.048	2.005	0.668	-1.023	0.018	0.006
R234	2017-04-06 12:53 PDT	CO2 clumped	OK	FALSE	Evap DI+CM UH		Chewbacca	Unheated gas	CO2	2017-03-03 00:00:00 PST		9	9	2.06	0	0	-3.15	0.01	0	27.62	0.01	0	5.382	0.002	0.001	8.152	0.014	0.005	13.682	0.04	0.013	0.069	0.038	0.013	15.892	0.173	0.058	-0.471	0.166	0.055	117.08	3.083	1.028	93.128	3.035	1.012	-1.085	0.028	0.009
R235	2017-04-06 15:08 PDT	CO2 clumped	OK	FALSE	Eth-1		Chewbacca	ETH-1-1	Calcite	2017-03-03 00:00:00 PST	90	9	9	2.08	0	0	5.46	0.01	0	36.49	0.01	0	5.695	0.003	0.001	16.852	0.005	0.002	21.958	0.042	0.014	-0.568	0.043	0.014	34.291	0.171	0.057	0.294	0.168	0.056	115.059	1.265	0.422	72.525	1.215	0.405	-1.063	0.011	0.004
R236	2017-04-06 21:26 PDT	CO2 clumped	OK	FALSE	Eth-2		Chewbacca	ETH-2-1	Calcite	2017-03-03 00:00:00 PST	90	9	9	-10	0	0	-11.05	0.01	0	19.47	0.01	0	-6.201	0.002	0.001	0.143	0.006	0.002	-6.957	0.032	0.011	-0.704	0.03	0.01	-1.403	0.213	0.071	-1.688	0.215	0.072	123.666	2.109	0.703	130.822	2.128	0.709	-1.146	0.017	0.006
R237	2017-04-07 12:17 PDT	CO2 clumped	OK	FALSE	Bonedry DI UH DU 3.24.17		Chewbacca	Unheated gas	CO2	2017-03-03 00:00:00 PST		9	9	-38.17	0	0	-1.56	0.01	0	29.26	0.01	0	-32.296	0.004	0.001	9.674	0.009	0.003	-24.266	0.041	0.014	-0.142	0.039	0.013	19.194	0.214	0.071	-0.244	0.211	0.07	112.83	3	1	130.902	3.058	1.019	-1.032	0.024	0.008
R238	2017-04-07 14:24 PDT	CO2 clumped	OK	FALSE	ETH-3		Chewbacca	ETH-3-1	Calcite	2017-03-03 00:00:00 PST	90	9	9	1.72	0	0	5.74	0.01	0	36.77	0.01	0	5.368	0.003	0.001	17.127	0.007	0.002	22.291	0.029	0.01	-0.174	0.032	0.011	35.37	0.2	0.067	0.795	0.184	0.061	102.384	2.439	0.813	60.136	2.341	0.78	-0.943	0.021	0.007
R239	2017-04-07 21:14 PDT	CO2 clumped	OK	FALSE	ETH-4		Chewbacca	ETH-4-1	Calcite	2017-03-03 00:00:00 PST	90	9	9	-10.09	0	0	-11.02	0.01	0	19.5	0.01	0	-6.286	0.002	0.001	0.174	0.007	0.002	-6.805	0.027	0.009	-0.494	0.031	0.01	-1.151	0.249	0.083	-1.499	0.25	0.083	107.301	1.67	0.557	114.385	1.688	0.563	-1.008	0.015	0.005
R240	2017-04-10 11:57 PDT	CO2 clumped	OK	FALSE	Evap DI+CM UH NH 4.1.17		Chewbacca	Unheated gas	CO2	2017-03-03 00:00:00 PST		9	9	2	0	0	-3.57	0.01	0	27.18	0.01	0	5.308	0.002	0.001	7.728	0.006	0.002	13.178	0.043	0.014	0.062	0.043	0.014	14.902	0.241	0.08	-0.604	0.235	0.078	121.229	5.927	1.976	98.182	5.808	1.936	-1.1	0.027	0.009
R241	2017-04-12 14:26 PDT	CO2 clumped	OK	FALSE	Evap DI+CM H NH 4.1.17		Chewbacca	Heated Gas	CO2	2017-03-03 00:00:00 PST		9	9	2.01	0	0	-5.89	0	0	24.79	0	0	5.236	0.004	0.001	5.377	0.004	0.001	10.012	0.038	0.013	-0.698	0.039	0.013	9.891	0.197	0.066	-0.883	0.19	0.063	115.795	5.178	1.726	97.971	5.099	1.7	-1.046	0.037	0.012
R242	2017-04-13 13:12 PDT	CO2 clumped	OK	FALSE	Bonedry DI H NH 4/7/17		Chewbacca	Heated Gas	CO2	2017-03-03 00:00:00 PST		9	9	-37.6	0.01	0	-7.29	0.01	0	23.35	0.01	0	-31.958	0.007	0.002	3.887	0.005	0.002	-30.158	0.064	0.021	-0.91	0.058	0.019	6.693	0.224	0.075	-1.087	0.226	0.075	118.394	1.533	0.511	149.032	1.587	0.529	-1.097	0.015	0.005
R243	2017-04-14 12:24 PDT	CO2 clumped	OK	FALSE	Bonedry DI UH DU 3/24/17		Chewbacca	Unheated gas	CO2	2017-03-03 00:00:00 PST		9	9	-38.09	0	0	-1.96	0.01	0	28.84	0.01	0	-32.235	0.004	0.001	9.266	0.005	0.002	-24.598	0.03	0.01	-0.151	0.031	0.01	18.284	0.141	0.047	-0.328	0.14	0.047	112.331	1.92	0.64	131.216	1.952	0.651	-1.047	0.018	0.006
R244	2017-04-15 12:49 PDT	CO2 clumped	OK	FALSE	Bonedry DI UH BH 4/7/17		Chewbacca	Unheated gas	CO2	2017-03-03 00:00:00 PST		9	9	2.17	0	0	-2.97	0	0	27.8	0.01	0	5.489	0.002	0.001	8.33	0.005	0.002	13.955	0.047	0.016	0.056	0.047	0.016	16.392	0.219	0.073	-0.332	0.211	0.07	106.01	2.378	0.793	81.799	2.323	0.774	-0.991	0.019	0.006
R245	2017-04-16 13:15 PDT	CO2 clumped	OK	FALSE	Evap DI+CM H NH 3/30/17		Chewbacca	Heated Gas	CO2	2017-03-03 00:00:00 PST		9	9	2.07	0	0	-4.46	0	0	26.26	0	0	5.344	0.003	0.001	6.823	0.004	0.001	11.5	0.051	0.017	-0.749	0.052	0.017	12.628	0.085	0.028	-1.049	0.087	0.029	111.415	2.556	0.852	90.452	2.504	0.835	-1.038	0.017	0.006
R246	2017-04-17 12:19 PDT	CO2 clumped	OK	FALSE	Bonedry DI H NH 3/24/2017		Chewbacca	Heated Gas	CO2	2017-03-03 00:00:00 PST		9	9	-37.51	0	0	7.87	0	0	38.98	0	0	-31.355	0.003	0.001	19.201	0.004	0.001	-14.939	0.038	0.013	-0.859	0.04	0.013	39.558	0.186	0.062	0.758	0.182	0.061	119.035	1.459	0.486	115.272	1.452	0.484	-1.117	0.013	0.004
R247	2017-04-17 23:20 PDT	CO2 clumped	OK	FALSE	ETH-2		Chewbacca	ETH-2-1	Calcite	2017-03-03 00:00:00 PST	90	9	9	-10.02	0	0	-11	0	0	19.52	0.01	0	-6.22	0.002	0.001	0.193	0.005	0.002	-6.941	0.026	0.009	-0.718	0.023	0.008	-0.735	0.116	0.039	-1.121	0.11	0.037	123.104	2.196	0.732	130.166	2.218	0.739	-1.126	0.02	0.007
R248	2017-04-18 14:23 PDT	CO2 clumped	OK	FALSE	Bonedry DI UH NH 4/7/2017		Chewbacca	Unheated gas	CO2	2017-03-03 00:00:00 PST		9	9	-37.5	0	0	-3.78	0	0	26.96	0	0	-31.745	0.004	0.001	7.423	0.003	0.001	-25.875	0.041	0.014	-0.188	0.043	0.014	14.332	0.176	0.059	-0.562	0.175	0.058	118.248	2.48	0.827	140.707	2.531	0.844	-1.104	0.014	0.005
R249	2017-04-18 22:45 PDT	CO2 clumped	OK	FALSE	ETH-4		Chewbacca	ETH-4-1	Calcite	2017-03-03 00:00:00 PST	90	9	9	-10.08	0	0	-11.06	0.01	0	19.46	0.01	0	-6.279	0.001	0	0.133	0.005	0.002	-6.83	0.027	0.009	-0.486	0.027	0.009	-1.538	0.203	0.068	-1.804	0.204	0.068	114.29	2.353	0.784	121.501	2.369	0.79	-1.062	0.02	0.007
R250	2017-04-19 21:59 PDT	CO2 clumped	OK	FALSE	Carmel Chalk		Chewbacca	Carmel Chalk	Calcite	2017-03-03 00:00:00 PST	90	9	9	-2.22	0	0	3.58	0	0	34.55	0	0	1.604	0.001	0	14.942	0.003	0.001	16.172	0.044	0.015	-0.193	0.044	0.015	30.527	0.181	0.06	0.408	0.177	0.059	115.594	1.548	0.516	81.7	1.5	0.5	-1.071	0.014	0.005
R251	2017-04-20 12:11 PDT	CO2 clumped	OK	FALSE	Evap DI+CM H DU 4/17/17		Chewbacca	Heated Gas	CO2	2017-03-03 00:00:00 PST		9	9	1.77	0	0	2.05	0.01	0	32.98	0.01	0	5.295	0.002	0.001	13.404	0.006	0.002	18.008	0.046	0.015	-0.691	0.046	0.015	26.959	0.145	0.048	-0.028	0.142	0.047	114.186	3.495	1.165	79.32	3.396	1.132	-1.045	0.023	0.008
R252	2017-04-20 20:52 PDT	CO2 clumped	OK	FALSE	8553 NBS19 Limestone		Chewbacca	NBS 19	Calcite	2017-03-03 00:00:00 PST	90	9	9	2.05	0	0	5.54	0	0	36.57	0	0	5.669	0.004	0.001	16.925	0.004	0.001	22.165	0.037	0.012	-0.411	0.038	0.013	34.803	0.178	0.059	0.645	0.173	0.058	108.332	2.088	0.696	65.933	2.008	0.669	-1.003	0.019	0.006
R253	2017-04-21 11:51 PDT	CO2 clumped	OK	FALSE	Bonedry DI H NH 4.7.17		Chewbacca	Heated Gas	CO2	2017-03-03 00:00:00 PST		9	9	-37.68	0	0	-5.94	0	0	24.74	0	0	-31.988	0.004	0.001	5.247	0.004	0.001	-28.909	0.041	0.014	-0.922	0.037	0.012	9.437	0.193	0.064	-1.073	0.186	0.062	119.143	3.387	1.129	146.787	3.48	1.16	-1.112	0.026	0.009
R254	2017-04-21 14:01 PDT	CO2 clumped	OK	FALSE	ETH-1		Chewbacca	ETH-1-1	Calcite	2017-03-03 00:00:00 PST	90	9	9	2.07	0	0	5.4	0	0	36.43	0.01	0	5.692	0.002	0.001	16.788	0.005	0.002	21.921	0.033	0.011	-0.54	0.031	0.01	34.399	0.156	0.052	0.524	0.148	0.049	108.168	2.154	0.718	66.032	2.075	0.692	-1.011	0.017	0.006
R255	2017-04-21 20:34 PDT	CO2 clumped	OK	FALSE	ETH-2		Chewbacca	ETH-2-1	Calcite	2017-03-03 00:00:00 PST	90	9	9	-10.04	0	0	-10.94	0	0	19.59	0	0	-6.238	0.004	0.001	0.258	0.003	0.001	-6.866	0.03	0.01	-0.687	0.032	0.011	-1.226	0.16	0.053	-1.74	0.159	0.053	114.05	2.521	0.84	120.936	2.541	0.847	-1.069	0.022	0.007
R256	2017-04-22 12:57 PDT	CO2 clumped	OK	FALSE	Bonedry DI UH NH 4.7.17		Chewbacca	Unheated gas	CO2	2017-03-03 00:00:00 PST		9	9	-37.39	0	0	-3.83	0	0	26.92	0	0	-31.647	0.003	0.001	7.383	0.004	0.001	-25.835	0.037	0.012	-0.212	0.04	0.013	14.403	0.134	0.045	-0.411	0.131	0.044	109.758	1.42	0.473	132.013	1.452	0.484	-1.025	0.01	0.003
R257	2017-04-22 15:02 PDT	CO2 clumped	OK	FALSE	ETH-3		Chewbacca	ETH-3-1	Calcite	2017-03-03 00:00:00 PST	90	9	9	1.72	0	0	5.78	0	0	36.82	0	0	5.37	0.003	0.001	17.175	0.004	0.001	22.347	0.03	0.01	-0.166	0.032	0.011	35.544	0.199	0.066	0.87	0.196	0.065	98.229	1.724	0.575	56.042	1.66	0.553	-0.921	0.015	0.005
R258	2017-04-22 21:44 PDT	CO2 clumped	OK	FALSE	ETH-4		Chewbacca	ETH-4-1	Calcite	2017-03-03 00:00:00 PST	90	9	9	-10.1	0	0	-11.17	0.01	0	19.35	0.01	0	-6.303	0.003	0.001	0.025	0.006	0.002	-6.969	0.036	0.012	-0.495	0.038	0.013	-1.629	0.214	0.071	-1.679	0.218	0.073	108.512	0.924	0.308	115.95	0.935	0.312	-1.008	0.009	0.003
R259	2017-04-23 13:31 PDT	CO2 clumped	OK	FALSE	Evap DI+CM UH 4.17.17		Chewbacca	Unheated gas	CO2	2017-03-03 00:00:00 PST		9	9	1.67	0	0	4.83	0	0	35.84	0	0	5.293	0.002	0.001	16.214	0.003	0.001	21.55	0.032	0.011	0.062	0.031	0.01	33.235	0.184	0.061	0.528	0.18	0.06	107.557	2.502	0.834	67.08	2.412	0.804	-1.005	0.019	0.006
R260	2017-04-23 15:38 PDT	CO2 clumped	OK	FALSE	Carrara Marble - UCLA		Chewbacca	Carrara Marble	Calcite	2017-03-03 00:00:00 PST	90	9	9	2.2	0	0	6.05	0	0	37.1	0	0	5.828	0.003	0.001	17.448	0.005	0.002	22.81	0.054	0.018	-0.448	0.053	0.018	35.831	0.109	0.036	0.61	0.108	0.036	106.301	2.095	0.698	62.727	2.013	0.671	-0.991	0.017	0.006
R261	2017-04-24 13:34 PDT	CO2 clumped	OK	FALSE	Evap DI+CM H NH 4.1.17		Chewbacca	Heated Gas	CO2	2017-03-03 00:00:00 PST		9	9	2.25	0	0	-4.53	0	0	26.19	0	0	5.514	0.002	0.001	6.755	0.004	0.001	11.596	0.049	0.016	-0.761	0.05	0.017	12.651	0.116	0.039	-0.892	0.111	0.037	111.153	4.16	1.387	90.144	4.079	1.36	-1.029	0.027	0.009
R262	2017-04-24 22:13 PDT	CO2 clumped	OK	FALSE	TV03		Chewbacca	TV03	Calcite	2017-03-03 00:00:00 PST	90	9	9	2.62	0	0	-0.51	0.01	0	30.33	0.01	0	5.999	0.002	0.001	10.817	0.006	0.002	16.675	0.038	0.013	-0.211	0.038	0.013	21.552	0.266	0.089	-0.195	0.258	0.086	108.713	1.249	0.416	78.62	1.218	0.406	-1.009	0.009	0.003
R263	2017-04-25 12:00 PDT	CO2 clumped	OK	FALSE	Bonedry H NH 4.4.17		Chewbacca	Heated Gas	CO2	2017-03-03 00:00:00 PST		9	9	-37.53	0	0	-6.1	0.01	0	24.58	0.01	0	-31.854	0.004	0.001	5.089	0.007	0.002	-28.929	0.04	0.013	-0.932	0.038	0.013	9.094	0.189	0.063	-1.098	0.187	0.062	121.572	3.248	1.083	149.459	3.338	1.113	-1.127	0.023	0.008
R264	2017-04-25 20:32 PDT	CO2 clumped	OK	FALSE	ETH-2		Chewbacca	ETH-2-1	Calcite	2017-03-03 00:00:00 PST	90	9	9	-10.21	0	0	-11	0.01	0	19.52	0.01	0	-6.399	0.002	0.001	0.192	0.006	0.002	-7.074	0.051	0.017	-0.665	0.052	0.017	-1.342	0.175	0.058	-1.725	0.18	0.06	113.629	2.465	0.822	120.85	2.485	0.828	-1.057	0.023	0.008
R265	2017-04-26 13:00 PDT	CO2 clumped	OK	FALSE	Bonedry UH NH 4.4.17		Chewbacca	Unheated gas	CO2	2017-03-03 00:00:00 PST		9	9	-37.69	0	0	-5.07	0.01	0	25.64	0.01	0	-31.968	0.004	0.001	6.129	0.006	0.002	-27.265	0.042	0.014	-0.115	0.041	0.014	11.604	0.288	0.096	-0.683	0.278	0.093	123.698	3.523	1.174	149.446	3.614	1.205	-1.13	0.026	0.009
R266	2017-04-27 12:26 PDT	CO2 clumped	OK	FALSE	Evap DI+CM UH 4/24/17		Chewbacca	Unheated gas	CO2	2017-03-03 00:00:00 PST		9	9	0.35	0	0	2.34	0	0	33.27	0	0	3.965	0.003	0.001	13.689	0.004	0.001	17.69	0.039	0.013	0.086	0.041	0.014	27.776	0.276	0.092	0.204	0.27	0.09	113.391	3.793	1.264	79.475	3.673	1.224	-1.043	0.022	0.007
R267	2017-04-27 14:30 PDT	CO2 clumped	OK	FALSE	88B Dolomitic Limestone		Chewbacca	SRM 88B	Dolomite	2017-03-03 00:00:00 PST	90	9	9	1.99	0	0	0.99	0	0	31.88	0	0	5.46	0.002	0.001	12.33	0.004	0.001	17.55	0.057	0.019	-0.268	0.056	0.019	24.81	0.131	0.044	-0.002	0.128	0.043	110.697	1.905	0.635	77.996	1.852	0.617	-1.021	0.019	0.006
R268	2017-04-27 20:55 PDT	CO2 clumped	OK	FALSE	Carrara Marble		Chewbacca	Carrara Marble	Calcite	2017-03-03 00:00:00 PST	90	9	9	2	0	0	5.94	0	0	36.98	0	0	5.638	0.004	0.001	17.333	0.004	0.001	22.488	0.042	0.014	-0.458	0.041	0.014	35.724	0.125	0.042	0.731	0.123	0.041	104.922	2.241	0.747	61.85	2.152	0.717	-0.992	0.018	0.006
R269	2017-04-28 13:06 PDT	CO2 clumped	OK	FALSE	Evap DI+CM H NH 4/1/17		Chewbacca	Heated Gas	CO2	2017-03-03 00:00:00 PST		9	9	2.11	0	0	-5.01	0.01	0	25.7	0.01	0	5.363	0.002	0.001	6.27	0.007	0.002	10.973	0.038	0.013	-0.749	0.037	0.012	11.619	0.243	0.081	-0.948	0.242	0.081	108.161	3.31	1.103	88.414	3.259	1.086	-1.025	0.023	0.008
R270	2017-04-29 12:35 PDT	CO2 clumped	OK	FALSE	Bonedry DI H 4/7/17 NH		Chewbacca	Heated Gas	CO2	2017-03-03 00:00:00 PST		9	9	-37.47	0.01	0	-5.41	0	0	25.28	0	0	-31.771	0.005	0.002	5.78	0.003	0.001	-28.191	0.033	0.011	-0.936	0.034	0.011	10.27	0.151	0.05	-1.309	0.151	0.05	144.203	3.643	1.214	170.965	3.735	1.245	-1.326	0.025	0.008
R271	2017-05-01 11:59 PDT	CO2 clumped	OK	FALSE	Bonedry DI UH GJ 4/7/17		Chewbacca	Unheated gas	CO2	2017-03-03 00:00:00 PST		9	9	-37.24	0	0	2.57	0	0	33.51	0	0	-31.285	0.004	0.001	13.844	0.004	0.001	-19.258	0.063	0.021	-0.151	0.065	0.022	28.189	0.148	0.049	0.3	0.142	0.047	115.681	4.784	1.595	123.406	4.82	1.607	-1.1	0.026	0.009
R272	2017-05-01 20:32 PDT	CO2 clumped	OK	FALSE	ETH-4		Chewbacca	ETH-4-1	Calcite	2017-03-03 00:00:00 PST	90	9	9	-10.09	0	0	-11.04	0	0	19.48	0	0	-6.291	0.004	0.001	0.15	0.004	0.001	-6.824	0.02	0.007	-0.483	0.021	0.007	-1.329	0.216	0.072	-1.628	0.218	0.073	109.892	1.642	0.547	117.053	1.649	0.55	-1.04	0.012	0.004
R273	2017-05-02 12:29 PDT	CO2 clumped	OK	FALSE	Evap DI + CM UH GJ 4/17/17		Chewbacca	Unheated gas	CO2	2017-03-03 00:00:00 PST		9	9	2	0	0	4.63	0.01	0	35.64	0.01	0	5.598	0.002	0.001	16.012	0.007	0.002	21.702	0.064	0.021	0.093	0.065	0.022	32.856	0.246	0.082	0.558	0.238	0.079	102.787	3.483	1.161	62.554	3.344	1.115	-0.985	0.02	0.007
R274	2017-05-02 14:33 PDT	CO2 clumped	OK	FALSE	88B Dolomitic Limestone		Chewbacca	SRM 88B	Dolomite	2017-03-03 00:00:00 PST	90	9	9	1.88	0	0	0.83	0	0	31.71	0	0	5.351	0.002	0.001	12.167	0.005	0.002	17.258	0.039	0.013	-0.285	0.038	0.013	24.623	0.198	0.066	0.138	0.199	0.066	102.571	2.507	0.836	70.571	2.439	0.813	-0.981	0.022	0.007
R275	2017-05-03 11:42 PDT	CO2 clumped	OK	FALSE	Evap DI + CM H GJ 4/17/17		Chewbacca	Heated Gas	CO2	2017-03-03 00:00:00 PST		9	9	1.79	0	0	2.41	0	0	33.35	0	0	5.319	0.003	0.001	13.767	0.004	0.001	18.377	0.042	0.014	-0.706	0.042	0.014	27.625	0.228	0.076	-0.096	0.221	0.074	112.415	4.335	1.445	76.817	4.194	1.398	-1.063	0.025	0.008
R276	2017-05-03 13:50 PDT	CO2 clumped	OK	FALSE	Carrara Marble		Chewbacca	Carrara Marble	Calcite	2017-03-03 00:00:00 PST	90	9	9	2.12	0	0	6.19	0	0	37.24	0	0	5.758	0.004	0.001	17.582	0.002	0.001	22.837	0.039	0.013	-0.479	0.04	0.013	36.259	0.234	0.078	0.759	0.228	0.076	107.073	1.528	0.509	63.272	1.469	0.49	-1.021	0.014	0.005
R277	2017-05-03 20:28 PDT	CO2 clumped	OK	FALSE	TV03		Chewbacca	TV03	Calcite	2017-03-03 00:00:00 PST	90	9	9	2.68	0	0	-0.65	0	0	30.19	0	0	6.055	0.003	0.001	10.675	0.002	0.001	16.579	0.052	0.017	-0.224	0.052	0.017	21.354	0.134	0.045	-0.107	0.13	0.043	110.307	1.365	0.455	80.407	1.327	0.442	-1.044	0.012	0.004
R278	2017-05-04 11:28 PDT	CO2 clumped	OK	FALSE	Bonedry DI H NH 4/7/17		Chewbacca	Heated Gas	CO2	2017-03-03 00:00:00 PST		9	9	-37.36	0.01	0	-5.31	0.01	0	25.39	0.01	0	-31.663	0.005	0.002	5.883	0.007	0.002	-27.982	0.031	0.01	-0.936	0.034	0.011	10.934	0.192	0.064	-0.857	0.179	0.06	114.929	2.933	0.978	140.64	3.016	1.005	-1.091	0.02	0.007
R279	2017-05-05 11:32 PDT	CO2 clumped	OK	FALSE	Bonedry DI UH DU 4/28\/17		Chewbacca	Unheated gas	CO2	2017-03-03 00:00:00 PST		9	9	-37.01	0	0	2.86	0	0	33.81	0	0	-31.058	0.003	0.001	14.138	0.004	0.001	-18.731	0.034	0.011	-0.141	0.036	0.012	28.665	0.236	0.079	0.183	0.231	0.077	121.773	2.697	0.899	128.616	2.714	0.905	-1.145	0.018	0.006
R280	2017-05-06 22:33 PDT	CO2 clumped	OK	FALSE	88B Dolomitic Limestone		Chewbacca	SRM 88B	Dolomite	2017-03-03 00:00:00 PST	90	9	9	2.01	0	0	1.02	0	0	31.92	0	0	5.479	0.004	0.001	12.366	0.004	0.001	17.569	0.02	0.007	-0.304	0.023	0.008	24.957	0.187	0.062	0.071	0.185	0.062	106.002	2.352	0.784	73.342	2.279	0.76	-1.003	0.02	0.007
R281	2017-05-07 17:19 PDT	CO2 clumped	OK	FALSE	Carrara Marble-UCLA		Chewbacca	Carrara Marble	Calcite	2017-03-03 00:00:00 PST	90	9	9	2.06	0	0	6.11	0	0	37.16	0	0	5.705	0.002	0.001	17.507	0.003	0.001	22.738	0.057	0.019	-0.448	0.054	0.018	35.963	0.274	0.091	0.621	0.268	0.089	111.582	2.518	0.839	67.817	2.419	0.806	-1.043	0.02	0.007
R282	2017-05-07 23:57 PDT	CO2 clumped	OK	FALSE	TV03		Chewbacca	TV03	Calcite	2017-03-03 00:00:00 PST	90	9	9	2.61	0	0	-0.76	0.01	0	30.08	0.01	0	5.986	0.003	0.001	10.569	0.005	0.002	16.434	0.027	0.009	-0.193	0.026	0.009	21.089	0.257	0.086	-0.157	0.255	0.085	111.763	2.165	0.722	82.126	2.104	0.701	-1.054	0.019	0.006
R283	2017-05-08 13:22 PDT	CO2 clumped	OK	FALSE	Bonedry DI H NH 4/7/17		Chewbacca	Heated Gas	CO2	2017-03-03 00:00:00 PST		9	9	-37.22	0	0	-4.09	0	0	26.64	0	0	-31.496	0.004	0.001	7.115	0.003	0.001	-26.637	0.038	0.013	-0.934	0.037	0.012	13.532	0.256	0.085	-0.738	0.252	0.084	117.341	2.427	0.809	140.154	2.475	0.825	-1.105	0.014	0.005
R284	2017-05-09 13:06 PDT	CO2 clumped	OK	FALSE	Bonedry DI UH DU 5/6/17		Chewbacca	Unheated gas	CO2	2017-03-03 00:00:00 PST		9	9	-38.84	0	0	-6.32	0.01	0	24.34	0.01	0	-33.089	0.004	0.001	4.857	0.007	0.002	-29.64	0.021	0.007	-0.119	0.023	0.008	8.96	0.172	0.057	-0.769	0.162	0.054	114.898	2.098	0.699	144.697	2.169	0.723	-1.084	0.015	0.005
R285	2017-05-10 12:08 PDT	CO2 clumped	OK	FALSE	Evap DI + CM UH GJ 5/8/2017		Chewbacca	Unheated gas	CO2	2017-03-03 00:00:00 PST		9	9	2.1	0	0	5.35	0	0	36.37	0	0	5.717	0.003	0.001	16.733	0.004	0.001	22.482	0.059	0.02	0.036	0.058	0.019	34.021	0.297	0.099	0.266	0.288	0.096	143.052	4.185	1.395	99.677	4.033	1.344	-1.289	0.022	0.007
R286	2017-05-10 20:34 PDT	CO2 clumped	OK	FALSE	ETH-3		Chewbacca	ETH-3-1	Calcite	2017-03-03 00:00:00 PST	90	9	9	1.65	0	0	5.65	0	0	36.68	0	0	5.305	0.004	0.001	17.035	0.004	0.001	22.102	0.026	0.009	-0.205	0.027	0.009	34.893	0.27	0.09	0.515	0.26	0.087	136.328	2.385	0.795	93.047	2.293	0.764	-1.251	0.018	0.006
R287	2017-05-11 12:08 PDT	CO2 clumped	OK	FALSE	Evap DI + CM H GJ 5/8/2017		Chewbacca	Heated Gas	CO2	2017-03-03 00:00:00 PST		9	9	3.01	0	0	4.1	0.01	0	35.08	0.01	0	6.52	0.002	0.001	15.472	0.008	0.003	21.334	0.019	0.006	-0.691	0.024	0.008	31.369	0.17	0.057	0.18	0.162	0.054	111.291	3.203	1.068	70.82	3.075	1.025	-1.043	0.019	0.006
R288	2017-05-11 14:16 PDT	CO2 clumped	OK	FALSE	Carrara Marble - UCLA		Chewbacca	Carrara Marble	Calcite	2017-03-03 00:00:00 PST	90	9	9	2.07	0	0	6.16	0.01	0	37.21	0.01	0	5.712	0.002	0.001	17.551	0.005	0.002	22.766	0.047	0.016	-0.471	0.044	0.015	36.331	0.262	0.087	0.89	0.257	0.086	107.013	1.965	0.655	63.33	1.895	0.632	-1.011	0.018	0.006
R289	2017-05-11 20:40 PDT	CO2 clumped	OK	FALSE	88b dolomitic limestone		Chewbacca	SRM 88B	Dolomite	2017-03-03 00:00:00 PST	90	9	9	2.12	0	0	1.27	0	0	32.17	0	0	5.595	0.002	0.001	12.611	0.004	0.001	17.941	0.032	0.011	-0.295	0.029	0.01	25.565	0.172	0.057	0.179	0.166	0.055	111.299	1.623	0.541	77.837	1.58	0.527	-1.045	0.015	0.005
R290	2017-05-12 11:18 PDT	CO2 clumped	OK	FALSE	Bonedry DI H DU 5/6/2017		Chewbacca	Heated Gas	CO2	2017-03-03 00:00:00 PST		9	9	-37.47	0.01	0	-4.8	0.01	0	25.92	0.01	0	-31.755	0.007	0.002	6.401	0.006	0.002	-27.569	0.034	0.011	-0.92	0.037	0.012	11.958	0.158	0.053	-0.875	0.154	0.051	116.199	3.629	1.21	140.902	3.719	1.24	-1.109	0.022	0.007
R291	2017-05-12 13:22 PDT	CO2 clumped	OK	FALSE	ETH-4		Chewbacca	ETH-4-1	Calcite	2017-03-03 00:00:00 PST	90	9	9	-10.15	0	0	-10.92	0.01	0	19.61	0.01	0	-6.338	0.002	0.001	0.277	0.005	0.002	-6.732	0.022	0.007	-0.468	0.023	0.008	-1.021	0.138	0.046	-1.574	0.136	0.045	110.668	1.816	0.605	117.611	1.829	0.61	-1.057	0.015	0.005
R292	2017-05-12 19:36 PDT	CO2 clumped	OK	FALSE	Carmel Chalk		Chewbacca	Carmel Chalk	Calcite	2017-03-03 00:00:00 PST	90	9	9	-2.19	0	0	3.72	0	0	34.69	0	0	1.634	0.002	0.001	15.079	0.004	0.001	16.321	0.046	0.015	-0.21	0.043	0.014	30.79	0.135	0.045	0.392	0.127	0.042	104.247	1.798	0.599	70.378	1.746	0.582	-0.997	0.016	0.005
R293	2017-05-14 13:16 PDT	CO2 clumped	OK	FALSE	Bonedry DI UH DU 5/10/2017		Chewbacca	Unheated gas	CO2	2017-03-03 00:00:00 PST		9	9	-36.79	0.01	0	-2.79	0.01	0	27.98	0.01	0	-31.043	0.006	0.002	8.428	0.008	0.003	-24.154	0.021	0.007	-0.15	0.024	0.008	16.472	0.307	0.102	-0.447	0.304	0.101	123.297	4.807	1.602	142.732	4.881	1.627	-1.17	0.023	0.008
R294	2017-05-14 15:21 PDT	CO2 clumped	OK	FALSE	ETH-1		Chewbacca	ETH-1-1	Calcite	2017-03-03 00:00:00 PST	90	9	9	2.07	0	0	5.45	0.01	0	36.48	0.01	0	5.688	0.002	0.001	16.841	0.006	0.002	21.977	0.047	0.016	-0.532	0.045	0.015	34.655	0.236	0.079	0.668	0.229	0.076	110.165	2.003	0.668	67.848	1.935	0.645	-1.051	0.019	0.006
R295	2017-05-14 21:40 PDT	CO2 clumped	OK	FALSE	VeinStrom		Chewbacca	Veinstrom	Calcite	2017-03-03 00:00:00 PST	90	9	9	-6.04	0	0	-4.82	0	0	25.89	0	0	-2.275	0.003	0.001	6.445	0.004	0.001	3.709	0.041	0.014	-0.264	0.042	0.014	12.165	0.187	0.062	-0.757	0.189	0.063	113.34	2.245	0.748	102.045	2.226	0.742	-1.077	0.023	0.008
R296	2017-05-15 12:07 PDT	CO2 clumped	OK	FALSE	Evap DI+CM UH GJ 4/24/17		Chewbacca	Unheated gas	CO2	2017-03-03 00:00:00 PST		9	9	0.97	0	0	3.31	0	0	34.27	0	0	4.579	0.002	0.001	14.669	0.002	0.001	19.313	0.041	0.014	0.098	0.041	0.014	30.14	0.364	0.121	0.57	0.354	0.118	105.044	3.456	1.152	68.653	3.343	1.114	-1.006	0.026	0.009
R297	2017-05-15 14:18 PDT	CO2 clumped	OK	FALSE	ETH-2		Chewbacca	ETH-2-1	Calcite	2017-03-03 00:00:00 PST	90	9	9	-10.1	0	0	-10.83	0.01	0	19.69	0.01	0	-6.292	0.002	0.001	0.36	0.005	0.002	-6.825	0.051	0.017	-0.691	0.052	0.017	-0.802	0.234	0.078	-1.521	0.232	0.077	112.298	1.894	0.631	119.012	1.901	0.634	-1.072	0.016	0.005
R298	2017-05-15 20:41 PDT	CO2 clumped	OK	FALSE	ETH-3		Chewbacca	ETH-3-1	Calcite	2017-03-03 00:00:00 PST	90	9	9	1.72	0	0	5.83	0.01	0	36.87	0.01	0	5.376	0.003	0.001	17.219	0.005	0.002	22.344	0.039	0.013	-0.219	0.04	0.013	35.699	0.266	0.089	0.931	0.254	0.085	104.214	1.682	0.561	61.698	1.622	0.541	-0.988	0.016	0.005
R299	2017-05-16 13:42 PDT	CO2 clumped	OK	FALSE	Evap DI+CM H NH 4/1/17		Chewbacca	Heated Gas	CO2	2017-03-03 00:00:00 PST		9	9	2.17	0	0	-5.84	0	0	24.84	0	0	5.391	0.002	0.001	5.429	0.004	0.001	10.171	0.041	0.014	-0.749	0.04	0.013	9.751	0.291	0.097	-1.125	0.289	0.096	114.588	3.306	1.102	96.493	3.25	1.083	-1.077	0.022	0.007
R300	2017-05-16 15:53 PDT	CO2 clumped	OK	FALSE	Carrara Marble		Chewbacca	Carrara Marble	Calcite	2017-03-03 00:00:00 PST	90	9	9	2.09	0	0	6.1	0	0	37.14	0	0	5.729	0.002	0.001	17.49	0.005	0.002	22.767	0.047	0.016	-0.429	0.043	0.014	36.059	0.135	0.045	0.746	0.134	0.045	108.203	1.838	0.613	64.577	1.764	0.588	-1.025	0.017	0.006
R301	2017-05-16 22:17 PDT	CO2 clumped	OK	FALSE	Carmel Chalk		Chewbacca	Carmel Chalk	Calcite	2017-03-03 00:00:00 PST	90	9	9	-2.14	0	0	3.7	0	0	34.68	0	0	1.68	0.002	0.001	15.065	0.005	0.002	16.355	0.037	0.012	-0.21	0.036	0.012	31.023	0.32	0.107	0.646	0.311	0.104	109.055	1.78	0.593	75.015	1.72	0.573	-1.026	0.015	0.005
R302	2017-05-17 11:45 PDT	CO2 clumped	OK	FALSE	Bonedry DI H DU 5/6/17		Chewbacca	Heated Gas	CO2	2017-03-03 00:00:00 PST		9	9	-38.26	0	0	-6.04	0	0	24.63	0	0	-32.534	0.004	0.001	5.139	0.005	0.002	-29.601	0.031	0.01	-0.947	0.039	0.013	8.999	0.434	0.145	-1.291	0.426	0.142	129.262	3.215	1.072	158.097	3.306	1.102	-1.215	0.021	0.007
R303	2017-05-17 13:56 PDT	CO2 clumped	OK	FALSE	VeinStrom		Chewbacca	Veinstrom	Calcite	2017-03-03 00:00:00 PST	90	9	9	-6.06	0	0	-4.94	0.01	0	25.77	0.01	0	-2.292	0.003	0.001	6.326	0.006	0.002	3.594	0.035	0.012	-0.244	0.037	0.012	12.364	0.319	0.106	-0.324	0.32	0.107	120.739	2.253	0.751	109.647	2.233	0.744	-1.13	0.02	0.007
R304	2017-05-17 20:17 PDT	CO2 clumped	OK	FALSE	88B Dolomitic Limestone		Chewbacca	SRM 88B	Dolomite	2017-03-03 00:00:00 PST	90	9	9	1.97	0	0	1.29	0	0	32.19	0	0	5.456	0.002	0.001	12.635	0.004	0.001	17.816	0.044	0.015	-0.299	0.046	0.015	25.746	0.496	0.165	0.308	0.487	0.162	115.616	2.249	0.75	82.133	2.184	0.728	-1.087	0.021	0.007
R305	2017-05-18 09:31 PDT	CO2 clumped	OK	FALSE	Bonedry DI uH GJ 5/10/17		Chewbacca	Unheated gas	CO2	2017-03-03 00:00:00 PST		9	9	-37.25	0	0	-3.5	0	0	27.25	0	0	-31.504	0.003	0.001	7.707	0.005	0.002	-25.273	0.041	0.014	-0.103	0.044	0.015	15.019	0.357	0.119	-0.447	0.358	0.119	117.571	3.935	1.312	139.084	4.013	1.338	-1.105	0.023	0.008
R306	2017-05-19 12:20 PDT	CO2 clumped	OK	FALSE	Evap DI+CM UH GJ 4/24/17		Chewbacca	Unheated gas	CO2	2017-03-03 00:00:00 PST		9	9	2.91	0	0	7.13	0.01	0	38.21	0.01	0	6.534	0.003	0.001	18.533	0.011	0.004	25.161	0.04	0.013	0.077	0.043	0.014	38.649	0.668	0.223	1.196	0.65	0.217	100.763	3.475	1.158	54.406	3.306	1.102	-0.972	0.018	0.006
R307	2017-05-19 20:53 PDT	CO2 clumped	OK	FALSE	ETH-3		Chewbacca	ETH-3-1	Calcite	2017-03-03 00:00:00 PST	90	9	9	1.66	0	0	5.68	0.01	0	36.72	0.01	0	5.31	0.002	0.001	17.071	0.006	0.002	22.149	0.032	0.011	-0.199	0.033	0.011	35.386	0.468	0.156	0.922	0.449	0.15	97.104	2.011	0.67	55.24	1.939	0.646	-0.937	0.018	0.006
R308	2017-05-20 13:18 PDT	CO2 clumped	OK	FALSE	Evap DI+CM H GJ 5/8/17		Chewbacca	Heated Gas	CO2	2017-03-03 00:00:00 PST		9	9	1.87	0	0	2.65	0.01	0	33.59	0.01	0	5.403	0.002	0.001	14.011	0.006	0.002	18.727	0.042	0.014	-0.684	0.042	0.014	28.431	0.362	0.121	0.208	0.347	0.116	98.93	3.117	1.039	63.168	3.012	1.004	-0.956	0.021	0.007
R309	2017-05-20 15:32 PDT	CO2 clumped	OK	FALSE	ETH-4		Chewbacca	ETH-4-1	Calcite	2017-03-03 00:00:00 PST	90	9	9	-10.09	0	0	-11.12	0	0	19.39	0	0	-6.293	0.003	0.001	0.068	0.001	0	-6.906	0.019	0.006	-0.485	0.02	0.007	-1.441	0.4	0.133	-1.576	0.4	0.133	102.951	1.854	0.618	110.247	1.865	0.622	-1.002	0.017	0.006
R310	2017-05-20 22:04 PDT	CO2 clumped	OK	FALSE	Carrara Marble		Chewbacca	Carrara Marble	Calcite	2017-03-03 00:00:00 PST	90	9	9	2.07	0	0	6.14	0	0	37.19	0	0	5.714	0.002	0.001	17.534	0.004	0.001	22.751	0.049	0.016	-0.472	0.049	0.016	36.247	0.394	0.131	0.843	0.377	0.126	94.426	1.738	0.579	51.272	1.67	0.557	-0.915	0.016	0.005
R311	2017-05-22 11:49 PDT	CO2 clumped	OK	FALSE	Bonedry DI UH DU 5/6/17		Chewbacca	Unheated gas	CO2	2017-03-03 00:00:00 PST		9	9	-38.46	0	0	-5.54	0	0	25.15	0	0	-32.707	0.003	0.001	5.652	0.004	0.001	-28.47	0.023	0.008	-0.099	0.026	0.009	10.844	0.326	0.109	-0.487	0.327	0.109	114.12	4.562	1.521	141.641	4.682	1.561	-1.096	0.028	0.009
R312	2017-05-22 16:08 PDT	CO2 clumped	OK	FALSE	Carmel Chalk		Chewbacca	Carmel Chalk	Calcite	2017-03-03 00:00:00 PST	90	9	9	-2.1	0	0	3.67	0.01	0	34.65	0.01	0	1.718	0.003	0.001	15.035	0.005	0.002	16.354	0.043	0.014	-0.221	0.044	0.015	30.944	0.398	0.133	0.63	0.389	0.13	105.654	1.147	0.382	71.739	1.108	0.369	-1.01	0.009	0.003
R313	2017-05-22 23:56 PDT	CO2 clumped	OK	FALSE	SRM 88B		Chewbacca	SRM 88B	Dolomite	2017-03-03 00:00:00 PST	90	9	9	1.85	0	0	1.36	0	0	32.26	0	0	5.341	0.002	0.001	12.704	0.003	0.001	17.754	0.033	0.011	-0.308	0.032	0.011	25.453	0.48	0.16	-0.115	0.467	0.156	105.078	2.014	0.671	71.899	1.954	0.651	-0.999	0.02	0.007
R314	2017-05-23 12:33 PDT	CO2 clumped	OK	FALSE	Bonedry DI H GJ 5/10/17		Chewbacca	Heated Gas	CO2	2017-03-03 00:00:00 PST		9	9	-38.17	0	0	-6.22	0	0	24.45	0	0	-32.456	0.003	0.001	4.961	0.004	0.001	-29.706	0.054	0.018	-0.964	0.055	0.018	8.866	0.408	0.136	-1.071	0.408	0.136	117.173	2.218	0.739	145.998	2.284	0.761	-1.111	0.018	0.006
R315	2017-05-23 14:50 PDT	CO2 clumped	OK	FALSE	88B Dolomitic Limestone		Chewbacca	SRM 88B	Dolomite	2017-03-03 00:00:00 PST	90	9	9	2.05	0	0	1.11	0.01	0	32.01	0.01	0	5.522	0.002	0.001	12.457	0.005	0.002	17.742	0.044	0.015	-0.266	0.042	0.014	25.028	0.268	0.089	-0.04	0.262	0.087	107.183	2.512	0.837	74.25	2.442	0.814	-1.022	0.023	0.008
R316	2017-05-23 21:17 PDT	CO2 clumped	OK	FALSE	ETH-1		Chewbacca	ETH-1-1	Calcite	2017-03-03 00:00:00 PST	90	9	9	2.11	0	0	5.51	0	0	36.54	0	0	5.73	0.002	0.001	16.895	0.004	0.001	22.024	0.044	0.015	-0.581	0.047	0.016	34.461	0.68	0.227	0.372	0.658	0.219	104.097	1.738	0.579	61.853	1.669	0.556	-0.988	0.014	0.005
R317	2017-05-24 11:52 PDT	CO2 clumped	OK	FALSE	Evap DI + CM UH NH 3-30-17		Chewbacca	Unheated gas	CO2	2017-03-03 00:00:00 PST		9	9	2.02	0	0	-3.05	0	0	27.72	0	0	5.353	0.003	0.001	8.252	0.004	0.001	13.751	0.035	0.012	0.071	0.036	0.012	16.212	0.322	0.107	-0.353	0.313	0.104	114.738	2.064	0.688	90.66	2.024	0.675	-1.094	0.019	0.006
R318	2017-05-24 14:04 PDT	CO2 clumped	OK	FALSE	Cararra Marble		Chewbacca	Carrara Marble	Calcite	2017-03-03 00:00:00 PST	90	9	9	2.1	0	0	6.09	0	0	37.14	0	0	5.738	0.002	0.001	17.488	0.003	0.001	22.76	0.038	0.013	-0.443	0.037	0.012	36.178	0.511	0.17	0.866	0.493	0.164	113.681	2.514	0.838	69.835	2.416	0.805	-1.066	0.021	0.007
R319	2017-05-24 20:51 PDT	CO2 clumped	OK	FALSE	ETH-2		Chewbacca	ETH-2-1	Calcite	2017-03-03 00:00:00 PST	90	9	9	-10.03	0	0	-11.02	0	0	19.5	0	0	-6.227	0.002	0.001	0.173	0.004	0.001	-6.981	0.018	0.006	-0.731	0.019	0.006	1.094	13.747	4.582	0.748	13.745	4.582	145.295	18.369	6.123	152.553	18.489	6.163	-1.252	0.028	0.009
R320	2017-05-25 11:47 PDT	CO2 clumped	OK	FALSE	Evap DI + CM H DU 5/17/17		Chewbacca	Heated Gas	CO2	2017-03-03 00:00:00 PST		9	9	1.88	0	0	3.06	0.01	0	34.01	0.01	0	5.431	0.003	0.001	14.418	0.005	0.002	19.12	0.049	0.016	-0.722	0.048	0.016	27.577	0.54	0.18	-1.425	0.533	0.178	121.234	5.209	1.736	83.858	5.032	1.677	-1.091	0.026	0.009
R321	2017-05-25 13:53 PDT	CO2 clumped	OK	FALSE	ETH-3		Chewbacca	ETH-3-1	Calcite	2017-03-03 00:00:00 PST	90	9	9	1.69	0	0	5.7	0	0	36.73	0	0	5.34	0.003	0.001	17.085	0.003	0.001	22.22	0.038	0.013	-0.173	0.04	0.013	34.264	0.425	0.142	-0.191	0.41	0.137	114.404	1.294	0.431	71.816	1.244	0.415	-1.048	0.013	0.004
R322	2017-05-25 20:18 PDT	CO2 clumped	OK	FALSE	ETH-4		Chewbacca	ETH-4-1	Calcite	2017-03-03 00:00:00 PST	90	9	9	-10.12	0	0	-11.22	0	0	19.29	0	0	-6.319	0.003	0.001	-0.034	0.005	0.002	-7.023	0.035	0.012	-0.475	0.039	0.013	-1.704	0.847	0.282	-1.637	0.845	0.282	120.007	1.799	0.6	127.672	1.814	0.605	-1.111	0.015	0.005
R323	2017-05-26 11:24 PDT	CO2 clumped	OK	FALSE	Bonedry DI UH DU 5/22/17		Chewbacca	Unheated gas	CO2	2017-03-03 00:00:00 PST		9	9	-37.85	0	0	1.57	0	0	32.48	0	0	-31.89	0.003	0.001	12.836	0.003	0.001	-20.801	0.018	0.006	-0.103	0.02	0.007	25.577	0.27	0.09	-0.254	0.268	0.089	116.011	2.353	0.784	126.688	2.373	0.791	-1.082	0.015	0.005
R324	2017-05-26 13:32 PDT	CO2 clumped	OK	FALSE	Veinstrom		Chewbacca	Veinstrom	Calcite	2017-03-03 00:00:00 PST	90	9	9	-6.05	0	0	-4.95	0	0	25.75	0	0	-2.29	0.002	0.001	6.309	0.004	0.001	3.564	0.038	0.013	-0.261	0.035	0.012	11.842	0.481	0.16	-0.805	0.471	0.157	110.646	1.348	0.449	99.687	1.34	0.447	-1.037	0.013	0.004
R325	2017-05-26 19:50 PDT	CO2 clumped	OK	FALSE	Carmel Chalk		Chewbacca	Carmel Chalk	Calcite	2017-03-03 00:00:00 PST	90	9	9	-2.13	0	0	3.72	0	0	34.7	0	0	1.69	0.002	0.001	15.085	0.005	0.002	16.338	0.035	0.012	-0.256	0.035	0.012	30.288	0.614	0.205	-0.106	0.591	0.197	105.697	1.657	0.552	71.708	1.606	0.535	-0.991	0.013	0.004
R326	2017-05-27 14:03 PDT	CO2 clumped	OK	FALSE	Bonedry DI H DU3-24		Chewbacca	Heated Gas	CO2	2017-03-03 00:00:00 PST		9	9	-37.89	0	0	-3.16	0.01	0	27.6	0.01	0	-32.087	0.003	0.001	8.053	0.007	0.002	-26.417	0.043	0.014	-0.992	0.049	0.016	14.583	0.391	0.13	-1.563	0.384	0.128	172.995	2.751	0.917	195.536	2.811	0.937	-1.47	0.017	0.006
R327	2017-05-27 16:10 PDT	CO2 clumped	OK	FALSE	ETH-1		Chewbacca	ETH-1-1	Calcite	2017-03-03 00:00:00 PST	90	9	9	2.09	0	0	5.4	0	0	36.42	0	0	5.706	0.003	0.001	16.785	0.004	0.001	21.877	0.045	0.015	-0.594	0.042	0.014	33.817	0.308	0.103	-0.033	0.299	0.1	159.702	0.958	0.319	115.596	0.925	0.308	-1.363	0.009	0.003
R328	2017-05-28 13:41 PDT	CO2 clumped	OK	FALSE	EvapDI+CM U GJ4-24		Chewbacca	Unheated gas	CO2	2017-03-03 00:00:00 PST		9	9	1.17	0	0	3.5	0	0	34.46	0	0	4.78	0.003	0.001	14.862	0.004	0.001	19.748	0.027	0.009	0.131	0.025	0.008	30.553	0.374	0.125	0.591	0.359	0.12	117.794	3.765	1.255	80.35	3.641	1.214	-1.13	0.026	0.009
R329	2017-05-29 00:18 PDT	CO2 clumped	OK	FALSE	ETH-2		Chewbacca	ETH-2-1	Calcite	2017-03-03 00:00:00 PST	90	9	9	-10	0	0	-10.99	0	0	19.53	0	0	-6.204	0.001	0	0.202	0.003	0.001	-6.885	0.036	0.012	-0.688	0.036	0.012	-1.091	0.415	0.138	-1.496	0.411	0.137	127.397	1.339	0.446	134.446	1.347	0.449	-1.244	0.014	0.005
R330	2017-05-29 12:56 PDT	CO2 clumped	OK	FALSE	EvapDI+CM H GJ 5/8/17		Chewbacca	Heated Gas	CO2	2017-03-03 00:00:00 PST		9	9	1.81	0	0	2.58	0	0	33.51	0	0	5.342	0.004	0.001	13.933	0.005	0.002	18.537	0.034	0.011	-0.733	0.032	0.011	27.913	0.4	0.133	-0.143	0.384	0.128	107.7	2.971	0.99	71.883	2.874	0.958	-1.088	0.022	0.007
R331	2017-05-30 12:41 PDT	CO2 clumped	OK	FALSE	bonedry DI UH GJ 5/22/17		Chewbacca	Unheated gas	CO2	2017-03-03 00:00:00 PST		9	9	-38.26	0	0	0.72	0	0	31.61	0	0	-32.305	0.003	0.001	11.977	0.005	0.002	-22.081	0.035	0.012	-0.134	0.04	0.013	24.467	0.385	0.128	0.361	0.374	0.125	106.247	2.765	0.922	119.208	2.794	0.931	-1.092	0.021	0.007
R332	2017-05-30 14:52 PDT	CO2 clumped	OK	FALSE	Veinstrom		Chewbacca	Veinstrom	Calcite	2017-03-03 00:00:00 PST	90	9	9	-6.12	0	0	-5.06	0	0	25.65	0	0	-2.352	0.003	0.001	6.203	0.002	0.001	3.401	0.059	0.02	-0.256	0.059	0.02	11.66	0.259	0.086	-0.776	0.255	0.085	103.238	1.6	0.533	92.649	1.585	0.528	-1.053	0.015	0.005
R333	2017-05-30 21:10 PDT	CO2 clumped	OK	FALSE	Carmel Chalk		Chewbacca	Carmel Chalk	Calcite	2017-03-03 00:00:00 PST	90	9	9	-2.11	0	0	3.73	0	0	34.71	0.01	0	1.708	0.002	0.001	15.092	0.005	0.002	16.402	0.037	0.012	-0.219	0.036	0.012	30.978	0.203	0.068	0.55	0.199	0.066	100.382	1.432	0.477	66.522	1.385	0.462	-1.024	0.013	0.004
R334	2017-05-31 12:14 PDT	CO2 clumped	OK	FALSE	bonedry DI H GJ 5/10/17		Chewbacca	Heated Gas	CO2	2017-03-03 00:00:00 PST		9	9	-38.01	0.01	0	-5.38	0	0	25.32	0.01	0	-32.28	0.005	0.002	5.813	0.005	0.002	-28.733	0.034	0.011	-0.983	0.035	0.012	10.584	0.306	0.102	-1.064	0.302	0.101	113.13	3.524	1.175	139.731	3.613	1.204	-1.142	0.026	0.009
R335	2017-05-31 14:19 PDT	CO2 clumped	OK	FALSE	ETH-1		Chewbacca	ETH-1-1	Calcite	2017-03-03 00:00:00 PST	90	9	9	2.02	0	0	5.39	0	0	36.42	0	0	5.637	0.002	0.001	16.778	0.002	0.001	21.829	0.031	0.01	-0.564	0.032	0.011	34.697	0.225	0.075	0.831	0.218	0.073	100.361	2.458	0.819	58.603	2.368	0.789	-1.028	0.025	0.008
R336	2017-05-31 20:43 PDT	CO2 clumped	OK	FALSE	ETH-2		Chewbacca	ETH-2-1	Calcite	2017-03-03 00:00:00 PST	90	9	9	-10.08	0	0	-11.1	0	0	19.41	0	0	-6.28	0.003	0.001	0.086	0.003	0.001	-7.081	0.047	0.016	-0.692	0.049	0.016	-1.567	0.332	0.111	-1.74	0.336	0.112	106.764	1.892	0.631	114.029	1.907	0.636	-1.096	0.016	0.005
R337	2017-06-04 13:36 PDT	CO2 clumped	OK	FALSE	Bonedry DI UH 5/22/17 GJ		Chewbacca	Unheated gas	CO2	2017-03-03 00:00:00 PST		9	9	-38.26	0	0	0.75	0	0	31.64	0	0	-32.298	0.005	0.002	12.006	0.004	0.001	-22.025	0.018	0.006	-0.113	0.023	0.008	23.437	0.368	0.123	-0.702	0.363	0.121	112.694	4.789	1.596	125.657	4.846	1.615	-1.122	0.024	0.008
R338	2017-06-04 15:46 PDT	CO2 clumped	OK	FALSE	Carmel Chalk		Chewbacca	Carmel Chalk	Calcite	2017-03-03 00:00:00 PST	90	9	9	-2.25	0	0	3.52	0	0	34.49	0	0	1.569	0.001	0	14.877	0.003	0.001	16.048	0.032	0.011	-0.216	0.032	0.011	29.812	0.196	0.065	-0.159	0.191	0.064	102.581	2.165	0.722	69.256	2.099	0.7	-1.044	0.02	0.007
R339	2017-06-04 17:51 PDT	CO2 clumped	OK	FALSE	Eth-1		Chewbacca	ETH-1-1	Calcite	2017-03-03 00:00:00 PST	90	9	9	2.09	0	0	5.49	0	0	36.52	0.01	0	5.713	0.002	0.001	16.877	0.005	0.002	22.009	0.064	0.021	-0.562	0.061	0.02	33.97	0.135	0.045	-0.067	0.131	0.044	101.328	1.517	0.506	59.245	1.458	0.486	-1.025	0.013	0.004
R340	2017-06-04 19:57 PDT	CO2 clumped	OK	FALSE	Eth- 2		Chewbacca	ETH-2-1	Calcite	2017-03-03 00:00:00 PST	90	9	9	-10.11	0	0	-11.14	0	0	19.38	0	0	-6.306	0.001	0	0.051	0.004	0.001	-7.177	0.036	0.012	-0.727	0.035	0.012	-1.514	0.266	0.089	-1.616	0.268	0.089	106.78	2.399	0.8	114.155	2.416	0.805	-1.084	0.024	0.008
R341	2017-06-04 22:03 PDT	CO2 clumped	OK	FALSE	Vienstrom		Chewbacca	Veinstrom	Calcite	2017-03-03 00:00:00 PST	90	9	9	-6.06	0	0	-4.99	0	0	25.71	0	0	-2.302	0.003	0.001	6.27	0.003	0.001	3.478	0.04	0.013	-0.296	0.039	0.013	11.47	0.311	0.104	-1.096	0.306	0.102	105.033	1.631	0.544	94.227	1.615	0.538	-1.057	0.018	0.006
R342	2017-06-05 00:09 PDT	CO2 clumped	OK	FALSE	88B dolomitic limestone		Chewbacca	SRM 88B	Dolomite	2017-03-03 00:00:00 PST	90	9	9	2.17	0	0	1.27	0.01	0	32.17	0.01	0	5.636	0.002	0.001	12.616	0.007	0.002	17.991	0.031	0.01	-0.293	0.027	0.009	24.936	0.241	0.08	-0.444	0.23	0.077	101.028	1.67	0.557	67.818	1.617	0.539	-1.025	0.015	0.005
R343	2017-06-05 13:28 PDT	CO2 clumped	OK	FALSE	Evap DI+CM H 4/24/17 GJ		Chewbacca	Heated Gas	CO2	2017-03-03 00:00:00 PST		9	9	0.96	0	0	1.05	0.01	0	31.94	0.01	0	4.501	0.005	0.002	12.392	0.006	0.002	16.137	0.024	0.008	-0.733	0.024	0.008	24.631	0.278	0.093	-0.299	0.272	0.091	98.982	2.882	0.961	67.582	2.794	0.931	-1.009	0.019	0.006
R344	2017-06-05 15:37 PDT	CO2 clumped	OK	FALSE	ETH-3		Chewbacca	ETH-3-1	Calcite	2017-03-03 00:00:00 PST	90	9	9	1.73	0	0	5.78	0	0	36.82	0	0	5.383	0.003	0.001	17.168	0.004	0.001	22.344	0.039	0.013	-0.177	0.041	0.014	35.099	0.281	0.094	0.452	0.269	0.09	95.561	1.858	0.619	53.474	1.784	0.595	-0.979	0.016	0.005
R345	2017-06-05 21:57 PDT	CO2 clumped	OK	FALSE	ETH-4		Chewbacca	ETH-4-1	Calcite	2017-03-03 00:00:00 PST	90	9	9	-10.1	0	0	-11.19	0.01	0	19.33	0.01	0	-6.301	0.003	0.001	0.001	0.006	0.002	-6.975	0.036	0.012	-0.48	0.04	0.013	-1.733	0.237	0.079	-1.735	0.233	0.078	100.663	1.572	0.524	108.1	1.581	0.527	-1.033	0.017	0.006
R346	2017-06-06 13:10 PDT	CO2 clumped	OK	FALSE	Evap DI+CM UH 6/1/17 DU		Chewbacca	Unheated gas	CO2	2017-03-03 00:00:00 PST		9	9	0.31	0	0	-3.95	0.01	0	26.79	0.01	0	3.716	0.002	0.001	7.336	0.01	0.003	11.165	0.035	0.012	0.09	0.035	0.012	13.812	0.223	0.074	-0.901	0.231	0.077	114.993	4.471	1.49	94.757	4.374	1.458	-1.148	0.026	0.009
R347	2017-06-06 15:13 PDT	CO2 clumped	OK	FALSE	Carrara Marble		Chewbacca	Carrara Marble	Calcite	2017-03-03 00:00:00 PST	90	9	9	2.14	0	0	6.18	0	0	37.23	0	0	5.781	0.002	0.001	17.578	0.002	0.001	22.884	0.052	0.017	-0.453	0.051	0.017	35.917	0.259	0.086	0.436	0.249	0.083	106.739	1.356	0.452	62.933	1.304	0.435	-1.079	0.014	0.005
R348	2017-06-10 12:02 PDT	CO2 clumped	OK	FALSE	Bonedry DI UH 6.7.17 DU		Chewbacca	Unheated gas	CO2	2017-03-03 00:00:00 PST		9	9	-37.37	0	0	2.29	0.05	0.02	33.22	0.05	0.02	-31.417	0.002	0.001	13.564	0.047	0.016	-19.601	0.052	0.017	-0.088	0.031	0.01	26.163	0.167	0.056	-1.118	0.132	0.044	264.715	6.553	2.184	274.35	6.503	2.168	-1.467	0.021	0.007
R349	2017-06-10 14:05 PDT	CO2 clumped	OK	FALSE	88b dolomitic limestone		Chewbacca	SRM 88B	Dolomite	2017-03-03 00:00:00 PST	90	9	9	1.88	0	0	1.1	0.01	0	31.99	0.01	0	5.358	0.004	0.001	12.442	0.006	0.002	17.513	0.029	0.01	-0.309	0.024	0.008	23.898	0.238	0.079	-1.113	0.232	0.077	238.983	3.096	1.032	202.372	3.012	1.004	-1.36	0.017	0.006
R350	2017-06-10 19:17 PDT	CO2 clumped	OK	FALSE	ETH-1		Chewbacca	ETH-1-1	Calcite	2017-03-03 00:00:00 PST	90	9	9	1.83	0	0	5.49	0.01	0	36.52	0.01	0	5.462	0.002	0.001	16.882	0.009	0.003	21.748	0.034	0.011	-0.564	0.038	0.013	33.539	0.216	0.072	-0.492	0.199	0.066	201.334	6.312	2.104	155.727	6.088	2.029	-1.241	0.016	0.005
R351	2017-06-11 04:12 PDT	CO2 clumped	OK	FALSE	VeinStrom		Chewbacca	Veinstrom	Calcite	2017-03-03 00:00:00 PST	90	9	9	-6.1	0	0	-4.82	0.01	0	25.89	0.01	0	-2.333	0.004	0.001	6.441	0.007	0.002	3.637	0.048	0.016	-0.273	0.048	0.016	11.548	0.143	0.048	-1.358	0.141	0.047	200.583	3.104	1.035	188.484	3.075	1.025	-1.321	0.019	0.006
R352	2017-06-11 14:48 PDT	CO2 clumped	OK	FALSE	BondryDI H DU5-6		Chewbacca	Heated Gas	CO2	2017-03-03 00:00:00 PST		9	9	-37.84	0	0	-5.57	0.01	0	25.12	0.01	0	-32.13	0.003	0.001	5.619	0.009	0.003	-28.679	0.025	0.008	-0.898	0.032	0.011	9.862	0.181	0.06	-1.392	0.175	0.058	167.961	4.269	1.423	196.128	4.388	1.463	-1.246	0.022	0.007
R353	2017-06-11 16:52 PDT	CO2 clumped	OK	FALSE	Carmel Chalk		Chewbacca	Carmel Chalk	Calcite	2017-03-03 00:00:00 PST	90	9	9	-2.29	0	0	3.63	0.01	0	34.6	0.01	0	1.536	0.002	0.001	14.986	0.01	0.003	16.11	0.025	0.008	-0.228	0.023	0.008	29.88	0.177	0.059	-0.308	0.163	0.054	152.757	2.846	0.949	117.718	2.772	0.924	-1.146	0.017	0.006
R354	2017-06-12 12:01 PDT	CO2 clumped	OK	FALSE	Evap DI+CM H 6/1/17 DU		Chewbacca	Heated Gas	CO2	2017-03-03 00:00:00 PST		9	9	1.06	0	0	-3.05	0.01	0	27.71	0.01	0	4.45	0.004	0.001	8.246	0.008	0.003	11.98	0.046	0.015	-0.746	0.041	0.014	15.644	0.207	0.069	-0.901	0.201	0.067	146.822	3.308	1.103	123.136	3.227	1.076	-1.175	0.018	0.006
R355	2017-06-12 14:12 PDT	CO2 clumped	OK	FALSE	Carrara Marble		Chewbacca	Carrara Marble	Calcite	2017-03-03 00:00:00 PST	90	9	9	1.99	0	0	6.11	0.01	0	37.16	0.01	0	5.641	0.003	0.001	17.502	0.009	0.003	22.662	0.059	0.02	-0.453	0.053	0.018	35.33	0.158	0.053	0.02	0.147	0.049	140.783	3.926	1.309	95.953	3.784	1.261	-1.131	0.029	0.01
R356	2017-06-12 20:22 PDT	CO2 clumped	OK	FALSE	SRM 88B		Chewbacca	SRM 88B	Dolomite	2017-03-03 00:00:00 PST	90	9	9	1.95	0	0	1.17	0.01	0	32.07	0.01	0	5.434	0.002	0.001	12.518	0.006	0.002	17.673	0.038	0.013	-0.303	0.04	0.013	24.884	0.207	0.069	-0.301	0.196	0.065	140.287	1.347	0.449	106.341	1.312	0.437	-1.133	0.011	0.004
R357	2017-06-13 12:19 PDT	CO2 clumped	OK	FALSE	Evap DI+CM UH 6/7/17 DU		Chewbacca	Unheated gas	CO2	2017-03-03 00:00:00 PST		9	9	-38.12	0	0	1.34	0.01	0	32.25	0.01	0	-32.147	0.002	0.001	12.604	0.007	0.002	-21.249	0.057	0.019	-0.06	0.056	0.019	25.07	0.141	0.047	-0.29	0.129	0.043	151.677	4.802	1.601	163.548	4.867	1.622	-1.246	0.026	0.009
R358	2017-06-13 14:28 PDT	CO2 clumped	OK	FALSE	ETH-1		Chewbacca	ETH-1-1	Calcite	2017-03-03 00:00:00 PST	90	9	9	1.99	0	0	5.41	0.01	0	36.44	0.01	0	5.613	0.003	0.001	16.799	0.007	0.002	21.844	0.032	0.011	-0.545	0.029	0.01	33.842	0.165	0.055	-0.037	0.157	0.052	140.478	1.589	0.53	97.181	1.53	0.51	-1.157	0.01	0.003
R359	2017-06-13 20:49 PDT	CO2 clumped	OK	FALSE	ETH-2		Chewbacca	ETH-2-1	Calcite	2017-03-03 00:00:00 PST	90	9	9	-10.07	0	0	-10.93	0.01	0	19.59	0.01	0	-6.262	0.003	0.001	0.26	0.006	0.002	-6.888	0.039	0.013	-0.686	0.036	0.012	-1.365	0.134	0.045	-1.884	0.131	0.044	150.714	2.957	0.986	157.851	2.98	0.993	-1.241	0.018	0.006
R360	2017-06-14 11:40 PDT	CO2 clumped	OK	FALSE	Bonedry DI UH 5/10/17 GJ		Chewbacca	Unheated gas	CO2	2017-03-03 00:00:00 PST		9	9	-37.58	0	0	-3.98	0.01	0	26.76	0.01	0	-31.825	0.003	0.001	7.229	0.005	0.002	-26.066	0.025	0.008	-0.109	0.027	0.009	13.634	0.196	0.065	-0.864	0.195	0.065	146.805	3.871	1.29	170.383	3.958	1.319	-1.233	0.02	0.007
R361	2017-06-14 13:45 PDT	CO2 clumped	OK	FALSE	ETH-3		Chewbacca	ETH-3-1	Calcite	2017-03-03 00:00:00 PST	90	9	9	1.65	0	0	5.77	0.01	0	36.81	0.01	0	5.31	0.003	0.001	17.159	0.005	0.002	22.256	0.038	0.013	-0.179	0.038	0.013	34.869	0.18	0.06	0.248	0.178	0.059	134.513	1.613	0.538	91.034	1.547	0.516	-1.13	0.015	0.005
R362	2017-06-14 20:08 PDT	CO2 clumped	OK	FALSE	ETH-4		Chewbacca	ETH-4-1	Calcite	2017-03-03 00:00:00 PST	90	9	9	-10.18	0	0	-11.15	0.01	0	19.36	0.01	0	-6.378	0.002	0.001	0.036	0.005	0.002	-7.012	0.036	0.012	-0.471	0.036	0.012	-1.73	0.226	0.075	-1.802	0.23	0.077	145.471	2.267	0.756	153.226	2.287	0.762	-1.217	0.014	0.005
R363	2017-06-15 11:57 PDT	CO2 clumped	OK	FALSE	Bonedry DI H 3.24.17 DU		Chewbacca	Heated Gas	CO2	2017-03-03 00:00:00 PST		9	9	-38.44	0	0	-3.03	0.01	0	27.74	0.01	0	-32.603	0.003	0.001	8.187	0.005	0.002	-26.722	0.041	0.014	-0.886	0.038	0.013	15.331	0.222	0.074	-1.092	0.225	0.075	148.223	5.516	1.839	170.65	5.623	1.874	-1.262	0.025	0.008
R364	2017-06-15 14:00 PDT	CO2 clumped	OK	FALSE	Veinstrom		Chewbacca	Veinstrom	Calcite	2017-03-03 00:00:00 PST	90	9	9	-6.16	0	0	-5.03	0	0	25.68	0	0	-2.396	0.004	0.001	6.236	0.004	0.001	3.402	0.041	0.014	-0.242	0.042	0.014	11.574	0.175	0.058	-0.925	0.173	0.058	141.026	3.064	1.021	130.056	3.042	1.014	-1.212	0.021	0.007
R365	2017-06-15 20:25 PDT	CO2 clumped	OK	FALSE	Carmel Chalk		Chewbacca	Carmel Chalk	Calcite	2017-03-03 00:00:00 PST	90	9	9	-2.23	0	0	3.61	0	0	34.58	0.01	0	1.594	0.003	0.001	14.969	0.005	0.002	16.128	0.035	0.012	-0.252	0.034	0.011	30.084	0.141	0.047	-0.076	0.136	0.045	135.071	1.874	0.625	100.538	1.82	0.607	-1.158	0.013	0.004
R366	2017-06-16 11:27 PDT	CO2 clumped	OK	FALSE	Evap DI+CM H 6-13-17 DU		Chewbacca	Heated Gas	CO2	2017-03-03 00:00:00 PST		9	9	2.95	0	0	-3.76	0	0	26.99	0	0	6.192	0.003	0.001	7.539	0.003	0.001	13.083	0.035	0.012	-0.754	0.036	0.012	14.087	0.113	0.038	-1.032	0.11	0.037	132.609	2.266	0.755	108.699	2.22	0.74	-1.164	0.019	0.006
R367	2017-06-16 13:30 PDT	CO2 clumped	OK	FALSE	Carrara Marble		Chewbacca	Carrara Marble	Calcite	2017-03-03 00:00:00 PST	90	9	9	1.95	0	0	6.03	0	0	37.08	0	0	5.595	0.002	0.001	17.425	0.004	0.001	22.543	0.026	0.009	-0.447	0.026	0.009	35.458	0.182	0.061	0.295	0.175	0.058	127.621	1.662	0.554	83.523	1.599	0.533	-1.119	0.014	0.005
R368	2017-06-17 11:47 PDT	CO2 clumped	OK	FALSE	Evap DI+CM UH 6.15.17 GJ		Chewbacca	Unheated gas	CO2	2017-03-03 00:00:00 PST		9	9	1.66	0	0	-5.62	0.01	0	25.06	0.01	0	4.918	0.003	0.001	5.649	0.007	0.002	10.673	0.036	0.012	0.017	0.037	0.012	10.499	0.316	0.105	-0.822	0.307	0.102	142.351	2.38	0.793	123.885	2.346	0.782	-1.209	0.017	0.006
R369	2017-06-17 13:54 PDT	CO2 clumped	OK	FALSE	ETH-1		Chewbacca	ETH-1-1	Calcite	2017-03-03 00:00:00 PST	90	9	9	1.98	0	0	5.44	0.01	0	36.46	0.01	0	5.601	0.002	0.001	16.823	0.008	0.003	21.826	0.042	0.014	-0.574	0.037	0.012	34.069	0.214	0.071	0.135	0.204	0.068	139.554	1.623	0.541	96.256	1.57	0.523	-1.179	0.011	0.004
R370	2017-06-18 12:37 PDT	CO2 clumped	OK	FALSE	Bonedry DI UH 6-6-17 GJ		Chewbacca	Unheated gas	CO2	2017-03-03 00:00:00 PST		9	9	-37.44	0	0	2.31	0	0	33.25	0	0	-31.478	0.004	0.001	13.585	0.002	0.001	-19.625	0.05	0.017	-0.067	0.051	0.017	27.344	0.202	0.067	-0.01	0.194	0.065	141.571	3.825	1.275	150.299	3.86	1.287	-1.202	0.024	0.008
R371	2017-06-18 14:44 PDT	CO2 clumped	OK	FALSE	ETH-3		Chewbacca	ETH-3-1	Calcite	2017-03-03 00:00:00 PST	90	9	9	1.64	0	0	5.81	0	0	36.85	0	0	5.298	0.003	0.001	17.201	0.004	0.001	22.273	0.034	0.011	-0.191	0.037	0.012	35.158	0.213	0.071	0.445	0.206	0.069	129.091	2.184	0.728	85.746	2.094	0.698	-1.117	0.016	0.005
R372	2017-06-18 23:17 PDT	CO2 clumped	OK	FALSE	ETH-4		Chewbacca	ETH-4-1	Calcite	2017-03-03 00:00:00 PST	90	9	9	-10.19	0	0	-11.17	0.01	0	19.34	0.01	0	-6.383	0.002	0.001	0.017	0.005	0.002	-7.037	0.022	0.007	-0.472	0.025	0.008	-1.794	0.206	0.069	-1.828	0.207	0.069	139.864	1.324	0.441	147.63	1.342	0.447	-1.199	0.009	0.003
R373	2017-06-19 12:20 PDT	CO2 clumped	OK	FALSE	Bonedry DI H 4.4.17 NH		Chewbacca	Heated Gas	CO2	2017-03-03 00:00:00 PST		9	9	-37.43	0	0	-6.48	0.01	0	24.18	0.01	0	-31.769	0.003	0.001	4.698	0.006	0.002	-29.188	0.048	0.016	-0.907	0.054	0.018	8.095	0.194	0.065	-1.311	0.196	0.065	144.967	5.436	1.812	174.222	5.583	1.861	-1.259	0.025	0.008
R374	2017-06-19 14:24 PDT	CO2 clumped	OK	FALSE	TV03		Chewbacca	TV03	Calcite	2017-03-03 00:00:00 PST	90	9	9	2.5	0	0	-0.71	0	0	30.13	0	0	5.875	0.002	0.001	10.613	0.003	0.001	16.364	0.035	0.012	-0.191	0.035	0.012	21.036	0.118	0.039	-0.295	0.115	0.038	129.817	2.654	0.885	99.734	2.585	0.862	-1.151	0.019	0.006
R375	2017-06-19 21:00 PDT	CO2 clumped	OK	FALSE	Veinstrom		Chewbacca	Veinstrom	Calcite	2017-03-03 00:00:00 PST	90	9	9	-6.2	0	0	-4.96	0	0	25.75	0	0	-2.426	0.002	0.001	6.302	0.004	0.001	3.434	0.05	0.017	-0.243	0.049	0.016	11.653	0.186	0.062	-0.979	0.18	0.06	135.303	3.281	1.094	124.279	3.247	1.082	-1.198	0.028	0.009
R376	2017-06-20 12:29 PDT	CO2 clumped	OK	FALSE	Evap DI + CM H 6.13.17 GJ		Chewbacca	Heated Gas	CO2	2017-03-03 00:00:00 PST		9	9	3.34	0	0	-2.96	0.01	0	27.81	0.01	0	6.594	0.002	0.001	8.343	0.006	0.002	14.329	0.03	0.01	-0.721	0.026	0.009	15.598	0.241	0.08	-1.137	0.231	0.077	142.771	6.941	2.314	116.42	6.789	2.263	-1.257	0.034	0.011
R377	2017-06-20 14:31 PDT	CO2 clumped	OK	FALSE	Carmel Chalk		Chewbacca	Carmel Chalk	Calcite	2017-03-03 00:00:00 PST	90	9	9	-2.23	0	0	3.62	0	0	34.6	0	0	1.591	0.003	0.001	14.983	0.004	0.001	16.185	0.04	0.013	-0.207	0.038	0.013	30.224	0.226	0.075	0.031	0.22	0.073	135.033	1.817	0.606	100.474	1.765	0.588	-1.205	0.011	0.004
R378	2017-06-21 12:32 PDT	CO2 clumped	OK	FALSE	Evap DI + CM UH 6.15.17 GJ		Chewbacca	Unheated gas	CO2	2017-03-03 00:00:00 PST		9	9	1.9	0	0	-5.21	0	0	25.48	0	0	5.16	0.001	0	6.063	0.005	0.002	11.347	0.039	0.013	0.031	0.039	0.013	11.062	0.199	0.066	-1.087	0.191	0.064	146.031	7.362	2.454	126.306	7.236	2.412	-1.266	0.038	0.013
R379	2017-06-21 14:42 PDT	CO2 clumped	OK	FALSE	8544 NBS19 Limestone		Chewbacca	NBS 19	Calcite	2017-03-03 00:00:00 PST	90	9	9	1.88	0	0	5.45	0	0	36.47	0	0	5.51	0.002	0.001	16.833	0.005	0.002	21.89	0.037	0.012	-0.427	0.034	0.011	34.196	0.183	0.061	0.238	0.179	0.06	134.739	3.368	1.123	91.708	3.247	1.082	-1.197	0.025	0.008
R380	2017-06-22 12:37 PDT	CO2 clumped	OK	FALSE	Bonedry DI UH 6.6.17 GJ		Chewbacca	Unheated gas	CO2	2017-03-03 00:00:00 PST		9	9	-37.55	0	0	2.06	0.01	0	32.99	0.01	0	-31.585	0.003	0.001	13.331	0.007	0.002	-20.01	0.042	0.014	-0.1	0.041	0.014	26.759	0.302	0.101	-0.078	0.286	0.095	138.497	3.893	1.298	147.902	3.919	1.306	-1.24	0.018	0.006
R381	2017-06-22 14:44 PDT	CO2 clumped	OK	FALSE	8544 NBS19 Limestone		Chewbacca	NBS 19	Calcite	2017-03-03 00:00:00 PST	90	9	9	1.83	0	0	5.43	0	0	36.45	0	0	5.463	0.002	0.001	16.812	0.004	0.001	21.782	0.041	0.014	-0.465	0.044	0.015	34.215	0.167	0.056	0.298	0.164	0.055	126.494	2.894	0.965	83.872	2.786	0.929	-1.142	0.024	0.008
R382	2017-06-22 21:04 PDT	CO2 clumped	OK	FALSE	88B Dolomitic Limestone		Chewbacca	SRM 88B	Dolomite	2017-03-03 00:00:00 PST	90	9	9	1.92	0	0	1.11	0	0	32.01	0	0	5.395	0.003	0.001	12.457	0.003	0.001	17.596	0.045	0.015	-0.28	0.042	0.014	24.802	0.234	0.078	-0.261	0.226	0.075	126.774	2.147	0.716	93.404	2.088	0.696	-1.137	0.017	0.006
R383	2017-06-23 11:56 PDT	CO2 clumped	OK	FALSE	Bonedry DI H 6.6.17 DU		Chewbacca	Heated Gas	CO2	2017-03-03 00:00:00 PST		9	9	-37.43	0	0	0.26	0	0	31.12	0.01	0	-31.543	0.003	0.001	11.507	0.005	0.002	-22.47	0.042	0.014	-0.888	0.042	0.014	22.432	0.251	0.084	-0.698	0.245	0.082	143.059	4.946	1.649	156.532	5.005	1.668	-1.263	0.031	0.01
R384	2017-06-23 14:03 PDT	CO2 clumped	OK	FALSE	ETH-1		Chewbacca	ETH-1-1	Calcite	2017-03-03 00:00:00 PST	90	9	9	1.97	0	0	5.43	0	0	36.46	0.01	0	5.598	0.003	0.001	16.819	0.005	0.002	21.848	0.038	0.013	-0.545	0.038	0.013	34.121	0.158	0.053	0.194	0.155	0.052	132.345	1.993	0.664	89.332	1.927	0.642	-1.183	0.012	0.004
R385	2017-06-24 13:51 PDT	CO2 clumped	OK	FALSE	Evap DI+CM H 6.13.17 DU		Chewbacca	Heated Gas	CO2	2017-03-03 00:00:00 PST		9	9	2.08	0	0	-5.29	0	0	25.41	0	0	5.332	0.002	0.001	5.99	0.004	0.001	10.662	0.04	0.013	-0.751	0.038	0.013	10.794	0.189	0.063	-1.207	0.186	0.062	141.174	4.664	1.555	121.487	4.582	1.527	-1.248	0.024	0.008
R386	2017-06-24 15:57 PDT	CO2 clumped	OK	FALSE	Carmel Chalk		Chewbacca	Carmel Chalk	Calcite	2017-03-03 00:00:00 PST	90	9	9	-2.23	0	0	3.67	0	0	34.64	0	0	1.59	0.002	0.001	15.031	0.005	0.002	16.202	0.046	0.015	-0.236	0.044	0.015	30.308	0.193	0.064	0.02	0.192	0.064	132.947	2.185	0.728	98.352	2.124	0.708	-1.188	0.019	0.006
R387	2017-06-24 22:13 PDT	CO2 clumped	OK	FALSE	Carrara Marble		Chewbacca	Carrara Marble	Calcite	2017-03-03 00:00:00 PST	90	9	9	1.96	0	0	6.15	0	0	37.2	0	0	5.607	0.003	0.001	17.549	0.005	0.002	22.682	0.033	0.011	-0.444	0.034	0.011	35.988	0.299	0.1	0.562	0.294	0.098	127.589	1.674	0.558	83.218	1.61	0.537	-1.15	0.012	0.004
R388	2017-06-25 12:06 PDT	CO2 clumped	OK	FALSE	Evap DI+CM UH 6.15.17 DU		Chewbacca	Unheated gas	CO2	2017-03-03 00:00:00 PST		9	9	2.13	0	0	-5.1	0	0	25.6	0	0	5.383	0.004	0.001	6.177	0.004	0.001	11.717	0.015	0.005	0.057	0.019	0.006	11.473	0.201	0.067	-0.907	0.196	0.065	130.155	3.159	1.053	110.194	3.091	1.03	-1.179	0.014	0.005
R389	2017-06-25 14:10 PDT	CO2 clumped	OK	FALSE	Veinstrom		Chewbacca	Veinstrom	Calcite	2017-03-03 00:00:00 PST	90	9	9	-6.3	0	0	-5.16	0.01	0	25.54	0.01	0	-2.531	0.002	0.001	6.096	0.006	0.002	3.094	0.062	0.021	-0.272	0.062	0.021	11.349	0.138	0.046	-0.87	0.139	0.046	128.83	2.32	0.773	118.444	2.3	0.767	-1.173	0.019	0.006
R390	2017-06-25 22:29 PDT	CO2 clumped	OK	FALSE	ETH-3		Chewbacca	ETH-3-1	Calcite	2017-03-03 00:00:00 PST	90	9	9	1.55	0	0	5.64	0.01	0	36.67	0.01	0	5.211	0.004	0.001	17.026	0.007	0.002	22.038	0.027	0.009	-0.162	0.025	0.008	34.907	0.151	0.05	0.547	0.141	0.047	125.405	2.019	0.673	82.667	1.952	0.651	-1.131	0.015	0.005
R391	2017-06-26 12:18 PDT	CO2 clumped	OK	FALSE	Bonedry DI UH 6.19.17 GJ		Chewbacca	Unheated gas	CO2	2017-03-03 00:00:00 PST		9	9	-37.48	0	0	2.16	0.01	0	33.09	0.01	0	-31.522	0.003	0.001	13.429	0.005	0.002	-19.832	0.043	0.014	-0.082	0.041	0.014	27.171	0.279	0.093	0.129	0.277	0.092	134.887	5.766	1.922	143.964	5.808	1.936	-1.217	0.033	0.011
R392	2017-06-26 14:30 PDT	CO2 clumped	OK	FALSE	Veinstrom		Chewbacca	Veinstrom	Calcite	2017-03-03 00:00:00 PST	90	9	9	-6.19	0	0	-4.93	0.01	0	25.78	0.01	0	-2.422	0.002	0.001	6.335	0.005	0.002	3.462	0.046	0.015	-0.251	0.045	0.015	11.861	0.183	0.061	-0.838	0.184	0.061	127.853	2.803	0.934	116.825	2.777	0.926	-1.172	0.021	0.007
R393	2017-06-26 20:47 PDT	CO2 clumped	OK	FALSE	88B Dolomitic Limestone		Chewbacca	SRM 88B	Dolomite	2017-03-03 00:00:00 PST	90	9	9	1.91	0	0	1.18	0.01	0	32.08	0.01	0	5.393	0.002	0.001	12.526	0.006	0.002	17.657	0.046	0.015	-0.285	0.047	0.016	25.019	0.133	0.044	-0.184	0.123	0.041	123.586	2.117	0.706	90.168	2.055	0.685	-1.129	0.018	0.006
R394	2017-06-27 16:57 PDT	CO2 clumped	OK	FALSE	Bonedry DI H 4.7.17 NH		Chewbacca	Heated Gas	CO2	2017-03-03 00:00:00 PST		10	8	-37.7	0	0	-6.97	0.01	0	23.68	0.01	0	-32.044	0.003	0.001	4.209	0.007	0.002	-29.924	0.023	0.008	-0.893	0.028	0.01	7.026	0.216	0.077	-1.398	0.211	0.075	132.235	1.689	0.597	162.629	1.743	0.616	-1.227	0.014	0.005
R395	2017-06-27 19:45 PDT	CO2 clumped	OK	FALSE	88B Dolomitic Limestone		Chewbacca	SRM 88B	Dolomite	2017-03-03 00:00:00 PST	90	9	8	2.01	0	0	1.1	0.01	0	31.99	0.01	0	5.478	0.002	0.001	12.442	0.007	0.003	17.642	0.028	0.01	-0.305	0.028	0.01	24.997	0.184	0.065	-0.042	0.177	0.063	122.286	2.643	0.934	88.985	2.554	0.903	-1.121	0.022	0.008
R396	2017-06-27 22:03 PDT	CO2 clumped	OK	FALSE	ETH-3		Chewbacca	ETH-3-1	Calcite	2017-03-03 00:00:00 PST	90	9	8	1.71	0	0	5.77	0	0	36.81	0	0	5.361	0.002	0.001	17.163	0.004	0.001	22.337	0.031	0.011	-0.156	0.03	0.011	35.216	0.204	0.072	0.576	0.196	0.069	122.554	2.35	0.831	79.467	2.254	0.797	-1.114	0.017	0.006
R397	2017-06-28 00:14 PDT	CO2 clumped	OK	FALSE	ETH-4		Chewbacca	ETH-4-1	Calcite	2017-03-03 00:00:00 PST	90	9	8	-10.15	0	0	-11.15	0.01	0	19.37	0.01	0	-6.347	0.003	0.001	0.044	0.007	0.002	-6.944	0.068	0.024	-0.443	0.065	0.023	-1.689	0.213	0.075	-1.777	0.212	0.075	131.376	2.389	0.845	138.979	2.406	0.851	-1.206	0.02	0.007
R398	2017-06-28 02:34 PDT	CO2 clumped	OK	FALSE	Carrara Marble-UCLA		Chewbacca	Carrara Marble	Calcite	2017-03-03 00:00:00 PST	90	9	8	2.03	0	0	6.12	0	0	37.17	0	0	5.678	0.002	0.001	17.515	0.005	0.002	22.714	0.05	0.018	-0.452	0.048	0.017	35.813	0.235	0.083	0.46	0.227	0.08	121.948	1.678	0.593	77.789	1.615	0.571	-1.115	0.015	0.005
R399	2017-06-28 12:19 PDT	CO2 clumped	OK	FALSE	Bonedry DI H GJ 5/10/17		Chewbacca	Heated Gas	CO2	2017-03-03 00:00:00 PST		9	9	-38.04	0	0	-6.12	0	0	24.55	0	0	-32.335	0.002	0.001	5.06	0.004	0.001	-29.472	0.044	0.015	-0.95	0.048	0.016	8.937	0.217	0.072	-1.197	0.214	0.071	127.216	2.115	0.705	155.922	2.173	0.724	-1.213	0.019	0.006
R400	2017-06-28 14:30 PDT	CO2 clumped	OK	FALSE	Carmel Chalk		Chewbacca	Carmel Chalk	Calcite	2017-03-03 00:00:00 PST	90	9	9	-2.21	0	0	3.57	0.01	0	34.54	0.01	0	1.608	0.001	0	14.931	0.005	0.002	16.144	0.034	0.011	-0.214	0.034	0.011	30.571	0.192	0.064	0.472	0.185	0.062	118.922	1.867	0.622	84.945	1.814	0.605	-1.134	0.013	0.004
R401	2017-06-28 21:20 PDT	CO2 clumped	OK	FALSE	ETH-2		Chewbacca	ETH-2-1	Calcite	2017-03-03 00:00:00 PST	90	9	9	-10.13	0	0	-11.13	0.01	0	19.38	0.01	0	-6.333	0.003	0.001	0.058	0.005	0.002	-7.132	0.073	0.024	-0.661	0.071	0.024	-1.75	0.185	0.062	-1.865	0.182	0.061	125.225	0.896	0.299	132.739	0.898	0.299	-1.194	0.008	0.003
R402	2017-06-29 10:50 PDT	CO2 clumped	OK	FALSE	EvapDI+CM H 6.15.17 DU		Chewbacca	Heated Gas	CO2	2017-03-03 00:00:00 PST		9	9	2.22	0	0	-5.97	0.01	0	24.71	0.01	0	5.433	0.002	0.001	5.303	0.007	0.002	10.092	0.035	0.012	-0.748	0.038	0.013	9.423	0.2	0.067	-1.198	0.192	0.064	122.341	1.575	0.525	104.343	1.558	0.519	-1.187	0.014	0.005
R403	2017-06-29 19:15 PDT	CO2 clumped	OK	FALSE	88B dolomitic limestone		Chewbacca	SRM 88B	Dolomite	2017-03-03 00:00:00 PST	90	9	9	1.86	0	0	0.82	0.01	0	31.71	0.01	0	5.332	0.003	0.001	12.161	0.008	0.003	17.225	0.026	0.009	-0.292	0.025	0.008	24.416	0.211	0.07	-0.053	0.216	0.072	119.482	2.171	0.724	87.026	2.111	0.704	-1.145	0.02	0.007
R404	2017-06-30 11:56 PDT	CO2 clumped	OK	FALSE	EvapDI+CM H 6.15.17 DU		Chewbacca	Unheated gas	CO2	2017-03-03 00:00:00 PST		9	9	1.58	0	0	-1.44	0	0	29.37	0	0	4.994	0.003	0.001	9.871	0.003	0.001	14.989	0.044	0.015	0.081	0.042	0.014	19.473	0.193	0.064	-0.359	0.189	0.063	127.419	5.767	1.922	100.01	5.633	1.878	-1.19	0.028	0.009
R405	2017-06-30 14:00 PDT	CO2 clumped	OK	FALSE	Carrara Marble - UCLA		Chewbacca	Carrara Marble	Calcite	2017-03-03 00:00:00 PST	90	9	9	2.01	0	0	6.06	0.01	0	37.1	0.01	0	5.657	0.002	0.001	17.451	0.008	0.003	22.649	0.038	0.013	-0.433	0.036	0.012	35.929	0.202	0.067	0.698	0.192	0.064	119.381	2.167	0.722	75.479	2.082	0.694	-1.133	0.017	0.006
R406	2017-06-30 20:09 PDT	CO2 clumped	OK	FALSE	Carmel Chalk		Chewbacca	Carmel Chalk	Calcite	2017-03-03 00:00:00 PST	90	9	9	-2.19	0	0	3.61	0.01	0	34.59	0.01	0	1.627	0.002	0.001	14.975	0.006	0.002	16.21	0.017	0.006	-0.211	0.017	0.006	30.549	0.124	0.041	0.364	0.127	0.042	120.078	1.257	0.419	85.952	1.213	0.404	-1.142	0.01	0.003
R407	2017-07-01 12:01 PDT	CO2 clumped	OK	FALSE	Bonedry DI H 4.7.17 NH		Chewbacca	Heated Gas	CO2	2017-03-03 00:00:00 PST		9	9	-37.45	0	0	-5.38	0.01	0	25.31	0.01	0	-31.749	0.003	0.001	5.811	0.006	0.002	-28.15	0.033	0.011	-0.947	0.034	0.011	10.431	0.267	0.089	-1.21	0.262	0.087	129.555	1.695	0.565	155.876	1.742	0.581	-1.265	0.015	0.005
R408	2017-07-01 14:04 PDT	CO2 clumped	OK	FALSE	Carmel Chalk		Chewbacca	Carmel Chalk	Calcite	2017-03-03 00:00:00 PST	90	9	9	-2.18	0	0	3.58	0.01	0	34.55	0.01	0	1.636	0.003	0.001	14.939	0.006	0.002	16.154	0.029	0.01	-0.241	0.033	0.011	30.407	0.242	0.081	0.296	0.234	0.078	121.445	2.73	0.91	87.342	2.653	0.884	-1.174	0.023	0.008
R409	2017-07-01 22:23 PDT	CO2 clumped	OK	FALSE	ETH-1		Chewbacca	ETH-1-1	Calcite	2017-03-03 00:00:00 PST	90	9	9	2.03	0	0	5.41	0.01	0	36.44	0.01	0	5.65	0.003	0.001	16.796	0.006	0.002	21.873	0.03	0.01	-0.552	0.026	0.009	34.526	0.148	0.049	0.63	0.143	0.048	122.031	2.71	0.903	79.398	2.615	0.872	-1.167	0.023	0.008
R410	2017-07-02 23:45 PDT	CO2 clumped	OK	FALSE	Veinstrom		Chewbacca	Veinstrom	Calcite	2017-03-03 00:00:00 PST	90	9	9	-6.09	0	0	-4.97	0	0	25.74	0	0	-2.329	0.002	0.001	6.296	0.003	0.001	3.513	0.047	0.016	-0.259	0.048	0.016	11.964	0.165	0.055	-0.659	0.163	0.054	131.709	1.812	0.604	120.617	1.798	0.599	-1.255	0.017	0.006
R411	2017-07-03 12:37 PDT	CO2 clumped	OK	FALSE	Evap DI CM UH 6.28.17 DU		Chewbacca	Unheated gas	CO2	2017-03-03 00:00:00 PST		9	9	1.08	0	0	-2.43	0	0	28.36	0	0	4.488	0.002	0.001	8.878	0.005	0.002	13.497	0.034	0.011	0.097	0.032	0.011	17.336	0.175	0.058	-0.489	0.173	0.058	124.414	5.369	1.79	99.792	5.257	1.752	-1.197	0.03	0.01
R412	2017-07-03 14:41 PDT	CO2 clumped	OK	FALSE	ETH-3		Chewbacca	ETH-3-1	Calcite	2017-03-03 00:00:00 PST	90	9	9	1.78	0	0	5.71	0.01	0	36.75	0.01	0	5.422	0.001	0	17.1	0.006	0.002	22.313	0.05	0.017	-0.182	0.047	0.016	35.091	0.158	0.053	0.579	0.159	0.053	117.442	2.776	0.925	74.612	2.672	0.891	-1.142	0.025	0.008
R413	2017-07-03 22:54 PDT	CO2 clumped	OK	FALSE	Carrera Marble-UCLA		Chewbacca	Carrara Marble	Calcite	2017-03-03 00:00:00 PST	90	9	9	2.08	0	0	6.09	0.01	0	37.14	0.01	0	5.721	0.004	0.001	17.482	0.007	0.002	22.732	0.03	0.01	-0.448	0.026	0.009	36.228	0.129	0.043	0.926	0.122	0.041	116.102	2.314	0.771	72.191	2.235	0.745	-1.137	0.019	0.006
R414	2017-07-05 14:36 PDT	CO2 clumped	OK	FALSE	EvapDI+CM H 5.86 5.17.17 DU		Chewbacca	Heated Gas	CO2	2017-03-03 00:00:00 PST		9	9	1.51	0	0	3.09	0.01	0	34.04	0.01	0	5.079	0.004	0.001	14.451	0.01	0.003	18.83	0.039	0.013	-0.677	0.035	0.012	29.012	0.337	0.112	-0.096	0.31	0.103	125.225	3.1	1.033	88.052	2.98	0.993	-1.153	0.018	0.006
R415	2017-07-05 16:49 PDT	CO2 clumped	OK	FALSE	carmel chalk		Chewbacca	Carmel Chalk	Calcite	2017-03-03 00:00:00 PST	90	9	9	-2.23	0	0	3.59	0.01	0	34.56	0.01	0	1.592	0.002	0.001	14.951	0.005	0.002	16.127	0.045	0.015	-0.233	0.048	0.016	30.519	0.101	0.034	0.382	0.099	0.033	118.859	3.189	1.063	84.861	3.093	1.031	-1.121	0.026	0.009
R416	2017-07-06 16:43 PDT	CO2 clumped	OK	FALSE	Bonedry DI H 6.7.17 GJ		Chewbacca	Heated Gas	CO2	2017-03-03 00:00:00 PST		9	9	-38.11	0	0	-0.87	0.01	0	29.96	0.01	0	-32.218	0.003	0.001	10.368	0.006	0.002	-24.298	0.043	0.014	-0.933	0.042	0.014	20.345	0.212	0.071	-0.489	0.212	0.071	127.978	2.686	0.895	144.653	2.734	0.911	-1.259	0.023	0.008
R417	2017-07-06 18:48 PDT	CO2 clumped	OK	FALSE	Carrara Marble		Chewbacca	Carrara Marble	Calcite	2017-03-03 00:00:00 PST	90	9	9	1.98	0	0	6.06	0.01	0	37.1	0.01	0	5.629	0.002	0.001	17.45	0.005	0.002	22.622	0.045	0.015	-0.431	0.044	0.015	35.807	0.196	0.065	0.581	0.187	0.062	120.049	2.037	0.679	76.154	1.961	0.654	-1.169	0.018	0.006
R418	2017-07-07 01:03 PDT	CO2 clumped	OK	FALSE	ETH-1		Chewbacca	ETH-1-1	Calcite	2017-03-03 00:00:00 PST	90	9	9	2.03	0	0	5.47	0.01	0	36.5	0.01	0	5.65	0.002	0.001	16.863	0.006	0.002	21.924	0.041	0.014	-0.567	0.039	0.013	34.746	0.101	0.034	0.712	0.101	0.034	119.844	1.635	0.545	77.155	1.573	0.524	-1.165	0.016	0.005
R419	2017-07-07 11:57 PDT	CO2 clumped	OK	FALSE	Bonedry DI UH 7.6.17 NH		Chewbacca	Unheated gas	CO2	2017-03-03 00:00:00 PST		9	9	-37.35	0	0	-3.6	0	0	27.15	0	0	-31.598	0.003	0.001	7.609	0.001	0	-25.528	0.049	0.016	-0.169	0.049	0.016	14.605	0.09	0.03	-0.661	0.089	0.03	134.217	2.996	0.999	156.39	3.056	1.019	-1.286	0.01	0.003
R420	2017-07-07 14:01 PDT	CO2 clumped	OK	FALSE	Carmel Chalk		Chewbacca	Carmel Chalk	Calcite	2017-03-03 00:00:00 PST	90	9	9	-2.23	0	0	3.68	0.01	0	34.65	0.01	0	1.595	0.002	0.001	15.036	0.006	0.002	16.232	0.051	0.017	-0.216	0.053	0.018	30.758	0.129	0.043	0.446	0.124	0.041	119.939	2.135	0.712	85.724	2.078	0.693	-1.175	0.018	0.006
R421	2017-07-07 20:17 PDT	CO2 clumped	OK	FALSE	ETH-2		Chewbacca	ETH-2-1	Calcite	2017-03-03 00:00:00 PST	90	9	9	-10.11	0	0	-11.03	0.01	0	19.49	0.01	0	-6.303	0.002	0.001	0.159	0.006	0.002	-7.052	0.038	0.013	-0.709	0.039	0.013	-1.433	0.136	0.045	-1.749	0.137	0.046	126.244	1.931	0.644	133.505	1.944	0.648	-1.234	0.016	0.005
R422	2017-07-08 10:59 PDT	CO2 clumped	OK	FALSE	Evap DI + UH GJ 6-28-17		Chewbacca	Unheated gas	CO2	2017-03-03 00:00:00 PST		9	9	0.94	0	0	-2.7	0.01	0	28.08	0.01	0	4.349	0.003	0.001	8.603	0.006	0.002	13.094	0.031	0.01	0.11	0.03	0.01	17.234	0.144	0.048	-0.045	0.142	0.047	115.28	1.903	0.634	91.603	1.868	0.623	-1.148	0.022	0.007
R423	2017-07-08 13:07 PDT	CO2 clumped	OK	FALSE	ETH-3		Chewbacca	ETH-3-1	Calcite	2017-03-03 00:00:00 PST	90	9	9	1.68	0	0	5.81	0.01	0	36.85	0.01	0	5.333	0.003	0.001	17.203	0.006	0.002	22.37	0.064	0.021	-0.133	0.064	0.021	35.675	0.127	0.042	0.941	0.123	0.041	113.552	1.976	0.659	70.759	1.908	0.636	-1.119	0.018	0.006
R424	2017-07-08 21:25 PDT	CO2 clumped	OK	FALSE	ETH-4		Chewbacca	ETH-4-1	Calcite	2017-03-03 00:00:00 PST	90	9	9	-10.13	0	0	-11.08	0	0	19.44	0	0	-6.324	0.003	0.001	0.11	0.004	0.001	-6.878	0.051	0.017	-0.465	0.05	0.017	-1.25	0.218	0.073	-1.47	0.216	0.072	117.894	1.401	0.467	125.234	1.414	0.471	-1.17	0.009	0.003
R425	2017-07-09 15:18 PDT	CO2 clumped	OK	FALSE	EvapDI+CM U DU6-15		Chewbacca	Unheated gas	CO2	2017-03-03 00:00:00 PST		9	9	1.82	0	0	-5.43	0.01	0	25.27	0.01	0	5.079	0.002	0.001	5.848	0.006	0.002	11.091	0.043	0.014	0.071	0.045	0.015	10.77	0.231	0.077	-0.949	0.234	0.078	116.789	1.745	0.582	98.122	1.72	0.573	-1.16	0.019	0.006
R426	2017-07-09 19:29 PDT	CO2 clumped	OK	FALSE	Carrera Marble - UCLA		Chewbacca	Carrara Marble	Calcite	2017-03-03 00:00:00 PST	90	9	9	2.01	0	0	6.17	0.01	0	37.23	0.01	0	5.657	0.002	0.001	17.57	0.006	0.002	22.749	0.033	0.011	-0.45	0.03	0.01	36.262	0.16	0.053	0.786	0.152	0.051	111.142	1.826	0.609	67.318	1.764	0.588	-1.101	0.016	0.005
R427	2017-07-10 12:33 PDT	CO2 clumped	OK	FALSE	Evap DI + CM H 6.26.17 DU		Chewbacca	Heated Gas	CO2	2017-03-03 00:00:00 PST		9	9	3.32	0	0	-4.43	0	0	26.29	0	0	6.519	0.002	0.001	6.854	0.003	0.001	12.745	0.048	0.016	-0.754	0.051	0.017	12.717	0.186	0.062	-1.023	0.18	0.06	119.344	1.091	0.364	96.8	1.066	0.355	-1.187	0.01	0.003
R428	2017-07-10 14:34 PDT	CO2 clumped	OK	FALSE	SRM 88B Dolomitic Limestone		Chewbacca	SRM 88B	Dolomite	2017-03-03 00:00:00 PST	90	9	9	1.94	0	0	1.13	0.01	0	32.02	0.01	0	5.421	0.003	0.001	12.47	0.008	0.003	17.671	0.03	0.01	-0.245	0.027	0.009	25.108	0.153	0.051	0.012	0.146	0.049	120.077	1.706	0.569	86.85	1.654	0.551	-1.171	0.016	0.005
R429	2017-07-10 20:47 PDT	CO2 clumped	OK	FALSE	ETH-1		Chewbacca	ETH-1-1	Calcite	2017-03-03 00:00:00 PST	90	9	9	2.07	0	0	5.61	0.01	0	36.64	0.01	0	5.697	0.002	0.001	17.001	0.007	0.002	22.117	0.036	0.012	-0.559	0.037	0.012	35.016	0.197	0.066	0.701	0.186	0.062	114.388	2.264	0.755	71.568	2.183	0.728	-1.125	0.017	0.006
R430	2017-07-11 13:06 PDT	CO2 clumped	OK	FALSE	Bonedry DI H NH 7.6.17		Chewbacca	Heated Gas	CO2	2017-03-03 00:00:00 PST		9	9	-37.35	0	0	-4.32	0	0	26.41	0	0	-31.619	0.003	0.001	6.882	0.005	0.002	-26.988	0.052	0.017	-0.937	0.051	0.017	12.716	0.129	0.043	-1.082	0.124	0.041	127.834	3.046	1.015	151.538	3.112	1.037	-1.255	0.026	0.009
R431	2017-07-11 21:28 PDT	CO2 clumped	OK	FALSE			Chewbacca	ETH-3-1	Calcite	2017-03-03 00:00:00 PST	90	9	9	1.73	0	0	5.97	0.01	0	37.01	0.01	0	5.385	0.002	0.001	17.358	0.006	0.002	22.526	0.041	0.014	-0.185	0.041	0.014	35.939	0.208	0.069	0.89	0.199	0.066	114.701	1.791	0.597	71.485	1.729	0.576	-1.134	0.015	0.005
R432	2017-07-12 12:29 PDT	CO2 clumped	OK	FALSE	Bonedry DI UH GJ 6.9.17		Chewbacca	Unheated gas	CO2	2017-03-03 00:00:00 PST		9	9	-37.52	0	0	2.16	0	0	33.09	0	0	-31.561	0.003	0.001	13.431	0.004	0.001	-19.885	0.036	0.012	-0.095	0.037	0.012	27.288	0.19	0.063	0.24	0.185	0.062	126.088	3.169	1.056	135.141	3.195	1.065	-1.236	0.014	0.005
R433	2017-07-12 14:33 PDT	CO2 clumped	OK	FALSE	ETH-4		Chewbacca	ETH-4-1	Calcite	2017-03-03 00:00:00 PST	90	9	9	-10.19	0	0	-11.21	0.01	0	19.31	0.01	0	-6.388	0.002	0.001	-0.015	0.007	0.002	-7.065	0.038	0.013	-0.464	0.038	0.013	-1.771	0.191	0.064	-1.741	0.193	0.064	122.28	2.556	0.852	130.004	2.583	0.861	-1.217	0.021	0.007
R434	2017-07-13 12:25 PDT	CO2 clumped	OK	FALSE	Evap DI+CM UH 6.28.17 DU		Chewbacca	Unheated gas	CO2	2017-03-03 00:00:00 PST		9	9	3.02	0	0	1.27	0.01	0	32.17	0.01	0	6.435	0.002	0.001	12.614	0.006	0.002	19.194	0.043	0.014	0.07	0.043	0.014	25.423	0.248	0.083	0.034	0.246	0.082	124.996	3.507	1.169	90.144	3.393	1.131	-1.212	0.023	0.008
R435	2017-07-13 14:28 PDT	CO2 clumped	OK	FALSE	Carrara Marble- UCLA		Chewbacca	Carrara Marble	Calcite	2017-03-03 00:00:00 PST	90	9	9	2.02	0	0	6.17	0	0	37.22	0	0	5.668	0.003	0.001	17.568	0.004	0.001	22.771	0.052	0.017	-0.438	0.049	0.016	36.214	0.145	0.048	0.743	0.14	0.047	119.479	2.213	0.738	75.319	2.126	0.709	-1.172	0.015	0.005
R436	2017-07-13 23:01 PDT	CO2 clumped	OK	FALSE	88B dolomitic limestone		Chewbacca	SRM 88B	Dolomite	2017-03-03 00:00:00 PST	90	9	9	1.94	0	0	1.16	0.01	0	32.05	0.01	0	5.418	0.002	0.001	12.5	0.006	0.002	17.663	0.019	0.006	-0.278	0.021	0.007	25.344	0.201	0.067	0.184	0.199	0.066	117.322	1.722	0.574	84.117	1.681	0.56	-1.163	0.015	0.005
R437	2017-07-14 14:37 PDT	CO2 clumped	OK	FALSE	Evap Di + CM H GJ 6.15.17		Chewbacca	Heated Gas	CO2	2017-03-03 00:00:00 PST		9	9	1.72	0	0	-6.97	0.01	0	23.67	0.01	0	4.934	0.002	0.001	4.287	0.008	0.003	8.552	0.033	0.011	-0.767	0.039	0.013	7.092	0.215	0.072	-1.487	0.218	0.073	117.907	1.482	0.494	102.752	1.477	0.492	-1.187	0.015	0.005
R438	2017-07-14 16:43 PDT	CO2 clumped	OK	FALSE	ETH-1		Chewbacca	ETH-1-1	Calcite	2017-03-03 00:00:00 PST	90	9	9	2.1	0	0	5.65	0.01	0	36.68	0.01	0	5.725	0.004	0.001	17.036	0.007	0.002	22.215	0.026	0.009	-0.526	0.03	0.01	34.894	0.154	0.051	0.514	0.153	0.051	112.876	1.904	0.635	70.011	1.83	0.61	-1.134	0.017	0.006
R439	2017-07-15 01:19 PDT	CO2 clumped	OK	FALSE	ETH-2		Chewbacca	ETH-2-1	Calcite	2017-03-03 00:00:00 PST	90	9	9	-10.07	0	0	-10.87	0	0	19.65	0	0	-6.268	0.002	0.001	0.324	0.004	0.001	-6.831	0.048	0.016	-0.687	0.047	0.016	-1.065	0.116	0.039	-1.712	0.112	0.037	120.561	1.885	0.628	127.377	1.898	0.633	-1.203	0.017	0.006
R440	2017-07-15 12:12 PDT	CO2 clumped	OK	FALSE	Bonedry DI 4.7.17 NH		Chewbacca	Heated Gas	CO2	2017-03-03 00:00:00 PST		9	9	-37.62	0	0	-6.73	0	0	23.93	0	0	-31.963	0.004	0.001	4.452	0.005	0.002	-29.627	0.041	0.014	-0.912	0.043	0.014	7.672	0.163	0.054	-1.241	0.155	0.052	127.38	4.395	1.465	156.99	4.51	1.503	-1.244	0.026	0.009
R441	2017-07-15 14:21 PDT	CO2 clumped	OK	FALSE	Veinstrom		Chewbacca	Veinstrom	Calcite	2017-03-03 00:00:00 PST	90	9	9	-6.1	0	0	-4.82	0	0	25.9	0	0	-2.334	0.004	0.001	6.449	0.005	0.002	3.688	0.023	0.008	-0.229	0.022	0.007	12.196	0.117	0.039	-0.734	0.118	0.039	117.541	2.519	0.84	106.263	2.5	0.833	-1.178	0.016	0.005
R442	2017-07-15 23:03 PDT	CO2 clumped	OK	FALSE	Carrara Marble-UCLA		Chewbacca	Carrara Marble	Calcite	2017-03-03 00:00:00 PST	90	9	9	2.09	0	0	6.38	0	0	37.43	0	0	5.737	0.002	0.001	17.773	0.004	0.001	23.023	0.039	0.013	-0.46	0.037	0.012	36.68	0.216	0.072	0.79	0.209	0.07	113.409	2.341	0.78	68.986	2.246	0.749	-1.131	0.021	0.007
R443	2017-07-16 14:48 PDT	CO2 clumped	OK	FALSE	Bonedry DI UH 6.7.17 DU		Chewbacca	Unheated gas	CO2	2017-03-03 00:00:00 PST		9	9	-37.44	0	0	2.14	0	0	33.07	0	0	-31.479	0.004	0.001	13.413	0.002	0.001	-19.816	0.044	0.015	-0.095	0.045	0.015	27.387	0.222	0.074	0.37	0.217	0.072	116.924	1.866	0.622	125.839	1.885	0.628	-1.198	0.021	0.007
R444	2017-07-16 16:54 PDT	CO2 clumped	OK	FALSE	ETH-3		Chewbacca	ETH-3-1	Calcite	2017-03-03 00:00:00 PST	90	9	9	1.71	0	0	5.95	0	0	37	0	0	5.367	0.002	0.001	17.344	0.004	0.001	22.495	0.042	0.014	-0.182	0.04	0.013	35.923	0.214	0.071	0.903	0.21	0.07	110.485	1.7	0.567	67.481	1.633	0.544	-1.118	0.016	0.005
R445	2017-07-17 13:12 PDT	CO2 clumped	OK	FALSE	Evap DI+CM UH 6.28.17 DU		Chewbacca	Unheated gas	CO2	2017-03-03 00:00:00 PST		9	9	1.2	0	0	-2.17	0.01	0	28.62	0.01	0	4.609	0.003	0.001	9.135	0.006	0.002	13.894	0.047	0.016	0.114	0.048	0.016	18.04	0.212	0.071	-0.307	0.201	0.067	116.776	2.408	0.803	91.635	2.343	0.781	-1.185	0.021	0.007
R446	2017-07-17 15:19 PDT	CO2 clumped	OK	FALSE	ETH-4		Chewbacca	ETH-4-1	Calcite	2017-03-03 00:00:00 PST	90	9	9	-10.12	0	0	-11.05	0	0	19.47	0	0	-6.314	0.003	0.001	0.139	0.003	0.001	-6.828	0.027	0.009	-0.454	0.029	0.01	-1.555	0.149	0.05	-1.833	0.149	0.05	121.804	1.048	0.349	129.092	1.056	0.352	-1.225	0.01	0.003
R447	2017-07-18 12:38 PDT	CO2 clumped	OK	FALSE	Evap DI+CM H 5.8.17 GJ		Chewbacca	Heated Gas	CO2	2017-03-03 00:00:00 PST		9	9	2.17	0	0	3.46	0	0	34.43	0	0	5.713	0.002	0.001	14.827	0.004	0.001	19.85	0.035	0.012	-0.692	0.034	0.011	30.075	0.164	0.055	0.195	0.159	0.053	118.492	1.23	0.41	80.028	1.186	0.395	-1.201	0.011	0.004
R448	2017-07-18 14:44 PDT	CO2 clumped	OK	FALSE	Carmel Chalk		Chewbacca	Carmel Chalk	Calcite	2017-03-03 00:00:00 PST	90	9	9	-2.08	0	0	3.86	0	0	34.84	0	0	1.741	0.002	0.001	15.221	0.004	0.001	16.578	0.04	0.013	-0.205	0.041	0.014	31.202	0.188	0.063	0.513	0.186	0.062	118.674	1.563	0.521	83.942	1.517	0.506	-1.192	0.014	0.005
R449	2017-07-18 23:03 PDT	CO2 clumped	OK	FALSE	Carrara Marble-UCLA		Chewbacca	Carrara Marble	Calcite	2017-03-03 00:00:00 PST	90	9	9	2.1	0	0	6.39	0	0	37.44	0.01	0	5.752	0.002	0.001	17.785	0.005	0.002	23.06	0.05	0.017	-0.451	0.05	0.017	36.874	0.123	0.041	0.954	0.118	0.039	116.418	1.787	0.596	71.834	1.713	0.571	-1.16	0.017	0.006
R450	2017-07-19 16:00 PDT	CO2 clumped	OK	FALSE	ETH 1		Chewbacca	ETH-1-1	Calcite	2017-03-03 00:00:00 PST	90	9	9	2	0	0	5.46	0	0	36.49	0	0	5.628	0.002	0.001	16.85	0.003	0.001	21.916	0.032	0.011	-0.539	0.029	0.01	34.7	0.166	0.055	0.693	0.156	0.052	115.231	2.193	0.731	72.77	2.107	0.702	-1.155	0.019	0.006
R451	2017-07-20 00:14 PDT	CO2 clumped	OK	FALSE	ETH 2		Chewbacca	ETH-2-1	Calcite	2017-03-03 00:00:00 PST	90	9	9	-10.14	0	0	-10.96	0	0	19.56	0	0	-6.334	0.004	0.001	0.227	0.004	0.001	-6.981	0.04	0.013	-0.673	0.042	0.014	-1.246	0.194	0.065	-1.7	0.195	0.065	120.691	1.841	0.614	127.802	1.856	0.619	-1.213	0.018	0.006
R452	2017-07-20 11:08 PDT	CO2 clumped	OK	FALSE	Bonedry DI UH 7.19.17		Chewbacca	Unheated gas	CO2	2017-03-03 00:00:00 PST		9	8	-37.71	0	0	-4.05	0.01	0	26.69	0.01	0	-31.949	0.003	0.001	7.155	0.006	0.002	-26.319	0.025	0.009	-0.164	0.025	0.009	13.734	0.14	0.05	-0.619	0.135	0.048	125.87	4.056	1.434	149.34	4.145	1.465	-1.238	0.024	0.009
R453	2017-07-20 13:16 PDT	CO2 clumped	OK	FALSE	VeinStrom		Chewbacca	Veinstrom	Calcite	2017-03-03 00:00:00 PST	90	9	9	-6.1	0	0	-4.83	0	0	25.88	0	0	-2.331	0.003	0.001	6.431	0.004	0.001	3.661	0.033	0.011	-0.241	0.034	0.011	12.072	0.226	0.075	-0.822	0.22	0.073	117.466	2.506	0.835	106.224	2.486	0.829	-1.177	0.02	0.007
R454	2017-07-20 21:40 PDT	CO2 clumped	OK	FALSE	ETH 4		Chewbacca	ETH-4-1	Calcite	2017-03-03 00:00:00 PST	90	9	9	-10.11	0	0	-10.93	0	0	19.59	0	0	-6.304	0.003	0.001	0.262	0.003	0.001	-6.721	0.026	0.009	-0.477	0.027	0.009	-1.222	0.197	0.066	-1.745	0.196	0.065	119.343	2.011	0.67	126.332	2.018	0.673	-1.196	0.018	0.006
R455	2017-07-21 13:49 PDT	CO2 clumped	OK	FALSE	ETH-3		Chewbacca	ETH-3-1	Calcite	2017-03-03 00:00:00 PST	90	9	9	1.68	0	0	5.87	0.01	0	36.92	0.01	0	5.338	0.002	0.001	17.266	0.006	0.002	22.405	0.037	0.012	-0.165	0.037	0.012	35.699	0.175	0.058	0.84	0.174	0.058	112.403	2.003	0.668	69.52	1.923	0.641	-1.143	0.018	0.006
R456	2017-07-21 20:05 PDT	CO2 clumped	OK	FALSE	SRM 88B Dolomitic Limestone		Chewbacca	SRM 88B	Dolomite	2017-03-03 00:00:00 PST	90	9	9	1.97	0	0	1.23	0.01	0	32.13	0.01	0	5.446	0.002	0.001	12.579	0.005	0.002	17.753	0.037	0.012	-0.296	0.036	0.012	25.419	0.146	0.049	0.101	0.145	0.048	112.172	1.65	0.55	78.922	1.607	0.536	-1.142	0.013	0.004
R457	2017-07-22 12:07 PDT	CO2 clumped	OK	FALSE	Evap DI + CM H 7.10.17 DU		Chewbacca	Heated Gas	CO2	2017-03-03 00:00:00 PST		9	8	1.91	0	0	-2.15	0	0	28.65	0	0	5.276	0.003	0.001	9.161	0.005	0.002	13.759	0.05	0.018	-0.729	0.054	0.019	17.722	0.147	0.052	-0.671	0.15	0.053	117.675	3.47	1.227	91.685	3.387	1.197	-1.187	0.026	0.009
R458	2017-07-22 14:16 PDT	CO2 clumped	OK	FALSE	Carrara Marble		Chewbacca	Carrara Marble	Calcite	2017-03-03 00:00:00 PST	90	9	9	2.05	0	0	6.3	0	0	37.35	0	0	5.7	0.003	0.001	17.694	0.004	0.001	22.942	0.033	0.011	-0.424	0.033	0.011	36.59	0.248	0.083	0.859	0.243	0.081	111.345	2.071	0.69	67.21	1.984	0.661	-1.131	0.016	0.005
R459	2017-07-22 22:29 PDT	CO2 clumped	OK	FALSE	Carmel Chalk		Chewbacca	Carmel Chalk	Calcite	2017-03-03 00:00:00 PST	90	9	9	-2.15	0	0	3.87	0.01	0	34.85	0.01	0	1.673	0.002	0.001	15.236	0.005	0.002	16.509	0.042	0.014	-0.218	0.043	0.014	31.315	0.277	0.092	0.593	0.269	0.09	112.418	1.428	0.476	77.927	1.386	0.462	-1.138	0.013	0.004
R460	2017-07-23 11:22 PDT	CO2 clumped	OK	FALSE	Bonedry DI H NH 4-7-17		Chewbacca	Unheated gas	CO2	2017-03-03 00:00:00 PST		9	9	-37.38	0	0	-3.77	0	0	26.98	0	0	-31.628	0.003	0.001	7.443	0.003	0.001	-25.623	0.041	0.014	-0.073	0.042	0.014	14.527	0.122	0.041	-0.408	0.125	0.042	117.535	1.861	0.62	139.788	1.895	0.632	-1.21	0.022	0.007
R461	2017-07-23 13:30 PDT	CO2 clumped	OK	FALSE	SRM 88B		Chewbacca	SRM 88B	Dolomite	2017-03-03 00:00:00 PST	90	9	9	1.92	0	0	1.09	0.01	0	31.99	0.01	0	5.396	0.002	0.001	12.435	0.007	0.002	17.586	0.041	0.014	-0.268	0.036	0.012	25.199	0.214	0.071	0.171	0.206	0.069	111.705	1.912	0.637	78.828	1.856	0.619	-1.141	0.02	0.007
R462	2017-07-23 21:56 PDT	CO2 clumped	OK	FALSE	Veinstrom		Chewbacca	Veinstrom	Calcite	2017-03-03 00:00:00 PST	90	9	9	-6.1	0	0	-4.79	0.01	0	25.92	0.01	0	-2.325	0.003	0.001	6.474	0.008	0.003	3.73	0.034	0.011	-0.221	0.037	0.012	12.313	0.18	0.06	-0.669	0.184	0.061	116.421	1.54	0.513	105.088	1.52	0.507	-1.172	0.013	0.004
R463	2017-07-24 12:28 PDT	CO2 clumped	OK	FALSE	Bonedry DI UH GJ 7.19.17		Chewbacca	Unheated gas	CO2	2017-03-03 00:00:00 PST		9	9	-37.82	0	0	-4.24	0	0	26.49	0	0	-32.065	0.002	0.001	6.963	0.004	0.001	-26.587	0.028	0.009	-0.128	0.03	0.01	13.319	0.182	0.061	-0.647	0.181	0.06	117.844	0.757	0.252	141.722	0.772	0.257	-1.217	0.007	0.002
R464	2017-07-24 14:34 PDT	CO2 clumped	OK	FALSE	ETH-1		Chewbacca	ETH-1-1	Calcite	2017-03-03 00:00:00 PST	90	9	9	2.02	0	0	5.52	0.01	0	36.56	0.01	0	5.648	0.003	0.001	16.913	0.006	0.002	21.997	0.044	0.015	-0.541	0.045	0.015	34.699	0.216	0.072	0.566	0.208	0.069	108.938	2.162	0.721	66.564	2.081	0.694	-1.119	0.021	0.007
R465	2017-07-24 20:57 PDT	CO2 clumped	OK	FALSE	ETH-2		Chewbacca	ETH-2-1	Calcite	2017-03-03 00:00:00 PST	90	9	9	-10.11	0	0	-10.96	0	0	19.56	0.01	0	-6.306	0.003	0.001	0.233	0.005	0.002	-6.947	0.04	0.013	-0.675	0.043	0.014	-1.217	0.17	0.057	-1.683	0.165	0.055	116.183	1.634	0.545	123.217	1.651	0.55	-1.188	0.016	0.005
R466	2017-07-25 12:43 PDT	CO2 clumped	OK	FALSE	Evap DI + CM UH DU 6.28.17		Chewbacca	Unheated gas	CO2	2017-03-03 00:00:00 PST		9	9	2.24	0	0	-0.19	0	0	30.66	0.01	0	5.655	0.002	0.001	11.139	0.005	0.002	16.928	0.035	0.012	0.077	0.036	0.012	22.361	0.152	0.051	-0.041	0.151	0.05	115.675	3.017	1.006	85.11	2.937	0.979	-1.18	0.022	0.007
R467	2017-07-25 14:45 PDT	CO2 clumped	OK	FALSE	ETH-3		Chewbacca	ETH-3-1	Calcite	2017-03-03 00:00:00 PST	90	9	9	1.68	0	0	5.96	0	0	37	0	0	5.338	0.003	0.001	17.348	0.005	0.002	22.487	0.037	0.012	-0.164	0.033	0.011	35.882	0.18	0.06	0.855	0.175	0.058	112.181	1.234	0.411	69.136	1.186	0.395	-1.151	0.012	0.004
R468	2017-07-25 21:11 PDT	CO2 clumped	OK	FALSE	ETH-4		Chewbacca	ETH-4-1	Calcite	2017-03-03 00:00:00 PST	90	9	9	-10.11	0	0	-10.95	0.01	0	19.57	0.01	0	-6.307	0.002	0.001	0.244	0.006	0.002	-6.708	0.022	0.007	-0.444	0.024	0.008	-1.35	0.232	0.077	-1.837	0.237	0.079	117.734	0.85	0.283	124.755	0.855	0.285	-1.202	0.009	0.003
R469	2017-07-26 15:19 PDT	CO2 clumped	OK	FALSE	Carrara Marble-UCLA		Chewbacca	Carrara Marble	Calcite	2017-03-03 00:00:00 PST	90	9	9	2.01	0	0	6.23	0.01	0	37.28	0.01	0	5.658	0.003	0.001	17.621	0.007	0.002	22.807	0.027	0.009	-0.444	0.022	0.007	36.446	0.189	0.063	0.863	0.188	0.063	108.176	1.317	0.439	64.363	1.276	0.425	-1.105	0.015	0.005
R470	2017-07-26 21:55 PDT	CO2 clumped	OK	FALSE	Carmel Chalk		Chewbacca	Carmel Chalk	Calcite	2017-03-03 00:00:00 PST	90	9	9	-2.18	0	0	3.85	0.01	0	34.83	0.01	0	1.649	0.003	0.001	15.217	0.007	0.002	16.473	0.045	0.015	-0.21	0.041	0.014	31.208	0.148	0.049	0.526	0.156	0.052	109.586	2.57	0.857	75.25	2.492	0.831	-1.119	0.026	0.009
R471	2017-07-27 11:36 PDT	CO2 clumped	OK	FALSE	Bonedry DI H 6.6.17 DU		Chewbacca	Heated Gas	CO2	2017-03-03 00:00:00 PST		9	9	-37.52	0	0	-0.03	0	0	30.83	0	0	-31.632	0.005	0.002	11.217	0.004	0.001	-22.872	0.036	0.012	-0.924	0.037	0.012	22.323	0.16	0.053	-0.233	0.155	0.052	121.392	4.08	1.36	135.359	4.134	1.378	-1.22	0.021	0.007
R472	2017-07-27 13:44 PDT	CO2 clumped	OK	FALSE	88B Dolomitic limestone		Chewbacca	SRM 88B	Dolomite	2017-03-03 00:00:00 PST	90	9	9	1.97	0	0	1.18	0.01	0	32.08	0.01	0	5.447	0.003	0.001	12.527	0.005	0.002	17.727	0.039	0.013	-0.272	0.04	0.013	25.405	0.202	0.067	0.191	0.193	0.064	112.826	2.98	0.993	79.665	2.893	0.964	-1.148	0.028	0.009
R473	2017-07-27 22:17 PDT	CO2 clumped	OK	FALSE	VeinStrom		Chewbacca	Veinstrom	Calcite	2017-03-03 00:00:00 PST	90	9	9	-6.11	0	0	-4.74	0	0	25.97	0.01	0	-2.337	0.002	0.001	6.52	0.005	0.002	3.761	0.052	0.017	-0.222	0.054	0.018	12.362	0.15	0.05	-0.712	0.152	0.051	113.634	2.411	0.804	102.246	2.384	0.795	-1.155	0.024	0.008
R474	2017-07-28 12:41 PDT	CO2 clumped	OK	FALSE	Bonedry DI UH 6.19.17 DU		Chewbacca	Unheated gas	CO2	2017-03-03 00:00:00 PST		9	9	-37.6	0	0	1.89	0	0	32.81	0	0	-31.646	0.004	0.001	13.159	0.004	0.001	-20.241	0.043	0.014	-0.104	0.042	0.014	26.94	0.185	0.062	0.437	0.182	0.061	117.983	2.127	0.709	127.669	2.143	0.714	-1.221	0.023	0.008
R475	2017-07-28 14:47 PDT	CO2 clumped	OK	FALSE	8544 NBS19 Limestone		Chewbacca	NBS 19	Calcite	2017-03-03 00:00:00 PST	90	9	9	1.94	0	0	5.64	0	0	36.67	0	0	5.578	0.002	0.001	17.028	0.002	0.001	22.121	0.026	0.009	-0.459	0.026	0.009	34.994	0.223	0.074	0.627	0.216	0.072	109.21	2.63	0.877	66.669	2.529	0.843	-1.124	0.023	0.008
R476	2017-07-29 13:51 PDT	CO2 clumped	OK	FALSE	ETH-2		Chewbacca	ETH-2-1	Calcite	2017-03-03 00:00:00 PST	90	9	9	-10.11	0	0	-10.95	0	0	19.57	0	0	-6.307	0.003	0.001	0.239	0.003	0.001	-6.952	0.05	0.017	-0.684	0.051	0.017	-1.529	0.144	0.048	-2.006	0.145	0.048	121.682	2.116	0.705	128.74	2.134	0.711	-1.25	0.02	0.007
R477	2017-07-29 20:05 PDT	CO2 clumped	OK	FALSE	ETH-4		Chewbacca	ETH-4-1	Calcite	2017-03-03 00:00:00 PST	90	9	9	-10.12	0	0	-11	0	0	19.52	0	0	-6.312	0.002	0.001	0.189	0.004	0.001	-6.784	0.035	0.012	-0.461	0.037	0.012	-1.486	0.246	0.082	-1.863	0.249	0.083	120.234	1.935	0.645	127.4	1.95	0.65	-1.219	0.017	0.006
R478	2017-07-30 12:48 PDT	CO2 clumped	OK	FALSE	Evap DI+CM H 7.10.17 DU		Chewbacca	Heated Gas	CO2	2017-03-03 00:00:00 PST		9	9	1.35	0	0	-3.49	0	0	27.26	0.01	0	4.701	0.002	0.001	7.801	0.005	0.002	11.826	0.043	0.014	-0.722	0.042	0.014	14.904	0.155	0.052	-0.747	0.147	0.049	109.886	2.115	0.705	87.617	2.076	0.692	-1.145	0.021	0.007
R479	2017-07-30 14:58 PDT	CO2 clumped	OK	FALSE	Carrara Marble-UCLA		Chewbacca	Carrara Marble	Calcite	2017-03-03 00:00:00 PST	90	9	9	2.02	0	0	6.2	0	0	37.25	0	0	5.669	0.003	0.001	17.594	0.005	0.002	22.822	0.037	0.012	-0.413	0.036	0.012	36.423	0.201	0.067	0.894	0.193	0.064	107.401	1.604	0.535	63.663	1.545	0.515	-1.11	0.017	0.006
R480	2017-07-30 21:23 PDT	CO2 clumped	OK	FALSE	Carmel Chalk		Chewbacca	Carmel Chalk	Calcite	2017-03-03 00:00:00 PST	90	9	9	-2.17	0	0	3.88	0	0	34.86	0	0	1.662	0.004	0.001	15.241	0.003	0.001	16.476	0.033	0.011	-0.243	0.033	0.011	31.252	0.264	0.088	0.521	0.258	0.086	111.831	1.859	0.62	77.359	1.802	0.601	-1.14	0.018	0.006
R481	2017-07-31 12:12 PDT	CO2 clumped	OK	FALSE	Bonedry DI UH 7.19.17 DU		Chewbacca	Unheated gas	CO2	2017-03-03 00:00:00 PST		9	9	-37.18	0	0	-3.3	0	0	27.46	0	0	-31.426	0.004	0.001	7.912	0.004	0.001	-25.024	0.062	0.021	-0.132	0.062	0.021	15.278	0.225	0.075	-0.6	0.223	0.074	121.614	2.134	0.711	142.648	2.18	0.727	-1.257	0.024	0.008
R482	2017-07-31 14:15 PDT	CO2 clumped	OK	FALSE	VeinStrom		Chewbacca	Veinstrom	Calcite	2017-03-03 00:00:00 PST	90	9	9	-6.16	0	0	-4.92	0	0	25.78	0	0	-2.387	0.003	0.001	6.34	0.004	0.001	3.487	0.055	0.018	-0.267	0.055	0.018	11.863	0.225	0.075	-0.846	0.225	0.075	117.187	1.88	0.627	106.212	1.867	0.622	-1.21	0.017	0.006
R483	2017-07-31 20:42 PDT	CO2 clumped	OK	FALSE	88B Dolomitic Limestone		Chewbacca	SRM 88B	Dolomite	2017-03-03 00:00:00 PST	90	9	9	2	0	0	1.25	0	0	32.15	0.01	0	5.48	0.002	0.001	12.597	0.005	0.002	17.84	0.045	0.015	-0.263	0.047	0.016	25.473	0.233	0.078	0.118	0.232	0.077	115.69	2.369	0.79	82.259	2.297	0.766	-1.178	0.02	0.007
R484	2017-08-01 12:52 PDT	CO2 clumped	OK	FALSE	Bonedry DI H 6.6.17 DU		Chewbacca	Heated Gas	CO2	2017-03-03 00:00:00 PST		9	9	-37.35	0	0	1.04	0	0	31.93	0	0	-31.441	0.004	0.001	12.297	0.004	0.001	-21.619	0.035	0.012	-0.895	0.034	0.011	24.531	0.189	0.063	-0.21	0.187	0.062	121.63	2.46	0.82	132.983	2.479	0.826	-1.259	0.024	0.008
R485	2017-08-01 14:55 PDT	CO2 clumped	OK	FALSE	ETH-1		Chewbacca	ETH-1-1	Calcite	2017-03-03 00:00:00 PST	90	9	9	2.01	0	0	5.56	0.01	0	36.59	0.01	0	5.635	0.002	0.001	16.945	0.006	0.002	22.036	0.048	0.016	-0.522	0.045	0.015	34.853	0.072	0.024	0.653	0.062	0.021	114.018	1.997	0.666	71.398	1.919	0.64	-1.169	0.021	0.007
R486	2017-08-01 21:15 PDT	CO2 clumped	OK	FALSE	ETH-2		Chewbacca	ETH-2-1	Calcite	2017-03-03 00:00:00 PST	90	9	9	-10.1	0	0	-10.88	0.01	0	19.65	0.01	0	-6.294	0.003	0.001	0.315	0.005	0.002	-6.884	0.041	0.014	-0.705	0.045	0.015	-1.154	0.16	0.053	-1.784	0.161	0.054	120.084	1.955	0.652	126.946	1.959	0.653	-1.232	0.015	0.005
R487	2017-08-02 11:34 PDT	CO2 clumped	OK	FALSE	Evap DI+CM UH 7.27.17 NP		Chewbacca	Unheated gas	CO2	2017-03-03 00:00:00 PST		9	9	1.86	0	0	-0.86	0	0	29.98	0	0	5.276	0.003	0.001	10.467	0.004	0.001	15.817	0.032	0.011	0.027	0.031	0.01	20.909	0.17	0.057	-0.132	0.173	0.058	112.319	2.39	0.797	83.696	2.33	0.777	-1.168	0.023	0.008
R488	2017-08-02 13:38 PDT	CO2 clumped	OK	FALSE	ETH-4		Chewbacca	ETH-4-1	Calcite	2017-03-03 00:00:00 PST	90	9	9	-10.14	0	0	-11.04	0.01	0	19.48	0.01	0	-6.338	0.003	0.001	0.149	0.007	0.002	-6.866	0.042	0.014	-0.477	0.044	0.015	-1.451	0.091	0.03	-1.748	0.095	0.032	118.664	1.807	0.602	125.94	1.83	0.61	-1.22	0.018	0.006
R489	2017-08-02 20:02 PDT	CO2 clumped	OK	FALSE	Carrara Marble-UCLA		Chewbacca	Carrara Marble	Calcite	2017-03-03 00:00:00 PST	90	9	9	2.09	0	0	6.37	0	0	37.43	0.01	0	5.743	0.002	0.001	17.766	0.005	0.002	23.029	0.05	0.017	-0.454	0.052	0.017	36.836	0.189	0.063	0.954	0.183	0.061	108.71	1.814	0.605	64.481	1.74	0.58	-1.124	0.016	0.005
R490	2017-08-03 12:04 PDT	CO2 clumped	OK	FALSE	Evap DI+CM H 6.28.17 DU		Chewbacca	Heated Gas	CO2	2017-03-03 00:00:00 PST		9	9	2.4	0	0	-0.84	0.01	0	29.99	0.01	0	5.78	0.002	0.001	10.483	0.007	0.002	15.587	0.057	0.019	-0.731	0.059	0.02	20.538	0.212	0.071	-0.527	0.205	0.068	117.354	3.443	1.148	87.987	3.361	1.12	-1.182	0.023	0.008
R491	2017-08-03 14:07 PDT	CO2 clumped	OK	FALSE	Carmel Chalk		Chewbacca	Carmel Chalk	Calcite	2017-03-03 00:00:00 PST	90	9	9	-2.09	0	0	3.91	0.01	0	34.89	0.01	0	1.733	0.001	0	15.271	0.006	0.002	16.623	0.039	0.013	-0.201	0.041	0.014	31.355	0.212	0.071	0.563	0.204	0.068	112.897	1.663	0.554	78.249	1.619	0.54	-1.155	0.015	0.005
R492	2017-08-03 20:18 PDT	CO2 clumped	OK	FALSE	VeinStrom		Chewbacca	Veinstrom	Calcite	2017-03-03 00:00:00 PST	90	9	9	-6.07	0	0	-4.76	0	0	25.95	0	0	-2.3	0.002	0.001	6.502	0.004	0.001	3.747	0.05	0.017	-0.256	0.05	0.017	12.223	0.284	0.095	-0.813	0.278	0.093	117.484	2.314	0.771	106.053	2.286	0.762	-1.199	0.02	0.007
R493	2017-08-04 11:49 PDT	CO2 clumped	OK	FALSE	Bonedry DI UH 8.3.17 DU		Chewbacca	Unheated gas	CO2	2017-03-03 00:00:00 PST		9	9	-38.07	0	0	-4.84	0.01	0	25.88	0.01	0	-32.32	0.003	0.001	6.361	0.006	0.002	-27.437	0.03	0.01	-0.142	0.031	0.01	12.113	0.131	0.044	-0.641	0.124	0.041	119.762	2.721	0.907	145.347	2.786	0.929	-1.232	0.025	0.008
R494	2017-08-04 13:56 PDT	CO2 clumped	OK	FALSE	SRM 88B Dolomitic Limestone		Chewbacca	SRM 88B	Dolomite	2017-03-03 00:00:00 PST	90	9	9	1.96	0	0	1.19	0	0	32.08	0	0	5.441	0.002	0.001	12.531	0.004	0.001	17.732	0.019	0.006	-0.265	0.018	0.006	25.448	0.288	0.096	0.224	0.282	0.094	114.335	2.238	0.746	81.127	2.173	0.724	-1.167	0.02	0.007
R495	2017-08-04 20:15 PDT	CO2 clumped	OK	FALSE	ETH-1		Chewbacca	ETH-1-1	Calcite	2017-03-03 00:00:00 PST	90	9	9	2.07	0	0	5.65	0	0	36.69	0	0	5.696	0.002	0.001	17.045	0.003	0.001	22.167	0.032	0.011	-0.551	0.032	0.011	35.114	0.313	0.104	0.71	0.301	0.1	108.727	2.523	0.841	66.036	2.431	0.81	-1.121	0.023	0.008
R496	2017-08-07 12:42 PDT	CO2 clumped	OK	FALSE	Bonedry DI H 7.19.17 DU		Chewbacca	Heated Gas	CO2	2017-03-03 00:00:00 PST		9	9	-37.95	0	0	-5.72	0.01	0	24.96	0.01	0	-32.237	0.002	0.001	5.467	0.007	0.002	-28.978	0.037	0.012	-0.943	0.043	0.014	9.775	0.213	0.071	-1.176	0.22	0.073	126.838	2.05	0.683	154.491	2.099	0.7	-1.317	0.018	0.006
R497	2017-08-07 14:50 PDT	CO2 clumped	OK	FALSE	ETH-2		Chewbacca	ETH-2-1	Calcite	2017-03-03 00:00:00 PST	90	9	9	-10.2	0	0	-11.08	0.01	0	19.44	0.01	0	-6.396	0.004	0.001	0.113	0.005	0.002	-7.163	0.054	0.018	-0.68	0.051	0.017	-1.855	0.229	0.076	-2.08	0.23	0.077	124.343	1.574	0.525	131.807	1.591	0.53	-1.293	0.014	0.005
R498	2017-08-08 12:21 PDT	CO2 clumped	OK	FALSE	Evap DI + CM UH 7.10.17 GJ		Chewbacca	Unheated gas	CO2	2017-03-03 00:00:00 PST		9	9	0.5	0	0	-3.36	0	0	27.39	0	0	3.914	0.003	0.001	7.929	0.005	0.002	11.975	0.045	0.015	0.109	0.044	0.015	15.549	0.168	0.056	-0.366	0.169	0.056	112.85	2.258	0.753	91.161	2.211	0.737	-1.189	0.022	0.007
R499	2017-08-09 13:30 PDT	CO2 clumped	OK	FALSE	Evap DI+CM H 7.10.17 GJ		Chewbacca	Heated Gas	CO2	2017-03-03 00:00:00 PST		9	9	0.88	0	0	-4.65	0.01	0	26.06	0.01	0	4.226	0.002	0.001	6.627	0.007	0.002	10.142	0.046	0.015	-0.754	0.049	0.016	12.213	0.214	0.071	-1.071	0.214	0.071	120.247	2.082	0.694	100.843	2.043	0.681	-1.247	0.019	0.006
R500	2017-08-09 15:43 PDT	CO2 clumped	OK	FALSE	SRM 88B		Chewbacca	SRM 88B	Dolomite	2017-03-03 00:00:00 PST	90	9	9	1.96	0	0	1.19	0.01	0	32.08	0.01	0	5.44	0.003	0.001	12.529	0.006	0.002	17.709	0.054	0.018	-0.285	0.057	0.019	25.333	0.173	0.058	0.115	0.171	0.057	118.454	2.66	0.887	85.128	2.584	0.861	-1.217	0.024	0.008
R501	2017-08-09 21:54 PDT	CO2 clumped	OK	FALSE	ETH-1		Chewbacca	ETH-1-1	Calcite	2017-03-03 00:00:00 PST	90	9	9	2.02	0	0	5.66	0.01	0	36.7	0.01	0	5.651	0.002	0.001	17.053	0.005	0.002	22.143	0.044	0.015	-0.537	0.046	0.015	35.039	0.214	0.071	0.62	0.211	0.07	117.864	2.293	0.764	74.854	2.21	0.737	-1.2	0.021	0.007
R502	2017-08-10 14:49 PDT	CO2 clumped	OK	FALSE	CMTile		Chewbacca	CMTile	Calcite	2017-03-03 00:00:00 PST	90	9	9	1.98	0	0	6.21	0	0	37.26	0	0	5.636	0.002	0.001	17.608	0.003	0.001	22.766	0.024	0.008	-0.449	0.022	0.007	36.5	0.145	0.048	0.94	0.143	0.048	109.632	1.824	0.608	65.813	1.75	0.583	-1.135	0.015	0.005
R503	2017-08-10 21:00 PDT	CO2 clumped	OK	FALSE	8544 NBS19 Limestone		Chewbacca	NBS 19	Calcite	2017-03-03 00:00:00 PST	90	9	9	1.98	0	0	5.75	0	0	36.79	0	0	5.62	0.002	0.001	17.143	0.004	0.001	22.276	0.06	0.02	-0.462	0.058	0.019	35.362	0.192	0.064	0.756	0.183	0.061	109.454	1.7	0.567	66.618	1.628	0.543	-1.134	0.015	0.005
R504	2017-08-11 12:35 PDT	CO2 clumped	OK	FALSE	Bonedry DI UH 7.19.17 DU		Chewbacca	Unheated gas	CO2	2017-03-03 00:00:00 PST		9	9	-37.94	0	0	-4.41	0.01	0	26.31	0.01	0	-32.18	0.003	0.001	6.792	0.006	0.002	-26.893	0.043	0.014	-0.153	0.048	0.016	12.955	0.161	0.054	-0.666	0.161	0.054	118.365	1.397	0.466	142.781	1.432	0.477	-1.257	0.015	0.005
R505	2017-08-11 14:41 PDT	CO2 clumped	OK	FALSE	Carmel Chalk		Chewbacca	Carmel Chalk	Calcite	2017-03-03 00:00:00 PST	90	9	9	-2.27	0	0	3.8	0.01	0	34.78	0.01	0	1.563	0.002	0.001	15.16	0.006	0.002	16.333	0.057	0.019	-0.203	0.054	0.018	31.132	0.208	0.069	0.565	0.197	0.066	111.033	0.861	0.287	76.87	0.835	0.278	-1.163	0.009	0.003
R506	2017-08-11 21:02 PDT	CO2 clumped	OK	FALSE	VeinStrom		Chewbacca	Veinstrom	Calcite	2017-03-03 00:00:00 PST	90	9	9	-6.09	0	0	-4.73	0.01	0	25.98	0.01	0	-2.316	0.001	0	6.536	0.006	0.002	3.792	0.036	0.012	-0.228	0.033	0.011	12.498	0.122	0.041	-0.609	0.123	0.041	114.501	1.891	0.63	103.046	1.881	0.627	-1.197	0.02	0.007
R507	2017-08-12 14:48 PDT	CO2 clumped	OK	FALSE	Evap DI + CM UH 7.10.17 DU		Chewbacca	Unheated gas	CO2	2017-03-03 00:00:00 PST		9	9	2.59	0	0	0.42	0	0	31.3	0	0	6.003	0.003	0.001	11.761	0.005	0.002	17.895	0.042	0.014	0.066	0.039	0.013	25.98	0.473	0.158	2.266	0.461	0.154	114.309	1.879	0.626	82.074	1.822	0.607	-1.195	0.019	0.006
R508	2017-08-12 16:51 PDT	CO2 clumped	OK	FALSE	ETH-1		Chewbacca	ETH-1-1	Calcite	2017-03-03 00:00:00 PST	90	9	9	2.02	0	0	5.53	0	0	36.56	0	0	5.648	0.003	0.001	16.919	0.002	0.001	22.015	0.027	0.009	-0.529	0.026	0.009	36.492	0.167	0.056	2.289	0.164	0.055	112.861	1.459	0.486	70.325	1.406	0.469	-1.173	0.012	0.004
R509	2017-08-12 23:20 PDT	CO2 clumped	OK	FALSE	ETH-2		Chewbacca	ETH-2-1	Calcite	2017-03-03 00:00:00 PST	90	9	9	-10.09	0	0	-10.91	0	0	19.62	0	0	-6.284	0.002	0.001	0.285	0.004	0.001	-6.881	0.045	0.015	-0.682	0.048	0.016	378.321	14.353	4.784	377.536	14.342	4.781	78.775	2.222	0.741	85.439	2.237	0.746	-0.783	0.024	0.008
R510	2017-08-14 12:20 PDT	CO2 clumped	OK	FALSE	Bonedry DI H 7.19.17 DU		Chewbacca	Heated Gas	CO2	2017-03-03 00:00:00 PST		9	9	-37.61	0	0	-4.91	0	0	25.8	0	0	-31.891	0.003	0.001	6.289	0.003	0.001	-27.868	0.051	0.017	-0.973	0.057	0.019	12.145	0.207	0.069	-0.467	0.204	0.068	128.335	1.681	0.56	153.73	1.722	0.574	-1.333	0.018	0.006
R511	2017-08-14 14:25 PDT	CO2 clumped	OK	FALSE	88B Dolomitic Limestone		Chewbacca	SRM 88B	Dolomite	2017-03-03 00:00:00 PST	90	9	9	1.9	0	0	1.1	0	0	31.99	0	0	5.382	0.004	0.001	12.443	0.004	0.001	17.574	0.04	0.013	-0.274	0.038	0.013	25.411	0.185	0.062	0.361	0.179	0.06	120.3	1.71	0.57	87.167	1.656	0.552	-1.241	0.018	0.006
R512	2017-08-14 16:33 PDT	CO2 clumped	OK	FALSE	ETH-4		Chewbacca	ETH-4-1	Calcite	2017-03-03 00:00:00 PST	90	9	9	-10.14	0	0	-11.03	0	0	19.49	0	0	-6.332	0.002	0.001	0.162	0.004	0.001	-6.826	0.048	0.016	-0.456	0.046	0.015	-1.02	0.215	0.072	-1.343	0.218	0.073	122.959	1.68	0.56	130.226	1.695	0.565	-1.28	0.014	0.005
R513	2017-08-14 18:38 PDT	CO2 clumped	OK	FALSE	CMTile		Chewbacca	CMTile	Calcite	2017-03-03 00:00:00 PST	90	9	9	2.08	0	0	6.38	0	0	37.44	0	0	5.731	0.003	0.001	17.778	0.004	0.001	23.056	0.034	0.011	-0.426	0.031	0.01	37.169	0.346	0.115	1.253	0.332	0.111	115.74	2.126	0.709	71.222	2.043	0.681	-1.209	0.018	0.006
R514	2017-08-14 20:44 PDT	CO2 clumped	OK	FALSE	VeinStrom		Chewbacca	Veinstrom	Calcite	2017-03-03 00:00:00 PST	90	9	9	-6.09	0	0	-4.78	0	0	25.93	0	0	-2.32	0.003	0.001	6.481	0.004	0.001	3.697	0.036	0.012	-0.266	0.036	0.012	12.892	0.259	0.086	-0.11	0.255	0.085	118.945	1.24	0.413	107.567	1.228	0.409	-1.239	0.01	0.003
R515	2017-08-15 12:43 PDT	CO2 clumped	OK	FALSE	Bonedry DI UH 8.3.17 DU		Chewbacca	Unheated gas	CO2	2017-03-03 00:00:00 PST		9	9	-38.08	0	0	-4.82	0	0	25.89	0	0	-32.321	0.003	0.001	6.376	0.004	0.001	-27.428	0.048	0.016	-0.146	0.05	0.017	12.136	0.177	0.059	-0.65	0.178	0.059	118.365	2.154	0.718	143.885	2.209	0.736	-1.256	0.026	0.009
R516	2017-08-15 14:49 PDT	CO2 clumped	OK	FALSE	Carmel Chalk		Chewbacca	Carmel Chalk	Calcite	2017-03-03 00:00:00 PST	90	9	9	-2.21	0	0	3.8	0.01	0	34.78	0.01	0	1.618	0.003	0.001	15.161	0.006	0.002	16.367	0.017	0.006	-0.228	0.018	0.006	31.082	0.138	0.046	0.515	0.132	0.044	109.972	1.144	0.381	75.776	1.111	0.37	-1.162	0.012	0.004
R517	2017-08-15 21:04 PDT	CO2 clumped	OK	FALSE	ETH-1		Chewbacca	ETH-1-1	Calcite	2017-03-03 00:00:00 PST	90	9	9	2.05	0	0	5.65	0.01	0	36.69	0.01	0	5.675	0.004	0.001	17.042	0.006	0.002	22.136	0.037	0.012	-0.558	0.036	0.012	35.184	0.222	0.074	0.783	0.215	0.072	109.283	2.155	0.718	66.6	2.074	0.691	-1.145	0.019	0.006
R518	2017-08-16 12:05 PDT	CO2 clumped	OK	FALSE	Evap DI + CM UH 8.8.17 ND		Chewbacca	Unheated gas	CO2	2017-03-03 00:00:00 PST		9	9	2.19	0	0	0.05	0	0	30.91	0	0	5.614	0.004	0.001	11.383	0.004	0.001	17.139	0.019	0.006	0.09	0.018	0.006	22.872	0.195	0.065	-0.022	0.187	0.062	112.457	3.583	1.194	81.516	3.481	1.16	-1.176	0.029	0.01
R519	2017-08-16 14:09 PDT	CO2 clumped	OK	FALSE	ETH-2		Chewbacca	ETH-2-1	Calcite	2017-03-03 00:00:00 PST	90	9	9	-10.17	0	0	-11.08	0	0	19.44	0	0	-6.365	0.002	0.001	0.11	0.005	0.002	-7.159	0.039	0.013	-0.705	0.04	0.013	-1.583	0.117	0.039	-1.803	0.112	0.037	117.23	1.527	0.509	124.615	1.539	0.513	-1.222	0.013	0.004
R520	2017-08-16 20:21 PDT	CO2 clumped	OK	FALSE	8544 NBS19 Limestone		Chewbacca	NBS 19	Calcite	2017-03-03 00:00:00 PST	90	9	9	1.96	0	0	5.71	0.01	0	36.74	0.01	0	5.597	0.003	0.001	17.099	0.005	0.002	22.211	0.043	0.014	-0.459	0.044	0.015	35.312	0.183	0.061	0.794	0.173	0.058	111.689	1.959	0.653	68.884	1.878	0.626	-1.165	0.018	0.006
R521	2017-08-17 11:59 PDT	CO2 clumped	OK	FALSE	Evap DI + CM H 3.23.17		Chewbacca	Heated Gas	CO2	2017-03-03 00:00:00 PST		9	9	1.54	0	0	4.1	0.01	0	35.08	0.01	0	5.145	0.002	0.001	15.468	0.005	0.002	19.872	0.026	0.009	-0.708	0.026	0.009	31.469	0.162	0.054	0.284	0.155	0.052	112.82	3.426	1.142	73.865	3.313	1.104	-1.159	0.02	0.007
R522	2017-08-17 20:21 PDT	CO2 clumped	OK	FALSE	Carmel Chalk		Chewbacca	Carmel Chalk	Calcite	2017-03-03 00:00:00 PST	90	9	9	-2.1	0	0	4.01	0.01	0	34.99	0.01	0	1.729	0.003	0.001	15.37	0.005	0.002	16.701	0.031	0.01	-0.216	0.029	0.01	31.668	0.211	0.07	0.67	0.199	0.066	111.096	2.72	0.907	76.301	2.636	0.879	-1.16	0.023	0.008
R523	2017-08-18 13:23 PDT	CO2 clumped	OK	FALSE	Bonedry DI H 4.4.17 NH		Chewbacca	Heated Gas	CO2	2017-03-03 00:00:00 PST		9	9	-37.48	0	0	-5.97	0	0	24.71	0	0	-31.803	0.002	0.001	5.219	0.002	0.001	-28.815	0.046	0.015	-0.994	0.048	0.016	9.308	0.103	0.034	-1.145	0.103	0.034	118.24	1.933	0.644	145.69	1.982	0.661	-1.248	0.024	0.008
R524	2017-08-18 15:29 PDT	CO2 clumped	OK	FALSE	CMTile		Chewbacca	CMTile	Calcite	2017-03-03 00:00:00 PST	90	9	9	2.07	0	0	6.4	0.01	0	37.46	0.01	0	5.718	0.002	0.001	17.802	0.014	0.005	23.022	0.028	0.009	-0.47	0.034	0.011	36.925	0.226	0.075	0.969	0.24	0.08	108.136	1.383	0.461	63.885	1.351	0.45	-1.145	0.011	0.004
R525	2017-08-22 19:01 PDT	CO2 clumped	OK	FALSE	H2-02		Chewbacca	MallinckrodtCal	Calcite	2017-03-03 00:00:00 PST	90	9	9	-40.09	0	0	-14.11	0.01	0	16.32	0.01	0	-34.538	0.003	0.001	-3.009	0.005	0.002	-39.096	0.044	0.015	-0.641	0.045	0.015	-8.236	0.18	0.06	-2.241	0.181	0.06	120.086	2.301	0.767	169.782	2.413	0.804	-1.268	0.019	0.006
R526	2017-08-24 12:27 PDT	CO2 clumped	OK	FALSE	Bonedry DI H 6.6.17 DU		Chewbacca	Heated Gas	CO2	2017-03-03 00:00:00 PST		8	8	-37.83	0	0	-0.06	0.01	0	30.8	0.01	0	-31.923	0.004	0.001	11.186	0.006	0.002	-23.192	0.04	0.014	-0.91	0.042	0.015	21.734	0.222	0.079	-0.746	0.213	0.075	136.123	6.115	2.162	150.713	6.188	2.188	-1.342	0.037	0.013
R527	2017-08-25 13:15 PDT	CO2 clumped	OK	FALSE	Bonedry DI UH 8.3.17 BT		Chewbacca	Unheated gas	CO2	2017-03-03 00:00:00 PST		9	9	-37.84	0	0	-4.51	0.01	0	26.21	0.01	0	-32.094	0.004	0.001	6.692	0.007	0.002	-26.913	0.041	0.014	-0.169	0.044	0.015	12.652	0.236	0.079	-0.767	0.226	0.075	122.476	1.72	0.573	147.094	1.767	0.589	-1.305	0.019	0.006
R528	2017-08-25 17:23 PDT	CO2 clumped	OK	FALSE	Carmel Chalk		Chewbacca	Carmel Chalk	Calcite	2017-03-03 00:00:00 PST	90	9	9	-2.18	0	0	3.94	0.01	0	34.92	0.01	0	1.652	0.002	0.001	15.303	0.007	0.002	16.557	0.034	0.011	-0.213	0.032	0.011	31.445	0.221	0.074	0.587	0.214	0.071	113.601	1.838	0.613	78.958	1.786	0.595	-1.198	0.016	0.005
R529	2017-08-25 21:32 PDT	CO2 clumped	OK	FALSE	CMTile		Chewbacca	CMTile	Calcite	2017-03-03 00:00:00 PST	90	9	9	2.07	0	0	6.42	0	0	37.48	0	0	5.719	0.003	0.001	17.821	0.003	0.001	23.083	0.04	0.013	-0.431	0.041	0.014	36.765	0.145	0.048	0.777	0.137	0.046	111.367	1.255	0.418	66.946	1.205	0.402	-1.171	0.012	0.004
R530	2017-08-25 23:37 PDT	CO2 clumped	OK	FALSE	VeinStrom		Chewbacca	Veinstrom	Calcite	2017-03-03 00:00:00 PST	90	9	9	-6.12	0	0	-4.65	0	0	26.06	0	0	-2.342	0.003	0.001	6.614	0.005	0.002	3.834	0.042	0.014	-0.236	0.041	0.014	12.501	0.194	0.065	-0.76	0.19	0.063	116.606	2.124	0.708	104.991	2.102	0.701	-1.228	0.02	0.007
R531	2017-08-26 01:42 PDT	CO2 clumped	OK	FALSE	Mallinckrodt CaCO3		Chewbacca	MallinckrodtCal	Calcite	2017-03-03 00:00:00 PST	90	9	9	-40.24	0	0	-14.18	0	0	16.24	0	0	-34.68	0.002	0.001	-3.088	0.004	0.001	-39.31	0.026	0.009	-0.634	0.026	0.009	-8.585	0.196	0.065	-2.434	0.198	0.066	124.31	3.22	1.073	174.561	3.371	1.124	-1.302	0.029	0.01
R532	2017-08-27 17:07 PDT	CO2 clumped	OK	FALSE	CMTile		Chewbacca	CMTile	Calcite	2017-03-03 00:00:00 PST	90	9	9	2.04	0	0	6.34	0	0	37.4	0	0	5.691	0.002	0.001	17.741	0.005	0.002	22.945	0.027	0.009	-0.459	0.029	0.01	36.701	0.159	0.053	0.872	0.149	0.05	113.172	2.273	0.758	68.876	2.183	0.728	-1.196	0.022	0.007
R533	2017-08-27 23:32 PDT	CO2 clumped	OK	FALSE	Carmel Chalk		Chewbacca	Carmel Chalk	Calcite	2017-03-03 00:00:00 PST	90	9	9	-2.13	0	0	3.95	0	0	34.93	0	0	1.695	0.003	0.001	15.31	0.005	0.002	16.608	0.046	0.015	-0.215	0.042	0.014	31.484	0.289	0.096	0.61	0.279	0.093	112.501	2.193	0.731	77.827	2.132	0.711	-1.188	0.019	0.006
R534	2017-08-28 13:03 PDT	CO2 clumped	OK	FALSE	Evap DI+CM UH GJ 8-8-17		Chewbacca	Unheated gas	CO2	2017-03-03 00:00:00 PST		9	9	3.05	0	0	1.91	0	0	32.83	0	0	6.487	0.003	0.001	13.268	0.003	0.001	19.894	0.067	0.022	0.068	0.066	0.022	27.869	0.29	0.097	1.127	0.28	0.093	110.376	3.51	1.17	74.554	3.394	1.131	-1.16	0.024	0.008
R535	2017-08-28 15:13 PDT	CO2 clumped	OK	FALSE	Veinstrom		Chewbacca	Veinstrom	Calcite	2017-03-03 00:00:00 PST	90	9	9	-6.07	0	0	-4.66	0.02	0.01	26.06	0.02	0.01	-2.293	0.003	0.001	6.606	0.017	0.006	3.863	0.026	0.009	-0.25	0.025	0.008	13.088	0.257	0.086	-0.166	0.264	0.088	110.044	2.533	0.844	98.457	2.533	0.844	-1.171	0.021	0.007
R536	2017-08-28 21:25 PDT	CO2 clumped	OK	FALSE	88b Dolomitic Limestone		Chewbacca	SRM 88B	Dolomite	2017-03-03 00:00:00 PST	90	9	9	2.02	0	0	1.32	0	0	32.22	0	0	5.504	0.003	0.001	12.665	0.005	0.002	17.91	0.03	0.01	-0.286	0.032	0.011	25.798	0.145	0.048	0.299	0.143	0.048	105.509	1.324	0.441	72.211	1.285	0.428	-1.13	0.012	0.004
R537	2017-08-29 13:18 PDT	CO2 clumped	OK	FALSE	Bonedry DI H NH 7-6-17		Chewbacca	Heated Gas	CO2	2017-03-03 00:00:00 PST		9	9	-37.33	0	0	-4.76	0.01	0	25.96	0.01	0	-31.622	0.002	0.001	6.441	0.01	0.003	-27.403	0.049	0.016	-0.93	0.048	0.016	12.165	0.17	0.057	-0.75	0.165	0.055	112.103	1.175	0.392	136.458	1.208	0.403	-1.208	0.017	0.006
R538	2017-08-29 15:31 PDT	CO2 clumped	OK	FALSE	ETH-2-1		Chewbacca	ETH-2-1	Calcite	2017-03-03 00:00:00 PST	90	9	9	-10.11	0	0	-10.82	0.02	0.01	19.71	0.02	0.01	-6.3	0.002	0.001	0.378	0.019	0.006	-6.838	0.041	0.014	-0.714	0.043	0.014	-1.017	0.2	0.067	-1.773	0.183	0.061	114.27	1.887	0.629	120.966	1.891	0.63	-1.209	0.021	0.007
R539	2017-08-29 21:44 PDT	CO2 clumped	OK	FALSE	Mallinkrodt CaCO3		Chewbacca	MallinckrodtCal	Calcite	2017-03-03 00:00:00 PST	90	9	9	-40.33	0	0	-14.18	0.01	0	16.24	0.01	0	-34.76	0.003	0.001	-3.088	0.005	0.002	-39.383	0.049	0.016	-0.625	0.051	0.017	-8.455	0.234	0.078	-2.303	0.234	0.078	117.428	1.515	0.505	167.474	1.581	0.527	-1.247	0.015	0.005
R540	2017-08-30 12:49 PDT	CO2 clumped	OK	FALSE	Bonedry DI H NH 6-29-17		Chewbacca	Heated Gas	CO2	2017-03-03 00:00:00 PST		9	9	-37.42	0	0	1.11	0	0	32	0	0	-31.504	0.003	0.001	12.369	0.004	0.001	-21.657	0.036	0.012	-0.936	0.037	0.012	24.757	0.137	0.046	-0.132	0.136	0.045	113.026	1.439	0.48	124.214	1.452	0.484	-1.205	0.012	0.004
R541	2017-08-30 14:55 PDT	CO2 clumped	OK	FALSE	CMTile		Chewbacca	CMTile	Calcite	2017-03-03 00:00:00 PST	90	9	9	2.09	0	0	6.37	0	0	37.42	0	0	5.744	0.001	0	17.765	0.005	0.002	23.055	0.045	0.015	-0.429	0.043	0.014	36.834	0.18	0.06	0.954	0.171	0.057	105.38	2.612	0.871	61.286	2.506	0.835	-1.127	0.025	0.008
R542	2017-08-30 21:05 PDT	CO2 clumped	OK	FALSE	88b Dolomitic Limestone		Chewbacca	SRM 88B	Dolomite	2017-03-03 00:00:00 PST	90	9	9	2.01	0	0	1.33	0.01	0	32.23	0.01	0	5.494	0.003	0.001	12.677	0.005	0.002	17.931	0.032	0.011	-0.266	0.032	0.011	25.793	0.25	0.083	0.27	0.247	0.082	106.164	1.158	0.386	72.834	1.119	0.373	-1.123	0.012	0.004
R543	2017-08-31 13:31 PDT	CO2 clumped	OK	FALSE	Evap DI+CM H7/10/17		Chewbacca	Heated Gas	CO2	2017-03-03 00:00:00 PST		9	9	1.29	0	0	-3.46	0	0	27.29	0	0	4.648	0.003	0.001	7.835	0.004	0.001	11.77	0.042	0.014	-0.755	0.04	0.013	14.894	0.162	0.054	-0.824	0.162	0.054	110.766	1.315	0.438	88.47	1.29	0.43	-1.191	0.016	0.005
R544	2017-08-31 15:37 PDT	CO2 clumped	OK	FALSE	ETH-1		Chewbacca	ETH-1-1	Calcite	2017-03-03 00:00:00 PST	90	9	9	2.09	0	0	5.71	0	0	36.74	0	0	5.713	0.004	0.001	17.099	0.004	0.001	22.266	0.03	0.01	-0.525	0.034	0.011	35.222	0.221	0.074	0.706	0.212	0.071	109.554	1.969	0.656	66.699	1.894	0.631	-1.149	0.022	0.007
R545	2017-08-31 21:56 PDT	CO2 clumped	OK	FALSE	CMTile		Chewbacca	CMTile	Calcite	2017-03-03 00:00:00 PST	90	9	9	2.12	0	0	6.45	0.01	0	37.51	0.01	0	5.77	0.005	0.002	17.85	0.007	0.002	23.167	0.027	0.009	-0.428	0.023	0.008	36.939	0.221	0.074	0.887	0.219	0.073	110.263	2.215	0.738	65.769	2.13	0.71	-1.176	0.02	0.007
R546	2017-09-01 13:23 PDT	CO2 clumped	OK	FALSE	Bonedry DI UH 8/3/17		Chewbacca	Unheated gas	CO2	2017-03-03 00:00:00 PST		9	9	-37.99	0	0	-4.69	0.01	0	26.02	0.01	0	-32.239	0.002	0.001	6.507	0.006	0.002	-27.201	0.042	0.014	-0.129	0.046	0.015	12.283	0.167	0.056	-0.764	0.167	0.056	117.474	1.393	0.464	142.579	1.425	0.475	-1.26	0.016	0.005
R547	2017-09-01 15:33 PDT	CO2 clumped	OK	FALSE	ETH-2		Chewbacca	ETH-2-1	Calcite	2017-03-03 00:00:00 PST	90	9	9	-10.19	0	0	-11.04	0.01	0	19.48	0.01	0	-6.385	0.003	0.001	0.157	0.007	0.002	-7.086	0.054	0.018	-0.657	0.051	0.017	-1.698	0.154	0.051	-2.011	0.147	0.049	117.151	1.526	0.509	124.456	1.539	0.513	-1.239	0.015	0.005
R548	2017-09-01 21:51 PDT	CO2 clumped	OK	FALSE	Carmel Chalk		Chewbacca	Carmel Chalk	Calcite	2017-03-03 00:00:00 PST	90	9	9	-2.14	0	0	3.97	0.01	0	34.95	0.01	0	1.685	0.002	0.001	15.33	0.009	0.003	16.631	0.035	0.012	-0.2	0.035	0.012	31.591	0.203	0.068	0.676	0.201	0.067	111.59	1.197	0.399	76.916	1.162	0.387	-1.185	0.012	0.004
R549	2017-09-02 14:03 PDT	CO2 clumped	OK	FALSE	Evap DI + CM UH 8/8/17		Chewbacca	Unheated gas	CO2	2017-03-03 00:00:00 PST		9	9	1.35	0	0	-2.24	0	0	28.55	0.01	0	4.752	0.003	0.001	9.069	0.005	0.002	13.957	0.064	0.021	0.094	0.063	0.021	17.975	0.15	0.05	-0.241	0.148	0.049	113.261	1.954	0.651	88.174	1.905	0.635	-1.221	0.022	0.007
R550	2017-09-05 13:20 PDT	CO2 clumped	OK	FALSE	Bonedry DI H 7.7.17 ND		Chewbacca	Heated Gas	CO2	2017-03-03 00:00:00 PST		9	9	-36.32	0	0	-2.76	0	0	28.01	0	0	-30.605	0.004	0.001	8.458	0.002	0.001	-24.444	0.049	0.016	-0.944	0.049	0.016	16.194	0.219	0.073	-0.78	0.217	0.072	128.761	5.536	1.845	147.669	5.631	1.877	-1.362	0.035	0.012
R551	2017-09-05 15:24 PDT	CO2 clumped	OK	FALSE	ETH-1-1		Chewbacca	ETH-1-1	Calcite	2017-03-03 00:00:00 PST	90	9	9	2.04	0	0	5.62	0.01	0	36.66	0.01	0	5.671	0.003	0.001	17.014	0.006	0.002	22.135	0.038	0.013	-0.528	0.039	0.013	34.984	0.215	0.072	0.644	0.215	0.072	117.736	1.399	0.466	74.789	1.354	0.451	-1.256	0.014	0.005
R552	2017-09-05 21:41 PDT	CO2 clumped	OK	FALSE	Veinstrom		Chewbacca	Veinstrom	Calcite	2017-03-03 00:00:00 PST	90	9	9	-6.08	0	0	-4.65	0	0	26.07	0	0	-2.309	0.002	0.001	6.615	0.003	0.001	3.859	0.026	0.009	-0.246	0.028	0.009	12.468	0.229	0.076	-0.796	0.224	0.075	118.463	1.578	0.526	106.787	1.562	0.521	-1.271	0.012	0.004
R553	2017-09-06 13:38 PDT	CO2 clumped	OK	FALSE	Evap DI + CM H 7/27/17 BT		Chewbacca	Heated Gas	CO2	2017-03-03 00:00:00 PST		9	9	1.8	0	0	-2.16	0	0	28.64	0	0	5.169	0.002	0.001	9.153	0.004	0.001	13.632	0.019	0.006	-0.737	0.02	0.007	17.775	0.166	0.055	-0.604	0.166	0.055	117.133	1.971	0.657	91.296	1.928	0.643	-1.238	0.023	0.008
R554	2017-09-06 15:47 PDT	CO2 clumped	OK	FALSE	Cm tile		Chewbacca	CMTile	Calcite	2017-03-03 00:00:00 PST	90	9	9	2.1	0	0	6.36	0	0	37.42	0	0	5.747	0.002	0.001	17.758	0.004	0.001	23.036	0.057	0.019	-0.443	0.056	0.019	36.786	0.216	0.072	0.922	0.211	0.07	114.079	1.836	0.612	69.65	1.764	0.588	-1.202	0.016	0.005
R555	2017-09-06 22:01 PDT	CO2 clumped	OK	FALSE	carmel chalk		Chewbacca	Carmel Chalk	Calcite	2017-03-03 00:00:00 PST	90	9	9	-2.12	0	0	3.95	0.01	0	34.93	0.01	0	1.704	0.002	0.001	15.314	0.005	0.002	16.624	0.032	0.011	-0.211	0.029	0.01	31.359	0.146	0.049	0.482	0.141	0.047	115.182	1.926	0.642	80.406	1.862	0.621	-1.196	0.019	0.006
R556	2017-09-07 12:13 PDT	CO2 clumped	OK	FALSE	Bonedry DI H NH 4/4/17		Chewbacca	Heated Gas	CO2	2017-03-03 00:00:00 PST		9	9	-37.49	0	0	-6.94	0	0	23.71	0	0	-31.845	0.003	0.001	4.236	0.004	0.001	-29.773	0.035	0.012	-0.976	0.034	0.011	7.297	0.26	0.087	-1.182	0.259	0.086	117.965	3.031	1.01	147.664	3.117	1.039	-1.231	0.022	0.007
R557	2017-09-09 13:18 PDT	CO2 clumped	OK	FALSE	Bonedry DI UH 8/8/17 BJ		Chewbacca	Unheated gas	CO2	2017-03-03 00:00:00 PST		9	9	1.38	0	0	-2.15	0	0	28.64	0	0	4.783	0.003	0.001	9.158	0.004	0.001	14.091	0.041	0.014	0.107	0.039	0.013	18.224	0.194	0.065	-0.173	0.193	0.064	107.405	2.27	0.757	82.226	2.216	0.739	-1.166	0.021	0.007
R558	2017-09-09 15:27 PDT	CO2 clumped	OK	FALSE	Mallinckrodt CaCO3		Chewbacca	MallinckrodtCal	Calcite	2017-03-03 00:00:00 PST	90	9	9	-40.4	0	0	-14.21	0	0	16.21	0	0	-34.826	0.002	0.001	-3.116	0.004	0.001	-39.514	0.032	0.011	-0.664	0.032	0.011	-8.526	0.181	0.06	-2.32	0.186	0.062	117.204	2.193	0.731	167.389	2.293	0.764	-1.263	0.018	0.006
R559	2017-09-10 12:36 PDT	CO2 clumped	OK	FALSE	Bonedry DI UH WD 3/13		Chewbacca	Unheated gas	CO2	2017-03-03 00:00:00 PST		9	9	-37.58	0	0	10	0.01	0	41.17	0.01	0	-31.346	0.003	0.001	21.352	0.006	0.002	-12.105	0.043	0.014	-0.067	0.044	0.015	45.121	0.303	0.101	1.879	0.286	0.095	107.028	1.726	0.575	98.735	1.718	0.573	-1.179	0.019	0.006
R560	2017-09-10 14:48 PDT	CO2 clumped	OK	FALSE	CMTile		Chewbacca	CMTile	Calcite	2017-03-03 00:00:00 PST	90	9	9	2.06	0	0	6.31	0	0	37.37	0	0	5.708	0.002	0.001	17.708	0.002	0.001	22.959	0.029	0.01	-0.43	0.03	0.01	36.684	0.217	0.072	0.922	0.213	0.071	103.016	1.317	0.439	59.174	1.261	0.42	-1.121	0.016	0.005
R561	2017-09-10 23:08 PDT	CO2 clumped	OK	FALSE	Carmel Chalk		Chewbacca	Carmel Chalk	Calcite	2017-03-03 00:00:00 PST	90	9	9	-2.18	0	0	3.91	0	0	34.89	0	0	1.646	0.003	0.001	15.268	0.001	0	16.525	0.049	0.016	-0.205	0.047	0.016	31.613	0.185	0.062	0.818	0.18	0.06	105.528	2.622	0.874	71.214	2.539	0.846	-1.137	0.026	0.009
R562	2017-09-11 11:08 PDT	CO2 clumped	OK	FALSE	Evap DI+CM UH		Chewbacca	Unheated gas	CO2	2017-03-03 00:00:00 PST		9	9	1.28	0	0	-2.38	0	0	28.41	0	0	4.682	0.002	0.001	8.93	0.005	0.002	13.754	0.04	0.013	0.101	0.038	0.013	17.774	0.238	0.079	-0.162	0.231	0.077	100.224	1.087	0.362	75.802	1.064	0.355	-1.104	0.012	0.004
R563	2017-09-11 13:16 PDT	CO2 clumped	OK	FALSE	88B dolomitic limeston		Chewbacca	SRM 88B	Dolomite	2017-03-03 00:00:00 PST	90	9	9	1.94	0	0	1.18	0	0	32.07	0	0	5.42	0.002	0.001	12.52	0.004	0.001	17.699	0.034	0.011	-0.266	0.034	0.011	25.637	0.235	0.078	0.431	0.23	0.077	99.06	1.14	0.38	66.353	1.103	0.368	-1.081	0.012	0.004
R564	2017-09-11 21:47 PDT	CO2 clumped	OK	FALSE	VeinStrom		Chewbacca	Veinstrom	Calcite	2017-03-03 00:00:00 PST	90	9	9	-6.13	0	0	-4.72	0	0	26	0	0	-2.351	0.002	0.001	6.547	0.004	0.001	3.757	0.049	0.016	-0.238	0.046	0.015	12.534	0.179	0.06	-0.596	0.176	0.059	102.869	1.08	0.36	91.551	1.071	0.357	-1.119	0.011	0.004
R565	2017-09-12 23:43 PDT	CO2 clumped	OK	FALSE	cm tile		Chewbacca	CMTile	Calcite	2017-03-03 00:00:00 PST	90	9	9	2.05	0	0	6.38	0	0	37.43	0	0	5.704	0.002	0.001	17.774	0.004	0.001	23.057	0.052	0.017	-0.394	0.049	0.016	38.77	0.228	0.076	2.806	0.221	0.074	-9.332	1.741	0.58	-48.826	1.671	0.557	0.099	0.018	0.006
R566	2017-09-14 14:26 PDT	CO2 clumped	OK	FALSE	Mallinckrodt CaCO3		Chewbacca	MallinckrodtCal	Calcite	2017-03-03 00:00:00 PST	90	9	9	-40.2	0	0	-14.12	0.01	0	16.3	0.01	0	-34.639	0.002	0.001	-3.028	0.005	0.002	-39.163	0.03	0.01	-0.584	0.031	0.01	-6.726	0.244	0.081	-0.683	0.247	0.082	30.738	2.045	0.682	76.63	2.136	0.712	-0.333	0.022	0.007
R567	2017-09-15 22:10 PDT	CO2 clumped	OK	FALSE	Veinstrom		Chewbacca	Veinstrom	Calcite	2017-03-03 00:00:00 PST	90	9	9	-6.05	0	0	-4.75	0	0	25.96	0	0	-2.276	0.003	0.001	6.512	0.005	0.002	3.777	0.055	0.018	-0.262	0.056	0.019	12.386	0.189	0.063	-0.672	0.191	0.064	112.171	2.258	0.753	100.744	2.235	0.745	-1.213	0.023	0.008
R568	2017-09-18 21:17 PDT	CO2 clumped	OK	FALSE	CMTile		Chewbacca	CMTile	Calcite	2017-03-03 00:00:00 PST	90	9	9	2.04	0	0	6.22	0	0	37.27	0	0	5.683	0.002	0.001	17.612	0.004	0.001	22.847	0.036	0.012	-0.422	0.035	0.012	36.574	0.18	0.06	1.004	0.178	0.059	106.283	1.742	0.581	62.535	1.678	0.559	-1.156	0.018	0.006
R569	2017-09-19 12:13 PDT	CO2 clumped	OK	FALSE	Bonedry DI H NH 7.7.17		Chewbacca	Heated Gas	CO2	2017-03-03 00:00:00 PST		9	9	-36.38	0	0	-3.34	0	0	27.42	0	0	-30.681	0.003	0.001	7.875	0.003	0.001	-25.066	0.037	0.012	-0.932	0.039	0.013	14.988	0.189	0.063	-0.811	0.189	0.063	115.077	1.16	0.387	135.139	1.182	0.394	-1.292	0.011	0.004
R570	2017-09-19 14:17 PDT	CO2 clumped	OK	FALSE	ETH-2-1		Chewbacca	ETH-2-1	Calcite	2017-03-03 00:00:00 PST	90	9	9	-10.19	0	0	-11	0	0	19.52	0.01	0	-6.378	0.003	0.001	0.193	0.005	0.002	-7.058	0.051	0.017	-0.672	0.05	0.017	-1.535	0.189	0.063	-1.92	0.184	0.061	111.837	1.175	0.392	119.019	1.178	0.393	-1.244	0.014	0.005
R571	2017-09-19 20:38 PDT	CO2 clumped	OK	FALSE	Mallinckrodt CaCO3		Chewbacca	MallinckrodtCal	Calcite	2017-03-03 00:00:00 PST	90	9	9	-40.19	0	0	-14.21	0.01	0	16.21	0.01	0	-34.634	0.003	0.001	-3.115	0.005	0.002	-39.286	0.026	0.009	-0.632	0.029	0.01	-8.621	0.153	0.051	-2.415	0.153	0.051	116.443	1.375	0.458	166.344	1.444	0.481	-1.284	0.014	0.005
R572	2017-09-20 12:37 PDT	CO2 clumped	OK	FALSE	Evap DI + CM UH 6.25.27 DU		Chewbacca	Unheated gas	CO2	2017-03-03 00:00:00 PST		3	3	2.17	0.01	0	-5.41	0.01	0	25.29	0.01	0	5.41	0.006	0.003	5.87	0.006	0.003	11.442	0.044	0.025	0.057	0.045	0.026	12.685	0.197	0.114	0.899	0.2	0.116	106.628	1.845	1.065	87.701	1.799	1.039	-1.162	0.019	0.011
R573	2017-09-20 22:07 PDT	CO2 clumped	OK	FALSE	SRM 88B		Chewbacca	SRM 88B	Dolomite	2017-03-03 00:00:00 PST	90	9	9	1.83	0	0	1.15	0	0	32.05	0	0	5.317	0.003	0.001	12.493	0.004	0.001	17.537	0.059	0.02	-0.294	0.061	0.02	25.199	0.144	0.048	0.055	0.135	0.045	102.102	1.282	0.427	69.476	1.244	0.415	-1.115	0.01	0.003
R574	2017-09-21 02:30 PDT	CO2 clumped	OK	FALSE	CMTile		Chewbacca	CMTile	Calcite	2017-03-03 00:00:00 PST	90	9	9	2.03	0	0	6.18	0	0	37.23	0	0	5.673	0.003	0.001	17.571	0.005	0.002	22.79	0.034	0.011	-0.427	0.036	0.012	36.223	0.124	0.041	0.746	0.119	0.04	100.363	1.778	0.593	56.944	1.703	0.568	-1.096	0.016	0.005
R575	2017-09-21 21:35 PDT	CO2 clumped	OK	FALSE	ETH-4-1		Chewbacca	ETH-4-1	Calcite	2017-03-03 00:00:00 PST	90	9	9	-10.25	0	0	-11.2	0	0	19.31	0	0	-6.439	0.002	0.001	-0.015	0.004	0.001	-7.117	0.031	0.01	-0.464	0.03	0.01	-1.771	0.205	0.068	-1.742	0.204	0.068	107.002	1.454	0.485	114.681	1.463	0.488	-1.168	0.015	0.005
R576	2017-09-22 12:30 PDT	CO2 clumped	OK	FALSE	Evap DI+CM H DU 7.10.17		Chewbacca	Heated Gas	CO2	2017-03-03 00:00:00 PST		9	9	0.45	0	0	-5.68	0	0	25	0	0	3.783	0.002	0.001	5.585	0.004	0.001	8.648	0.047	0.016	-0.76	0.045	0.015	10.986	0.422	0.141	-0.212	0.423	0.141	115.834	1.72	0.573	99.257	1.701	0.567	-1.247	0.019	0.006
R577	2017-09-22 14:40 PDT	CO2 clumped	OK	FALSE	Carmel Chalk		Chewbacca	Carmel Chalk	Calcite	2017-03-03 00:00:00 PST	90	9	9	-2.22	0	0	3.81	0	0	34.78	0	0	1.605	0.002	0.001	15.169	0.003	0.001	16.379	0.068	0.023	-0.21	0.065	0.022	30.726	0.158	0.053	0.153	0.155	0.052	111.509	1.797	0.599	77.264	1.737	0.579	-1.2	0.014	0.005
R578	2017-09-22 20:58 PDT	CO2 clumped	OK	FALSE	CMTile		Chewbacca	CMTile	Calcite	2017-03-03 00:00:00 PST	90	9	9	2.1	0	0	6.37	0.01	0	37.43	0.01	0	5.751	0.003	0.001	17.767	0.006	0.002	23.071	0.052	0.017	-0.421	0.049	0.016	36.197	0.287	0.096	0.336	0.272	0.091	109.804	1.938	0.646	65.523	1.855	0.618	-1.177	0.016	0.005
R579	2017-09-23 03:23 PDT	CO2 clumped	OK	FALSE	VeinStrom		Chewbacca	Veinstrom	Calcite	2017-03-03 00:00:00 PST	90	9	9	-6.04	0	0	-4.74	0.01	0	25.97	0.01	0	-2.267	0.003	0.001	6.525	0.005	0.002	3.817	0.028	0.009	-0.243	0.029	0.01	113.42	45.142	15.047	99.031	44.553	14.851	102.788	5.654	1.885	91.419	5.601	1.867	-1.092	0.063	0.021
R580	2017-09-23 19:51 PDT	CO2 clumped	OK	FALSE	ETH-2-1		Chewbacca	ETH-2-1	Calcite	2017-03-03 00:00:00 PST	90	9	9	-10.21	0	0	-11.06	0	0	19.46	0	0	-6.406	0.003	0.001	0.128	0.003	0.001	-7.163	0.045	0.015	-0.684	0.045	0.015	-1.596	0.238	0.079	-1.851	0.24	0.08	113.139	0.997	0.332	120.506	1.008	0.336	-1.227	0.01	0.003
R581	2017-09-24 02:18 PDT	CO2 clumped	OK	FALSE	Carrera Marble		Chewbacca	Carrara Marble	Calcite	2017-03-03 00:00:00 PST	90	9	9	2.07	0	0	6.38	0.01	0	37.44	0.01	0	5.719	0.001	0	17.778	0.005	0.002	23.044	0.051	0.017	-0.426	0.048	0.016	36.644	0.179	0.06	0.746	0.17	0.057	107.942	1.408	0.469	63.747	1.355	0.452	-1.164	0.013	0.004
R582	2017-09-24 13:05 PDT	CO2 clumped	OK	FALSE	Bonedry DI UH 8.3.17 DU		Chewbacca	Unheated gas	CO2	2017-03-03 00:00:00 PST		9	9	-37.95	0	0	-4.59	0	0	26.13	0	0	-32.191	0.003	0.001	6.61	0.004	0.001	-27.063	0.04	0.013	-0.138	0.041	0.014	12.519	0.207	0.069	-0.736	0.203	0.068	110.339	1.75	0.583	134.995	1.791	0.597	-1.236	0.019	0.006
R583	2017-09-24 15:08 PDT	CO2 clumped	OK	FALSE	CMTile		Chewbacca	CMTile	Calcite	2017-03-03 00:00:00 PST	90	9	9	2.05	0	0	6.31	0.01	0	37.37	0.01	0	5.697	0.002	0.001	17.71	0.005	0.002	22.957	0.035	0.012	-0.424	0.036	0.012	36.384	0.108	0.036	0.627	0.099	0.033	102.54	1.894	0.631	58.724	1.819	0.606	-1.134	0.019	0.006
R584	2017-09-24 21:33 PDT	CO2 clumped	OK	FALSE	Carmel Chalk		Chewbacca	Carmel Chalk	Calcite	2017-03-03 00:00:00 PST	90	9	9	-2	0	0	3.92	0	0	34.9	0	0	1.823	0.002	0.001	15.287	0.002	0.001	16.712	0.04	0.013	-0.222	0.042	0.014	31.366	0.223	0.074	0.541	0.217	0.072	101.007	1.53	0.51	66.594	1.476	0.492	-1.11	0.014	0.005
R585	2017-09-25 01:48 PDT	CO2 clumped	OK	FALSE	SRM 88B		Chewbacca	SRM 88B	Dolomite	2017-03-03 00:00:00 PST	90	9	9	1.92	0	0	1.29	0	0	32.19	0	0	5.409	0.002	0.001	12.637	0.004	0.001	17.832	0.032	0.011	-0.237	0.03	0.01	761.931	30.807	10.269	718.229	30.044	10.015	-16.454	9.191	3.064	-45.93	8.914	2.971	0.162	0.09	0.03
R586	2017-09-25 11:18 PDT	CO2 clumped	OK	FALSE	Evap DI+CM UH 8.3.17 DU		Chewbacca	Unheated gas	CO2	2017-03-03 00:00:00 PST		9	9	0.29	0	0	-3.92	0.01	0	26.82	0.01	0	3.698	0.003	0.001	7.372	0.006	0.002	11.213	0.036	0.012	0.122	0.037	0.012	15.108	0.247	0.082	0.306	0.246	0.082	107.036	1.941	0.647	86.889	1.914	0.638	-1.189	0.023	0.008
R587	2017-09-26 12:09 PDT	CO2 clumped	OK	FALSE	Bonedry DI H 7.19.17 GJ		Chewbacca	Heated Gas	CO2	2017-03-03 00:00:00 PST		9	9	-37.95	0	0	-6.12	0	0	24.55	0	0	-32.247	0.002	0.001	5.067	0.004	0.001	-29.414	0.05	0.017	-0.991	0.05	0.017	8.845	0.199	0.066	-1.302	0.193	0.064	115.004	2.578	0.859	143.272	2.652	0.884	-1.328	0.029	0.01
R588	2017-09-26 14:16 PDT	CO2 clumped	OK	FALSE	8544 NBS19 Limestone		Chewbacca	NBS 19	Calcite	2017-03-03 00:00:00 PST	90	9	9	1.93	0	0	5.59	0	0	36.62	0	0	5.562	0.003	0.001	16.978	0.004	0.001	22.077	0.047	0.016	-0.438	0.045	0.015	34.605	0.13	0.043	0.349	0.125	0.042	108.469	2.252	0.751	66.077	2.166	0.722	-1.203	0.022	0.007
R589	2017-09-26 22:36 PDT	CO2 clumped	OK	FALSE	Mallinckrodt CaCO3		Chewbacca	MallinckrodtCal	Calcite	2017-03-03 00:00:00 PST	90	9	9	-40.4	0	0	-14.34	0	0	16.08	0	0	-34.834	0.004	0.001	-3.243	0.003	0.001	-39.608	0.048	0.016	-0.627	0.049	0.016	-8.639	0.26	0.087	-2.178	0.265	0.088	115.9	1.181	0.394	166.33	1.236	0.412	-1.275	0.011	0.004
R590	2017-09-28 12:50 PDT	CO2 clumped	OK	FALSE	Evap DI + CM H 7.10.17 DU		Chewbacca	Heated Gas	CO2	2017-03-03 00:00:00 PST		9	9	1.28	0	0	-3.28	0	0	27.48	0	0	4.649	0.002	0.001	8.012	0.003	0.001	11.949	0.041	0.014	-0.753	0.042	0.014	15.202	0.26	0.087	-0.873	0.259	0.086	107.376	1.698	0.566	84.771	1.658	0.553	-1.2	0.019	0.006
R591	2017-09-28 14:56 PDT	CO2 clumped	OK	FALSE	ETH-1-1		Chewbacca	ETH-1-1	Calcite	2017-03-03 00:00:00 PST	90	9	9	1.97	0	0	5.45	0.01	0	36.48	0.01	0	5.596	0.003	0.001	16.841	0.005	0.002	21.857	0.047	0.016	-0.555	0.043	0.014	34.625	0.214	0.071	0.638	0.207	0.069	103.606	1.276	0.425	61.642	1.232	0.411	-1.149	0.014	0.005
R592	2017-09-28 21:17 PDT	CO2 clumped	OK	FALSE	ETH-4-1		Chewbacca	ETH-4-1	Calcite	2017-03-03 00:00:00 PST	90	9	9	-10.16	0	0	-11.06	0	0	19.46	0	0	-6.358	0.003	0.001	0.134	0.002	0.001	-6.894	0.047	0.016	-0.471	0.046	0.015	-1.476	0.218	0.073	-1.744	0.219	0.073	105.977	2.516	0.839	113.225	2.534	0.845	-1.185	0.021	0.007
R593	2017-10-01 23:23 PDT	CO2 clumped	OK	FALSE	88B dolomitic limestone		Chewbacca	SRM 88B	Dolomite	2017-03-03 00:00:00 PST	90	9	9	1.87	0	0	1.03	0.01	0	31.93	0.01	0	5.349	0.003	0.001	12.376	0.005	0.002	17.496	0.05	0.017	-0.253	0.052	0.017	24.34	0.182	0.061	-0.551	0.179	0.06	107.376	1.484	0.495	74.803	1.438	0.479	-1.16	0.013	0.004
R594	2017-10-03 14:41 PDT	CO2 clumped	OK	FALSE	Bonedry DI H 7.6.17 NH		Chewbacca	Heated Gas	CO2	2017-03-03 00:00:00 PST		9	9	-37.43	0	0	-5.04	0	0	25.66	0	0	-31.727	0.002	0.001	6.151	0.004	0.001	-27.842	0.043	0.014	-0.986	0.045	0.015	11.123	0.134	0.045	-1.202	0.13	0.043	107.828	1.418	0.473	132.863	1.444	0.481	-1.204	0.017	0.006
R595	2017-10-04 01:18 PDT	CO2 clumped	OK	FALSE	Mallinckrodt CaCO3		Chewbacca	MallinckrodtCal	Calcite	2017-03-03 00:00:00 PST	90	9	9	-40.51	0	0	-14.59	0	0	15.82	0	0	-34.94	0.003	0.001	-3.504	0.004	0.001	-40.01	0.04	0.013	-0.674	0.041	0.014	-9.018	0.229	0.076	-2.037	0.226	0.075	114.232	1.488	0.496	165.321	1.565	0.522	-1.246	0.013	0.004
R596	2017-10-04 12:57 PDT	CO2 clumped	OK	FALSE	ETH-2-2		Chewbacca	ETH-2-2	Calcite	2017-03-03 00:00:00 PST	90	9	9	-10.12	0	0	-10.89	0.01	0	19.63	0.01	0	-6.31	0.002	0.001	0.3	0.007	0.002	-6.909	0.034	0.011	-0.697	0.034	0.011	-1.078	0.196	0.065	-1.677	0.204	0.068	108.072	1.356	0.452	114.914	1.375	0.458	-1.184	0.013	0.004
R597	2017-10-04 17:44 PDT	CO2 clumped	OK	FALSE	Mallinckrodt CaCO3		Chewbacca	MallinckrodtCal	Calcite	2017-03-03 00:00:00 PST	90	9	9	-40.22	0	0	-14.15	0	0	16.27	0	0	-34.656	0.002	0.001	-3.053	0.003	0.001	-39.287	0.041	0.014	-0.671	0.042	0.014	-8.165	0.157	0.052	-2.082	0.161	0.054	110.401	1.781	0.594	159.918	1.861	0.62	-1.2	0.019	0.006
R598	2017-10-05 00:07 PDT	CO2 clumped	OK	FALSE	Carrera Marble UCLA		Chewbacca	Carrara Marble	Calcite	2017-03-03 00:00:00 PST	90	9	9	2.05	0	0	6.41	0	0	37.47	0	0	5.707	0.001	0	17.812	0.004	0.001	23.028	0.042	0.014	-0.462	0.04	0.013	36.406	0.157	0.052	0.449	0.15	0.05	99.607	1.206	0.402	55.69	1.159	0.386	-1.086	0.012	0.004
R599	2017-10-05 15:00 PDT	CO2 clumped	OK	FALSE	ETH-1-1		Chewbacca	ETH-1-1	Calcite	2017-03-03 00:00:00 PST	90	9	9	2.02	0	0	5.59	0.01	0	36.62	0.01	0	5.646	0.002	0.001	16.981	0.005	0.002	22.051	0.033	0.011	-0.552	0.033	0.011	34.507	0.109	0.036	0.249	0.103	0.034	102.319	1.971	0.657	60.061	1.898	0.633	-1.133	0.02	0.007
R600	2017-10-06 12:40 PDT	CO2 clumped	OK	FALSE	Bonedry DI UH 6.19.17 GJ		Chewbacca	Unheated gas	CO2	2017-03-03 00:00:00 PST		9	9	-37.55	0	0	2.25	0	0	33.18	0.01	0	-31.581	0.003	0.001	13.516	0.005	0.002	-19.814	0.026	0.009	-0.085	0.029	0.01	28.089	0.15	0.05	0.85	0.144	0.048	111.2	2.194	0.731	119.971	2.214	0.738	-1.223	0.022	0.007
R601	2017-10-06 18:53 PDT	CO2 clumped	OK	FALSE	VeinStrom		Chewbacca	Veinstrom	Calcite	2017-03-03 00:00:00 PST	90	9	9	-6.05	0	0	-4.72	0	0	25.99	0	0	-2.276	0.002	0.001	6.541	0.004	0.001	3.862	0.041	0.014	-0.204	0.042	0.014	13.23	0.182	0.061	0.105	0.174	0.058	99.071	2.528	0.843	87.717	2.507	0.836	-1.084	0.024	0.008
R602	2017-10-07 01:20 PDT	CO2 clumped	OK	FALSE	NBS19 Limestone		Chewbacca	NBS 19	Calcite	2017-03-03 00:00:00 PST	90	9	9	2.02	0	0	5.81	0	0	36.85	0	0	5.657	0.002	0.001	17.199	0.003	0.001	22.497	0.022	0.007	-0.338	0.021	0.007	141.257	4.41	1.47	102.99	4.267	1.422	71.065	2.428	0.809	29.559	2.334	0.778	-0.762	0.018	0.006
R603	2017-10-08 00:22 PDT	CO2 clumped	OK	FALSE	ETH 4-2		Chewbacca	ETH-4-2	Calcite	2017-03-03 00:00:00 PST	90	9	9	-10.16	0	0	-11.02	0.01	0	19.5	0.01	0	-6.355	0.002	0.001	0.171	0.006	0.002	-6.852	0.047	0.016	-0.467	0.045	0.015	-1.324	0.239	0.08	-1.665	0.238	0.079	102.578	1.523	0.508	109.721	1.529	0.51	-1.132	0.016	0.005
R604	2017-10-08 21:35 PDT	CO2 clumped	OK	FALSE	ETH-1-1		Chewbacca	ETH-1-1	Calcite	2017-03-03 00:00:00 PST	90	9	9	2.01	0	0	5.51	0	0	36.54	0	0	5.635	0.003	0.001	16.895	0.003	0.001	21.976	0.045	0.015	-0.531	0.043	0.014	34.211	0.208	0.069	0.132	0.203	0.068	96.987	2.516	0.839	55.121	2.415	0.805	-1.077	0.024	0.008
R605	2017-10-09 03:58 PDT	CO2 clumped	OK	FALSE	ETH-4-2		Chewbacca	ETH-4-2	Calcite	2017-03-03 00:00:00 PST	90	9	9	-10.12	0	0	-10.96	0	0	19.56	0	0	-6.316	0.002	0.001	0.231	0.003	0.001	-6.742	0.033	0.011	-0.456	0.033	0.011	-0.818	0.212	0.071	-1.279	0.214	0.071	99.637	1.676	0.559	106.584	1.685	0.562	-1.101	0.017	0.006
R606	2017-10-09 14:28 PDT	CO2 clumped	OK	FALSE	ETH-1-1		Chewbacca	ETH-1-1	Calcite	2017-03-03 00:00:00 PST	90	9	9	2.05	0	0	5.63	0	0	36.67	0	0	5.675	0.003	0.001	17.022	0.003	0.001	22.106	0.045	0.015	-0.568	0.044	0.015	34.619	0.175	0.058	0.276	0.166	0.055	96.161	1.582	0.527	54.023	1.519	0.506	-1.077	0.016	0.005
R607	2017-10-09 22:43 PDT	CO2 clumped	OK	FALSE	ETH-1-1		Chewbacca	ETH-1-1	Calcite	2017-03-03 00:00:00 PST	90	9	9	2.11	0	0	5.76	0.01	0	36.8	0.01	0	5.738	0.002	0.001	17.154	0.005	0.002	22.346	0.041	0.014	-0.525	0.042	0.014	34.909	0.22	0.073	0.297	0.213	0.071	94.455	1.229	0.41	52.044	1.174	0.391	-1.056	0.013	0.004
R608	2017-10-10 11:55 PDT	CO2 clumped	OK	FALSE	Bonedry DI H 6/29/2017 NH		Chewbacca	Heated Gas	CO2	2017-03-03 00:00:00 PST		9	9	-37.63	0	0	0.94	0.01	0	31.83	0.01	0	-31.701	0.003	0.001	12.198	0.007	0.002	-22.057	0.057	0.019	-0.967	0.057	0.019	24.203	0.275	0.092	-0.333	0.267	0.089	102.478	1.64	0.547	114.172	1.666	0.555	-1.159	0.019	0.006
R609	2017-10-10 13:56 PDT	CO2 clumped	OK	FALSE	ETH-2-2		Chewbacca	ETH-2-2	Calcite	2017-03-03 00:00:00 PST	90	9	9	-10.15	0	0	-10.9	0.01	0	19.62	0.01	0	-6.342	0.003	0.001	0.294	0.006	0.002	-6.928	0.037	0.012	-0.677	0.035	0.012	-1.118	0.221	0.074	-1.705	0.225	0.075	102.279	1.533	0.511	109.137	1.542	0.514	-1.147	0.016	0.005
R610	2017-10-11 12:02 PDT	CO2 clumped	OK	FALSE	EvapDI+CM H DU 6-13-17		Chewbacca	Heated Gas	CO2	2017-03-03 00:00:00 PST		9	9	2.9	0	0	-3.83	0	0	26.91	0	0	6.143	0.002	0.001	7.464	0.004	0.001	12.95	0.037	0.012	-0.762	0.039	0.013	14.037	0.123	0.041	-0.932	0.117	0.039	98.162	1.868	0.623	75.192	1.835	0.612	-1.114	0.02	0.007
R611	2017-10-11 14:05 PDT	CO2 clumped	OK	FALSE	Carmel Chalk		Chewbacca	Carmel Chalk	Calcite	2017-03-03 00:00:00 PST	90	9	9	-2.28	0	0	3.8	0	0	34.78	0	0	1.552	0.003	0.001	15.16	0.004	0.001	16.327	0.019	0.006	-0.198	0.016	0.005	30.858	0.15	0.05	0.299	0.15	0.05	93.858	1.405	0.468	60.235	1.357	0.452	-1.063	0.012	0.004
R612	2017-10-11 22:23 PDT	CO2 clumped	OK	FALSE	VeinStrom		Chewbacca	Veinstrom	Calcite	2017-03-03 00:00:00 PST	90	9	9	-6.1	0	0	-4.7	0	0	26.01	0	0	-2.325	0.002	0.001	6.565	0.004	0.001	3.805	0.058	0.019	-0.234	0.057	0.019	12.431	0.306	0.102	-0.732	0.308	0.103	98.564	1.904	0.635	87.222	1.883	0.628	-1.102	0.019	0.006
[truncated: 15 more columns]
